# Supplementary material for: Impact of different stages of intrauterine inflammation on outcome of preterm neonates: Gestational age-dependent and -independent effect
Source: PLoS One. 2019 Feb 8;14(2):e0211484. doi: 10.1371/journal.pone.0211484 (PMC6368287; doi:10.1371/journal.pone.0211484)
Supplement: S1 File — Enlisted patients are completely anonymized. (XLS) [file pone.0211484.s001.xls]

## Sheet: Foglio1
NSCHEDA	SEX	BW	EG	AGA/SGA Fenton '03	ETNIA	TIPO DI GRAV.	TIPO di PARTO	ANESTESIA	GEMELLARITA'	LIQUIDO TINTO	RIANIM.SP	CICLI SLI	NCPAP	VENTIL. IN MASCHERA	TET IN SP.	SURF. IN SP	O2 MAX IN SP	MASSAGGIO CARDIACO	FARMACI	APGAR 1	APGAR 5	APGAR 10	PH VEN	PH ART	SETT. ROM	TIPO ROTTURA	ORE LATENZA	GB AL PARTO	PCR AL PARTO (mg/dL)	TV	URINOCOLTURA	ANTIBIOTICO	FEBBRE AL PARTO	PRE-ECLAMPSIA (definitaSibai 2003)	ESPLORAZIONI DIGITALI	AMNIOS	STEROIDI	CA ISTOLOGICA SI/NO	CORIOAMNIONITE TIPO	CA CLINICA	FIRS/FUNISITE SI/NO	FIRS/FUNISITE TIPO	DECESSO NEONATALE	CAUSA MORTE NEONATALE	DURATA DEGENZA	DIMESSO	TAMPONI INGRESSO	SEPSI EOS	SEPSI LOS
1	0	1200	29.4	0	0	1	1	1	1	0	1	1	1	1	0	0	1	0	xxxx	6	8	-1	7.38	7.36	29+3	1	0	9.21	1.16	0	0	0	0	1	1	0	2	0	xxxx	0	0	xxxx	0	xxxx	49	1	1	0	0
2	1	1300	29.4	0	0	1	1	1	1	0	1	2	1	1	0	0	1	0	xxxx	6	8	-1	7.4	7.35	29+3	1	0	9.21	1.16	0	0	0	0	1	1	0	2	0	xxxx	0	0	xxxx	0	xxxx	63	1	1	0	0
3	0	1795	34.8	0	1	0	1	1	1	0	0	0	0	0	0	0	0	0	xxxx	9	10	-1	7.38	7.34	34+6	1	0	7.93	0.29	5 + 9	5 + 7 + 9	5 + 13	0	0	1	0	2	1	S1 G1 vasculite del piatto amnioc.	0	0	xxxx	0	xxxx	17	1	1	0	0
4	0	1830	34.8	0	1	0	1	1	1	0	1	1	1	1	0	0	0	0	xxxx	4	7	9	7.34	7.29	34+6	1	0	7.93	0.29	5 + 9	5 + 7 + 9	5 + 13	0	0	1	0	2	1	S1 G1 vasculite del piatto amnioc.	0	0	xxxx	0	xxxx	30	1	1	0	0
5	1	1910	33.3	0	0	1	1	1	0	3	0	0	0	0	0	0	0	0	xxxx	9	10	-1	7.28	7.23	33+1	0	28	19.13	0.77	1	1	5 + 4	1	1	1	0	2	1	S2 G1	1	0	xxxx	0	xxxx	17	1	1	0	0
6	1	1490	33	1	0	0	1	1	0	0	0	0	0	0	0	0	0	0	xxxx	9	10	-1	7.27	7.27	15	0	2808	5.99	0.6	0	0	0	0	0	1	2	2	0	xxxx	0	0	xxxx	0	xxxx	26	1	1	0	0
7	0	2050	33.4	0	0	0	1	1	1	0	0	0	0	0	0	0	0	0	xxxx	9	10	-1	7.38	7.32	34+2	0	10	12.13	-1	0	0	0	0	0	1	0	0	0	xxxx	0	0	xxxx	0	xxxx	5	1	0	0	0
8	1	2470	33.4	0	0	0	1	1	1	0	0	0	0	0	0	0	0	0	xxxx	9	10	-1	7.37	7.3	34+2	0	10	12.13	-1	0	0	0	0	0	1	0	0	0	xxxx	0	0	xxxx	0	xxxx	6	1	0	0	0
9	0	980	34.6	1	0	0	1	1	0	0	1	1	1	0	0	0	0	0	xxxx	8	9	-1	7.33	7.28	34+4	1	0	11.34	-1	0	0	0	0	0	1	0	2	0	xxxx	0	0	xxxx	0	xxxx	50	1	1	0	0
10	0	1850	34	0	0	1	1	1	1	0	0	0	0	0	0	0	0	0	xxxx	9	10	-1	7.38	7.32	34+0	1	0	8.5	-1	0	0	0	0	1	1	0	2	0	xxxx	0	0	xxxx	0	xxxx	17	1	1	0	0
11	1	1620	34	1	0	1	1	1	1	0	1	0	1	1	0	0	0	0	xxxx	6	8	-1	7.34	7.26	34+0	1	0	8.5	-1	0	0	0	0	1	1	0	2	0	xxxx	0	0	xxxx	0	xxxx	69	1	1	0	0
12	1	740	30.3	1	0	0	1	1	0	0	1	2	1	1	0	0	1	0	xxxx	6	8	-1	7.21	7.1	30+2	1	0	14.07	1.72	0	0	0	-1	1	1	2	1	0	xxxx	1	0	xxxx	0	xxxx	69	1	1	0	1
13	0	1400	29	0	0	1	1	2	0	0	1	0	0	0	1	0	1	0	xxxx	3	6	9	7.32	7.33	29+0	1	0	9.09	0.05	0	0	0	0	0	1	0	1	0	xxxx	0	0	xxxx	0	nota: FIBROSI CISTICA	104	1	1	0	1
14	0	1210	29.8	0	0	0	1	1	1	0	1	1	1	0	0	0	0	0	xxxx	8	9	-1	7.31	-1	29+6	1	0	12.39	-1	14	0	0	0	0	1	0	2	0	xxxx	0	0	xxxx	0	xxxx	88	1	1	0	0
15	0	750	29.8	1	0	0	1	1	1	0	1	2	0	0	1	0	1	0	xxxx	5	7	-1	7.41	-1	29+6	1	0	12.39	-1	14	0	0	0	0	1	0	2	0	xxxx	0	0	xxxx	0	xxxx	107	1	1	0	1
16	0	820	27	0	0	0	1	1	0	0	1	1	1	0	1	1	1	0	xxxx	6	7	-1	7.31	-1	29+5	0	15	13.42	1.14	2	1	2 + 4	0	0	1	0	2	1	S2 G2 + deciduite cronica	1	1	S2 G1	0	xxxx	77	1	1	0	1
17	1	1420	33	1	4	0	1	1	0	0	0	0	0	0	0	0	0	0	xxxx	8	9	-1	7.26	7.23	33+0	1	0	7.3	0.2	5 + 9	0	0	0	1	1	0	1	0	xxxx	0	0	xxxx	0	xxxx	30	1	1	0	0
18	0	1980	34.6	0	0	0	1	1	0	0	1	0	1	1	0	0	0	0	xxxx	5	9	-1	7.38	7.33	33+4	1	0	5.68	1.74	0	0	0	0	1	1	0	0	0	xxxx	0	0	xxxx	0	xxxx	15	1	1	0	0
19	0	2210	34.8	0	0	0	1	1	1	0	0	0	0	0	0	0	0	0	xxxx	9	10	-1	7.37	7.3	33+4	0	54	10.17	0.05	2	0	4 + 5	0	0	1	0	2	0	xxxx	0	0	xxxx	0	xxxx	9	1	1	0	0
20	0	2445	33.8	0	0	0	1	1	1	0	0	0	0	0	0	0	0	0	xxxx	8	9	-1	7.38	7.33	33+6	1	0	10.17	0.05	2	0	4 + 5	0	0	1	0	2	0	xxxx	0	0	xxxx	0	xxxx	9	1	1	0	0
21	0	2155	34.3	0	0	0	0	1	0	0	0	0	0	0	0	0	0	0	xxxx	8	10	-1	7.23	7.15	33+2	0	168	12.32	0.62	1	1	4 + 5	0	0	1	0	2	0	xxxx	0	0	xxxx	0	xxxx	8	1	1	0	0
22	0	2030	33.3	0	0	0	1	1	1	0	1	0	0	1	0	0	0	0	xxxx	8	9	-1	7.31	7.28	33+2	1	0	9.35	0.38	0	0	0	0	0	1	0	1	0	xxxx	0	0	xxxx	0	xxxx	23	1	1	0	0
23	0	2035	33.3	0	0	0	1	1	1	0	0	0	0	0	0	0	0	0	xxxx	8	9	-1	7.27	7.23	33+2	1	0	9.35	0.38	0	0	0	0	0	1	0	1	0	xxxx	0	0	xxxx	0	xxxx	23	1	1	0	0
24	1	1890	31	0	0	1	1	1	1	0	1	0	1	1	0	0	0	0	xxxx	5	9	-1	-1	7.3	31+0	0	0	12.22	0.05	1	0	5	0	0	1	0	1	0	xxxx	0	0	xxxx	0	xxxx	27	1	1	0	0
25	1	2030	31	0	0	1	1	1	1	0	0	0	0	0	0	0	0	0	xxxx	8	9	-1	7.32	-1	31+0	1	0	12.22	0.05	1	0	5	0	0	1	0	1	0	xxxx	0	0	xxxx	0	xxxx	27	1	1	0	0
26	1	880	25	0	0	0	0	0	0	1	1	1	1	1	0	0	1	0	xxxx	6	9	-1	7.36	7.3	25+0	0	0	11.38	1.58	1	7	4 + 5 + 10	0	0	1	0	2	1	S3 G2	0	1	S3 G2	0	xxxx	78	1	1	0	1
27	1	2430	33.8	0	0	0	1	2	0	0	1	0	1	1	0	0	1	0	xxxx	6	8	-1	7.35	7.34	33+6	1	0	20.23	0.57	1	16	0	0	0	1	0	2	0	xxxx	0	0	xxxx	0	xxxx	25	1	1	0	0
28	1	1680	33	0	0	0	1	1	0	0	1	0	1	1	0	0	0	0	xxxx	4	8	-1	7.31	7.29	33+0	1	0	19.61	0.53	0	0	0	0	1	1	0	2	0	xxxx	0	0	xxxx	0	xxxx	28	1	1	0	0
29	1	2295	33.6	0	0	0	1	1	0	0	0	0	0	0	0	0	0	0	xxxx	9	10	-1	7.36	7.29	33+5	1	0	9.9	0.29	0	0	0	0	0	1	0	2	0	xxxx	0	0	xxxx	0	xxxx	13	1	1	0	0
30	0	955	28	0	0	0	1	1	1	0	1	2	0	0	0	1	3	1	adrenalina x 3 sol. Fisiol	0	3	6	7.41	7.37	28+0	1	0	9.4	1.67	1	1	4 + 5 + 10	0	0	1	0	2	1	S3 G2	0	0	xxxx	1	Meningite da Gram -	55	0	1	0	1
31	1	950	28	0	0	0	1	1	1	0	1	0	1	1	0	0	1	0	xxxx	6	7	-1	7.36	7.37	28+0	1	0	9.4	1.67	1	1	4 + 5 + 10	0	0	1	0	2	1	S2 G2	0	0	xxxx	0	xxxx	81	1	1	0	0
32	0	1900	33.8	0	0	1	1	1	0	0	0	0	0	0	0	0	0	0	xxxx	8	9	-1	7.32	7.3	33+6	1	0	12.64	0.39	0	0	0	0	0	1	0	2	0	xxxx	0	0	xxxx	0	xxxx	21	1	1	0	0
33	1	2030	34.2	0	0	0	1	1	0	0	0	0	0	0	0	0	0	0	xxxx	9	10	-1	7.35	-1	25+0	0	1872	10.97	0.16	0	0	0	0	0	1	2	2	1	focolai di villite cronica	0	0	xxxx	0	xxxx	9	1	1	0	0
34	0	1285	31	0	0	1	1	1	1	0	0	0	0	0	0	0	0	0	xxxx	9	9	-1	7.33	7.37	31+0	1	0	11.12	0.49	1	1	0	0	1	1	0	2	0	xxxx	0	0	xxxx	0	xxxx	41	1	1	0	0
35	0	1150	31	1	0	1	1	1	1	0	0	0	0	0	0	0	0	0	xxxx	9	9	-1	7.36	7.31	31+0	1	0	11.12	0.49	1	1	0	0	1	1	0	2	0	xxxx	0	0	xxxx	0	xxxx	41	1	1	0	0
36	0	1495	32	0	0	0	1	1	1	0	0	0	0	0	0	0	0	0	xxxx	9	9	-1	7.36	-1	32+0	1	0	5.35	0.62	1	0	0	0	1	1	0	2	0	xxxx	0	0	xxxx	0	xxxx	38	1	1	0	0
37	1	1420	32	0	0	0	1	1	1	0	1	1	0	1	0	0	1	0	xxxx	7	9	-1	7.35	7.3	32+0	1	0	5.35	0.62	1	0	0	0	1	1	0	2	0	xxxx	0	0	xxxx	0	xxxx	38	1	1	0	0
38	1	1415	32	0	0	0	1	1	1	0	1	1	0	0	0	0	0	0	xxxx	7	8	-1	7.33	7.26	32+0	1	0	5.35	0.62	1	0	0	0	1	1	0	2	0	xxxx	0	0	xxxx	0	xxxx	38	1	1	0	0
39	1	1885	33.6	0	0	0	1	1	0	0	0	0	0	0	0	0	0	0	xxxx	9	10	-1	7.32	7.29	33+3	0	40	16.3	0.52	1	1	4 + 5	0	0	1	0	2	0	xxxx	0	0	xxxx	0	xxxx	19	1	1	0	0
40	1	600	29.3	1	0	1	1	1	0	0	1	1	1	1	0	0	1	0	xxxx	6	8	-1	7.31	7.26	29+5	1	0	11.26	0.51	0	0	0	0	0	0	0	2	1	Aree di villite e deciduite cronica	0	0	xxxx	0	xxxx	91	1	1	0	1
41	1	2320	34.2	0	0	0	0	0	0	0	0	0	0	0	0	0	0	0	xxxx	8	9	-1	7.32	7.28	33+0	0	216	9.95	0.19	1	1	4 + 5	0	0	1	0	2	0	xxxx	0	0	xxxx	0	xxxx	12	1	1	0	0
42	1	2400	34.2	0	0	0	1	1	0	0	0	0	0	0	0	0	0	0	xxxx	8	9	-1	7.37	7.32	34+0	0	28	10.29	0.65	0	0	4 + 5	0	0	1	0	1	0	xxxx	0	0	xxxx	0	xxxx	8	1	1	0	0
43	0	2795	34.2	0	0	0	1	2	0	0	1	0	0	1	0	0	0	0	xxxx	6	9	-1	7.33	7.32	34+1	1	0	11.38	0.1	1	0	0	0	0	1	0	2	0	xxxx	0	0	xxxx	0	xxxx	15	1	7	0	0
44	0	2560	33.6	0	3	0	1	1	0	0	0	0	0	0	0	0	0	0	xxxx	9	10	-1	7.39	7.33	33+5	1	0	-1	-1	0	0	0	0	0	1	0	0	0	xxxx	0	0	xxxx	0	xxxx	9	1	1	0	0
45	0	1550	32	0	0	0	1	1	0	0	1	0	1	1	0	0	1	0	xxxx	6	7	-1	7.36	7.32	32+0	1	0	8.81	0.44	1	1	0	0	0	1	0	2	1	deciduite, plasmacellule	0	0	xxxx	0	xxxx	31	1	1	0	0
46	0	800	28	0	0	0	1	1	0	0	1	0	1	1	0	0	0	0	xxxx	7	8	-1	7.24	-1	28+0	1	0	19.56	0.44	0	0	0	0	0	0	0	1	0	xxxx	0	0	xxxx	0	xxxx	68	1	1	0	0
47	0	1860	31	0	0	0	1	1	0	3	0	0	0	0	0	0	0	0	xxxx	9	10	-1	-1	-1	31+0	1	0	6.98	0.05	0	0	0	0	0	1	3	2	0	xxxx	0	0	xxxx	0	xxxx	28	1	1	0	0
48	1	1560	30.6	0	0	1	1	1	1	0	0	0	0	0	0	0	0	0	xxxx	8	9	-1	7.37	-1	30+5	1	0	11.53	-1	0	0	0	0	0	1	0	2	0	xxxx	0	0	xxxx	0	xxxx	35	1	1	0	0
49	0	1490	30.6	0	0	1	1	1	1	0	1	1	0	1	0	0	0	0	xxxx	8	8	-1	7.38	-1	30+5	1	0	11.53	-1	0	0	0	0	0	1	0	2	0	xxxx	0	0	xxxx	0	xxxx	35	1	1	0	0
50	1	1150	28	0	5	0	1	1	0	0	1	0	1	0	0	0	0	0	xxxx	7	8	-1	7.29	7.21	28+0	1	0	11.42	0.85	0	0	0	0	0	0	2	1	0	xxxx	0	0	xxxx	0	xxxx	58	1	1	0	0
51	0	2480	34	0	0	0	1	1	0	0	0	0	0	0	0	0	0	0	xxxx	9	10	-1	7.38	7.35	34+0	0	9	11.47	0.61	0	0	0	0	0	1	0	2	0	xxxx	0	0	xxxx	0	xxxx	7	1	1	0	0
52	1	1420	33.8	1	0	0	1	1	1	0	0	0	0	0	0	0	0	0	xxxx	8	9	-1	-1	-1	33+6	1	0	11.64	1.23	15	1	0	0	0	0	2	2	1	S3 G2 in membr. + CA lieve nel piatto	0	0	xxxx	0	xxxx	32	1	1	0	0
53	0	830	25	0	0	0	1	1	0	0	1	2	1	0	0	1	1	0	xxxx	4	8	-1	7.28	7.25	24+6	0	70	13.61	0.24	1	1	4 + 5	0	0	1	0	2	1	S2 G1	0	0	xxxx	0	xxxx	92	1	1	0	0
54	1	2370	33	0	3	0	0	0	0	0	0	0	0	0	0	0	0	0	xxxx	8	9	-1	7.33	7.28	33+0	0	0	9.36	0.22	0	0	0	0	0	1	0	0	0	xxxx	0	0	xxxx	0	xxxx	12	1	1	0	0
55	0	590	25	0	0	0	1	2	0	0	1	0	1	1	0	0	1	0	xxxx	5	8	-1	7.28	7.26	25+0	1	0	10.84	1.47	0	0	0	0	1	0	0	2	0	xxxx	0	0	xxxx	0	xxxx	242	1	1	0	1
56	1	2000	33	0	0	0	1	2	0	0	1	0	0	0	0	0	0	0	xxxx	5	8	-1	7.27	7.02	32+6	0	23	6.03	0.49	0	0	4 + 5	0	0	1	0	1	0	xxxx	0	0	xxxx	0	xxxx	21	1	1	0	0
57	1	1600	30.8	0	0	1	1	1	1	0	1	0	1	1	0	0	1	0	xxxx	6	9	-1	7.37	7.32	30+6	1	0	7.28	-1	2	1	4 + 5	1	0	0	0	1	1	focolai di villite cronica	0	0	xxxx	0	xxxx	37	1	1	0	0
58	1	980	30.8	1	0	1	1	1	1	0	1	0	0	1	1	0	2	0	SF 10 ml/kg	3	5	7	7.36	7.32	30+6	1	0	7.28	-1	2	1	4 + 5	1	0	0	0	1	1	focolai di villite cronica	0	0	xxxx	0	xxxx	56	1	1	0	0
59	1	1490	30.8	0	0	1	1	1	1	0	1	0	0	1	0	0	1	0	xxxx	7	8	-1	7.36	7.32	30+6	1	0	7.28	-1	2	1	4 + 5	1	0	0	0	1	1	focolai di villite cronica	0	0	xxxx	0	xxxx	37	1	1	0	0
60	1	2000	34	0	0	0	0	1	0	0	0	0	0	0	0	0	0	0	xxxx	9	10	10	7.33	7.25	34+0	0	0	8.42	-1	15	0	0	0	0	1	0	2	1	focolai di subcorionite	0	0	xxxx	0	xxxx	19	1	0	0	0
61	0	1490	30.1	0	0	0	1	1	0	0	1	0	1	1	0	0	1	0	xxxx	5	7	8	7.38	7.33	30+1	1	0	11.22	0.65	1	1	4 + 5	0	0	1	0	2	0	xxxx	0	0	xxxx	0	xxxx	46	1	1	0	0
62	0	1660	32	0	2	0	1	1	1	0	1	0	0	1	0	0	0	0	xxxx	6	8	-1	7.37	7.34	32+0	1	0	7.12	0.23	0	0	0	0	0	0	2	2	0	xxxx	0	0	xxxx	0	xxxx	30	1	1	0	0
63	0	1230	32	1	2	0	1	1	1	0	1	2	1	1	0	0	1	0	xxxx	5	9	-1	7.3	7.25	32+0	1	0	7.12	0.23	0	0	0	0	0	0	2	2	0	xxxx	0	0	xxxx	0	xxxx	28	1	1	0	0
64	1	2150	34.3	0	0	1	1	1	1	0	0	0	0	0	0	0	0	0	xxxx	7	8	-1	7.42	7.33	34+2	1	0	6.38	-1	1	1	0	0	0	1	0	2	0	xxxx	0	0	xxxx	0	xxxx	19	1	1	0	0
65	0	1360	34.3	1	0	1	1	1	1	0	0	0	0	0	0	0	0	0	xxxx	9	10	-1	7.37	7.3	34+2	1	0	6.38	-1	1	1	0	0	0	1	0	2	0	xxxx	0	0	xxxx	0	xxxx	26	1	1	0	0
66	0	1050	29.6	0	0	0	1	1	0	0	1	1	1	1	0	0	0	0	xxxx	8	9	-1	7.35	-1	29+4	1	0	12.25	1.7	0	0	0	0	1	0	0	2	0	xxxx	0	0	xxxx	0	xxxx	53	1	1	0	0
67	1	1780	33.6	0	0	0	1	1	0	1	1	0	1	1	0	0	0	0	xxxx	7	8	-1	7.31	7.15	33+4	1	0	18.1	1	0	0	0	0	0	1	0	0	0	xxxx	0	0	xxxx	0	xxxx	25	1	1	0	0
68	1	1370	31	0	0	0	1	1	0	0	1	0	0	1	0	0	0	0	xxxx	5	9	-1	7.32	7.26	31+0	1	0	16.77	0.4	7	7	4 + 5	0	0	1	0	2	0	xxxx	0	0	xxxx	0	xxxx	37	1	1	0	0
69	1	1440	33	1	0	0	1	1	0	0	0	0	0	0	0	0	0	0	xxxx	8	9	-1	7.39	7.34	33+0	1	0	9.25	-1	1	1	0	0	0	0	2	2	1	esiti di villite	0	0	xxxx	0	xxxx	31	1	1	0	0
70	0	1380	34	1	1	0	1	1	0	0	1	0	0	1	0	0	0	0	xxxx	5	8	8	7.32	7.22	34+0	1	0	8.96	3.35	1	1	0	0	0	0	0	2	0	xxxx	0	0	xxxx	0	xxxx	25	1	1	0	0
71	0	2330	34	0	0	0	1	1	1	0	0	0	0	0	0	0	0	0	xxxx	7	8	-1	7.36	7.35	34+0	1	0	8.62	-1	1	0	0	0	0	0	0	0	0	xxxx	0	0	xxxx	0	xxxx	16	1	1	0	0
72	0	1700	34	1	0	0	1	1	1	0	0	0	0	0	0	0	0	0	xxxx	7	8	-1	7.31	7.25	34+0	1	0	8.62	-1	1	0	0	0	0	0	0	0	0	xxxx	0	0	xxxx	0	xxxx	16	1	1	0	0
73	0	2560	34	0	0	0	0	0	0	0	0	0	0	0	0	0	0	0	xxxx	9	10	-1	7.4	7.32	33+4	0	72	18.26	0.39	1	0	4 + 5	0	0	1	0	0	0	xxxx	0	0	xxxx	0	xxxx	6	1	0	0	0
74	1	1765	34	1	0	0	1	1	1	0	0	0	0	0	0	0	0	0	xxxx	9	10	-1	7.39	7.34	34+0	1	0	15.23	0.32	8	8	1	0	0	0	2	2	0	xxxx	0	0	xxxx	0	xxxx	11	1	1	0	0
75	1	1745	34	1	0	0	1	1	1	0	0	0	0	0	0	0	0	0	xxxx	9	10	-1	7.4	7.34	34+0	1	0	15.23	0.32	8	8	1	0	0	0	2	2	0	xxxx	0	0	xxxx	0	xxxx	11	1	1	0	0
76	1	1720	33.7	0	0	0	1	1	0	0	0	0	0	0	0	0	0	0	xxxx	9	10	-1	7.21	-1	33+5	1	0	9.41	-1	1	7	0	0	0	0	0	2	0	xxxx	0	0	xxxx	0	xxxx	20	1	1	0	0
77	1	1470	34.6	1	0	0	1	1	0	0	1	1	0	0	0	0	0	0	xxxx	8	9	-1	7.35	-1	34+4	1	0	7.64	-1	0	0	0	0	0	0	0	2	1	S2 G1	0	0	xxxx	0	xxxx	31	1	1	0	0
78	0	1440	31.2	0	0	0	1	2	0	0	1	2	1	0	0	0	0	0	xxxx	6	8	-1	7.36	7.32	31+1	1	0	6.95	11.63	1	1	0	1	0	1	2	2	1	S1 G2 focale	1	1	S1 G2 vasi piatto amnioc.	0	xxxx	54	1	1	0	0
79	1	1390	32	0	0	0	1	1	0	0	1	3	1	0	0	0	1	0	xxxx	6	8	-1	7.39	7.32	32+0	1	0	11.6	0.54	1	0	0	0	0	0	0	2	0	xxxx	0	0	xxxx	0	xxxx	43	1	1	0	0
80	0	740	25.4	0	0	1	1	1	0	3	1	0	1	1	0	0	1	0	xxxx	5	8	8	7.43	-1	24+6	0	96	15.15	2.07	1	0	4 + 5	0	0	1	0	2	1	S3 G2	1	1	S3 G2	0	xxxx	113	1	1	0	0
81	1	1960	33.7	0	1	0	0	1	0	0	1	0	0	1	1	0	1	0	xxxx	1	7	-1	7.34	-1	33+5	0	12	10.6	0.95	0	0	5	0	0	1	3	2	1	S1 G2 focale	0	0	xxxx	1	insufficienza resp. dopo tracheostom.	71	0	1	0	0
82	0	3240	34.7	0	1	0	1	1	0	0	0	0	0	0	0	0	0	0	xxxx	9	10	10	7.37	7.33	34+5	0	0	6.89	0.39	0	0	0	0	0	1	0	0	0	xxxx	0	0	xxxx	0	xxxx	5	1	1	0	0
83	0	1420	36.2	1	0	0	0	1	0	0	0	0	0	0	0	0	0	0	xxxx	9	10	-1	7.2	7.15	36+1	0	13	7.86	0.24	0	0	5	0	0	1	2	0	0	xxxx	0	0	xxxx	0	xxxx	31	1	1	0	0
84	1	1940	32.8	0	0	0	1	1	1	0	1	0	1	0	0	0	1	0	xxxx	6	7	9	7.38	7.28	32+6	1	0	5.87	0.05	0	0	2	0	0	0	0	2	0	xxxx	0	0	xxxx	0	xxxx	3	1	1	0	0
85	1	1280	32.8	1	0	0	1	1	1	0	1	1	1	0	0	0	1	0	xxxx	8	9	-1	7.36	7.33	32+6	1	0	5.87	0.05	0	0	2	0	0	0	0	2	0	xxxx	0	0	xxxx	0	xxxx	30	1	1	0	0
86	0	1975	31.6	0	0	0	1	1	0	0	0	0	0	0	0	0	0	0	xxxx	8	8	-1	7.38	7.29	31+4	1	0	13.2	1.1	1	0	0	0	0	0	0	2	0	xxxx	0	0	xxxx	0	xxxx	32	1	1	0	0
87	0	1490	35	1	3	0	1	1	0	0	1	0	0	1	0	0	0	0	xxxx	8	8	-1	7.44	7.33	35+0	0	0	8.87	-1	0	0	0	0	0	1	0	2	1	villite focale	0	0	xxxx	0	xxxx	21	1	1	0	0
88	0	2160	34	0	0	0	1	2	0	0	1	0	1	1	0	0	0	0	xxxx	5	9	-1	7.3	-1	34+0	1	0	9.02	0.91	0	0	0	0	0	0	0	2	0	xxxx	0	0	xxxx	0	xxxx	8	1	1	0	0
89	1	360	25.8	1	0	0	1	1	0	1	1	2	1	1	0	0	1	0	xxxx	6	8	-1	7.26	7.18	25+6	1	0	7.47	0.55	0	0	0	0	0	0	2	2	0	xxxx	0	0	xxxx	0	xxxx	192	1	0	0	1
90	1	1800	33	0	0	0	1	1	1	0	1	0	1	1	0	0	2	0	xxxx	8	7	8	7.32	7.29	33+0	1	0	9.35	0.05	1	0	0	0	0	0	0	2	0	xxxx	0	0	xxxx	0	xxxx	31	1	1	0	0
91	1	1610	33	0	0	0	1	1	1	0	0	0	0	0	0	0	0	0	xxxx	9	10	-1	7.3	7.23	33+0	1	0	9.35	0.05	1	0	0	0	0	0	0	2	0	xxxx	0	0	xxxx	0	xxxx	31	1	1	0	0
92	1	2285	33.7	0	0	0	1	1	0	0	1	0	0	1	0	0	0	0	xxxx	6	7	7	7.26	7.21	33+5	1	0	9.63	0.36	1	1	1	0	0	1	0	2	0	xxxx	0	0	xxxx	0	xxxx	26	1	1	0	0
93	0	2100	34.8	0	3	0	1	1	0	0	0	0	0	0	0	0	0	0	xxxx	9	10	-1	7.36	7.28	34+6	1	0	-1	-1	0	1	0	0	0	0	0	2	0	xxxx	0	0	xxxx	0	xxxx	11	1	1	0	0
94	1	1830	33.7	0	0	0	1	1	1	0	0	0	0	0	0	0	0	0	xxxx	8	9	-1	7.38	-1	32+5	0	144	13.5	0.44	7	9	4 + 5	0	0	0	0	2	0	xxxx	0	0	xxxx	0	xxxx	15	1	1	0	0
95	1	2040	33.7	0	0	0	1	1	1	0	0	0	0	0	0	0	0	0	xxxx	8	9	-1	7.33	-1	33+5	0	144	13.5	0.44	7	9	4 + 5	0	0	0	0	2	0	xxxx	0	0	xxxx	0	xxxx	15	1	1	0	0
96	1	1680	32.6	0	0	0	1	1	1	0	0	0	0	0	0	0	0	0	xxxx	9	10	-1	7.38	7.34	33+3	0	5	18.2	0.21	1	1	4 + 5	0	0	1	0	2	0	xxxx	0	0	xxxx	0	xxxx	25	1	1	0	0
97	1	1590	32.6	0	0	0	1	1	1	0	0	0	0	0	0	0	0	0	xxxx	9	10	-1	7.39	7.33	33+3	0	5	18.2	0.21	1	1	4 + 5	0	0	1	0	2	0	xxxx	0	0	xxxx	0	xxxx	25	1	1	0	0
98	0	780	30	1	0	1	1	1	1	0	1	0	0	1	1	0	1	0	xxxx	2	8	-1	7.24	7.19	30+0	1	0	7.29	-1	11	0	0	0	1	0	2	2	0	xxxx	0	0	xxxx	0	xxxx	68	1	1	1	1
99	0	1070	30	0	0	1	1	1	1	0	1	0	1	1	0	0	0	0	xxxx	5	7	-1	7.33	7.28	30+0	1	0	7.29	-1	11	0	0	0	1	0	0	2	0	xxxx	0	0	xxxx	0	xxxx	80	1	1	0	0
100	0	1145	30	0	0	1	1	1	1	0	1	0	1	1	0	0	0	0	xxxx	7	8	-1	7.35	7.31	30+0	1	0	7.29	-1	11	0	0	0	1	0	0	2	0	xxxx	0	0	xxxx	0	xxxx	68	1	1	0	0
101	0	1800	32	0	0	0	1	1	1	0	1	0	1	0	0	0	0	0	xxxx	8	9	-1	7.36	-1	32+0	1	0	7.41	-1	0	0	0	0	0	0	0	2	0	xxxx	0	0	xxxx	0	xxxx	25	1	1	0	0
102	0	1570	32	0	0	0	1	1	1	0	1	0	1	1	0	0	1	0	xxxx	6	9	-1	7.37	7.27	32+0	1	0	7.41	-1	0	0	0	0	0	0	0	2	0	xxxx	0	0	xxxx	0	xxxx	25	1	1	0	0
103	1	550	26.4	1	2	0	1	1	0	0	1	0	0	1	1	1	3	0	SF 30 ml TOT + Adr. 0,02mL TOT + Surf.200mg/kg	1	3	5	7.06	-1	26+3	1	0	15.46	-1	0	0	0	0	0	0	2	2	0	xxxx	0	0	xxxx	0	xxxx	111	1	1	0	1
104	0	1630	31.2	0	0	1	1	1	0	1	1	2	1	1	0	0	2	0	xxxx	6	7	-1	7.37	7.33	22+5	0	60	10.09	0.1	7	1	5	0	0	1	2	2	0	xxxx	0	0	xxxx	0	xxxx	30	1	1	0	0
105	1	1280	30.1	0	0	0	1	1	1	0	1	1	1	0	0	0	0	0	xxxx	7	8	-1	7.33	7.25	30+1	1	0	5.85	0.25	0	0	0	0	0	0	0	2	0	xxxx	0	0	xxxx	0	xxxx	56	1	1	0	0
106	1	915	30.1	1	0	0	1	1	1	0	1	0	0	1	1	0	1	0	xxxx	-1	-1	-1	7.33	7.25	30+1	1	0	5.85	0.25	0	0	0	0	0	0	2	2	0	xxxx	0	0	xxxx	1	insufficienza resp.	20	0	1	0	1
107	0	1680	32.6	0	0	0	1	1	1	0	1	1	1	1	0	0	1	0	xxxx	5	9	-1	7.35	7.31	32+4	0	0	13.56	0.1	0	0	5	1	0	1	0	1	0	xxxx	0	0	xxxx	0	xxxx	31	1	1	0	0
108	1	2340	32.6	0	0	0	1	1	1	0	1	1	1	0	0	0	1	0	xxxx	6	8	-1	7.37	7.26	32+4	0	0	13.56	0.1	0	0	5	1	0	1	0	1	0	xxxx	0	0	xxxx	0	xxxx	31	1	1	0	0
109	0	1670	32	0	0	1	1	1	0	0	1	0	1	1	0	0	2	0	10 ml/kg SF + 12ml/kg sangue	3	6	7	7.32	-1	32+0	1	0	-1	-1	0	0	0	0	0	0	0	0	0	xxxx	0	0	xxxx	0	xxxx	27	1	1	0	0
110	0	1460	33.3	1	0	0	1	1	0	0	0	0	0	0	0	0	0	0	xxxx	8	10	10	7.38	-1	33+2	1	0	6.49	0.25	0	0	0	0	0	0	0	2	0	xxxx	0	0	xxxx	0	xxxx	20	1	1	0	0
111	1	1100	32	1	1	0	1	1	0	0	0	0	0	0	0	0	0	0	xxxx	8	9	-1	7.4	7.34	32+0	1	0	8.42	1.3	0	1	0	0	0	0	0	2	1	villite focale	0	0	xxxx	0	xxxx	36	1	1	0	0
112	0	610	24	0	5	1	1	1	0	0	1	0	1	1	0	0	0	0	xxxx	8	9	-1	7.46	7.46	24+0	1	0	14.83	4.91	1	1	4 + 8 + 10	1	0	1	0	2	0	xxxx	1	0	xxxx	1	shock settico	9	0	1	0	1
113	1	2740	34	0	0	0	1	1	1	0	1	0	0	0	0	0	0	0	xxxx	8	9	-1	7.39	7.32	34+0	1	0	8.99	3.61	0	0	8	0	0	0	0	0	1	S1 G2	1	1	S1 G1	0	xxxx	11	1	1	0	0
114	1	2140	34	0	0	0	1	1	1	0	1	0	0	0	1	0	3	0	xxxx	5	7	-1	7.39	7.32	34+0	1	0	8.99	3.61	0	0	8	0	0	0	0	0	1	S1 G2	1	1	S1 G2	0	xxxx	84	1	1	0	0
115	1	890	28	0	0	1	1	1	0	0	1	3	1	0	0	0	1	0	xxxx	6	8	9	7.37	7.29	29+0	1	0	7.39	-1	0	1	0	0	1	0	0	2	0	xxxx	0	0	xxxx	0	xxxx	90	1	1	0	1
116	0	2410	33	0	0	0	1	1	0	0	0	0	0	0	0	0	0	0	xxxx	8	8	-1	7.38	7.32	34+0	1	0	10.05	-1	5 + 15	0	0	0	0	0	0	2	0	xxxx	0	0	xxxx	0	xxxx	13	1	1	0	0
117	1	2030	34	0	0	0	1	1	0	0	1	0	1	0	0	0	1	0	xxxx	8	8	-1	7.38	7.34	34+0	0	28	12.27	0.21	0	0	14	0	0	1	0	0	1	S2 G1 focali	0	0	xxxx	0	xxxx	9	1	1	0	0
118	0	2075	31.8	0	0	1	1	1	1	0	1	0	1	1	0	0	0	0	xxxx	7	8	-1	7.46	7.34	31+6	1	0	13.5	0.17	0	0	0	0	0	1	0	2	1	villite focale	0	0	xxxx	0	xxxx	16	1	1	0	0
119	0	1930	31.8	0	0	1	1	1	1	0	1	0	0	1	0	0	0	0	xxxx	6	8	-1	7.31	7.2	31+6	1	0	13.5	0.17	0	0	0	0	0	1	0	2	1	villite focale	0	0	xxxx	0	xxxx	16	1	1	0	0
120	0	530	24.6	0	0	0	1	1	1	0	1	1	0	1	1	0	3	0	xxxx	3	7	-1	-1	-1	24+5	0	0	32.88	0.67	0	0	8	0	0	1	1	2	1	S2 G1	1	0	xxxx	0	xxxx	209	1	1	0	0
121	0	490	24.6	1	0	0	1	1	1	0	1	1	1	0	1	1	2	0	xxxx	5	8	-1	7.42	7.39	24+5	0	0	32.88	0.67	0	0	8	0	0	1	1	2	1	corionite e subcor.	1	0	xxxx	1	prematurità estrema	1	0	1	0	-1
122	1	2475	34.4	0	0	0	1	1	0	0	1	0	0	1	0	0	0	0	xxxx	9	9	-1	7.36	7.28	34+3	1	0	12.53	0.23	1	1	0	0	0	0	0	2	0	xxxx	0	0	xxxx	0	xxxx	11	1	1	0	0
123	0	560	25	1	0	0	1	1	0	0	1	2	1	0	0	0	1	0	xxxx	4	8	-1	-1	7.17	25+0	1	0	10.26	1.31	0	0	0	0	1	0	0	2	0	xxxx	0	0	xxxx	0	xxxx	93	1	1	0	1
124	1	2410	32	0	0	0	0	0	0	0	0	0	0	0	0	0	0	0	xxxx	9	9	-1	7.39	7.31	31+6	0	24	11.56	0.93	5 + 13	0	5	0	0	1	0	1	0	xxxx	0	0	xxxx	0	xxxx	9	1	1	0	0
125	0	995	28	0	0	1	1	1	1	0	1	1	1	1	0	0	0	0	xxxx	7	9	-1	7.36	-1	28+0	0	0	9.1	-1	7	0	0	0	0	1	0	2	0	xxxx	0	0	xxxx	0	xxxx	62	1	1	0	0
126	0	1260	28	0	0	1	1	1	1	0	1	0	0	1	1	1	2	1	xxxx	2	7	7	7.34	-1	28+0	0	0	9.1	-1	7	0	0	0	0	1	3	2	0	xxxx	0	0	xxxx	0	xxxx	91	1	1	0	0
127	0	650	28	1	0	1	1	1	1	0	1	1	0	0	1	1	2	0	xxxx	2	7	-1	-1	-1	28+0	0	0	9.1	-1	7	0	0	0	0	1	2	2	0	xxxx	0	0	xxxx	1	TTTS	5	0	1	0	0
128	0	1930	33.7	0	0	0	1	1	0	0	0	0	0	0	0	0	0	0	xxxx	9	10	-1	7.37	7.34	33+5	1	0	8.84	0.05	0	0	0	0	0	0	0	2	1	focolai villite e perivillite cronica	0	0	xxxx	0	xxxx	19	1	1	0	0
129	0	1720	33	0	0	1	1	1	1	0	0	0	0	0	0	0	0	0	xxxx	8	9	-1	7.38	7.23	33+0	1	0	16.94	0.47	0	0	0	0	0	0	0	0	0	xxxx	0	0	xxxx	0	xxxx	27	1	1	0	0
130	1	1480	33	1	0	1	1	1	1	0	1	1	0	1	1	0	3	1	adrenalina in TET 1 dose	-1	-1	-1	7.35	7.3	33+0	1	0	16.94	0.47	0	0	0	0	0	0	0	0	0	xxxx	0	0	xxxx	1	ADPKD	1	0	1	0	-1
131	0	2235	34	0	0	1	1	1	0	0	0	0	0	0	0	0	0	0	xxxx	9	10	10	7.39	7.33	32+4	0	240	12.66	0.97	1	7	5 + 4 + 16	0	0	1	0	2	0	xxxx	0	0	xxxx	0	xxxx	7	1	1	0	0
132	1	2015	34	0	0	0	1	1	0	0	0	0	0	0	0	0	0	0	xxxx	9	10	10	7.4	7.35	30+5	0	600	10.25	0.57	1	1	0	0	0	1	2	2	0	xxxx	0	0	xxxx	0	xxxx	8	1	1	0	0
133	1	440	25.8	1	0	0	1	1	0	0	1	2	1	1	0	0	1	0	xxxx	4	8	-1	7.22	7.16	25+6	1	0	15.73	0.64	0	0	0	0	0	0	2	2	1	focolai villite e perivillite cronica	0	0	xxxx	1	prematurità estrema	10	0	1	0	0
134	1	880	27.6	0	3	0	1	1	0	2	1	0	1	1	0	0	0	0	xxxx	6	9	-1	7.31	7.24	27+4	1	0	10.87	-1	5	0	0	0	0	0	0	2	0	xxxx	0	0	xxxx	0	xxxx	72	1	1	0	1
135	0	1650	31.7	0	0	0	1	1	1	0	1	0	1	1	0	0	0	0	xxxx	6	8	-1	7.34	7.29	31+0	0	96	14.05	4.45	1	3	5	0	1	1	0	2	0	xxxx	1	0	xxxx	0	xxxx	25	1	1	0	0
136	0	1490	31.7	0	0	0	1	1	1	0	1	2	1	1	0	0	1	0	xxxx	6	8	-1	7.33	7.28	31+0	0	96	14.05	4.45	1	3	5	0	1	1	0	2	0	xxxx	1	0	xxxx	0	xxxx	25	1	1	0	0
137	0	1370	31	0	0	0	1	1	0	0	1	1	1	1	0	0	1	0	xxxx	7	8	-1	7.35	7.28	31+0	1	0	11.37	0.58	0	0	0	0	1	0	0	0	0	xxxx	0	0	xxxx	0	xxxx	45	1	1	0	0
138	1	1705	34.1	1	0	0	1	1	0	0	0	0	0	0	0	0	0	0	xxxx	9	10	-1	7.35	7.3	34+1	1	0	8.76	1.44	1	1	0	0	1	0	2	2	0	xxxx	0	0	xxxx	0	xxxx	14	1	1	0	0
139	0	830	26.1	0	0	1	1	1	0	0	1	0	1	1	0	0	1	0	xxxx	5	7	-1	7.41	7.36	26+1	1	0	14.44	1.6	0	0	0	-1	0	0	0	1	1	S2 G2	1	1	S1 G1	1	meningite da Serratia	18	0	2	0	1
140	1	1040	28.1	0	5	0	1	1	0	0	1	0	1	1	0	0	0	0	xxxx	8	9	-1	7.27	-1	28+1	1	0	5.58	0.85	0	0	0	0	0	0	2	2	0	xxxx	0	0	xxxx	0	xxxx	51	1	1	0	0
141	0	2160	34	0	4	0	1	1	0	0	0	0	0	0	0	0	0	0	xxxx	9	10	10	7.35	7.32	34+0	1	0	9.77	0.11	0	0	0	0	0	0	0	2	0	xxxx	0	0	xxxx	0	xxxx	13	1	1	0	0
142	1	1700	30.8	0	0	0	1	1	0	0	1	1	1	0	0	0	0	0	xxxx	7	8	-1	7.4	7.33	27+3	0	576	10	0.33	15	1	4 + 5	0	0	1	0	2	0	xxxx	0	0	xxxx	0	xxxx	37	1	1	0	0
143	1	2080	30	0	0	0	1	1	0	0	1	0	1	1	0	0	0	0	xxxx	8	8	-1	7.38	7.27	30+0	1	0	10.54	10	0	0	0	1	0	1	0	2	0	xxxx	1	0	xxxx	0	xxxx	43	1	1	0	0
144	1	600	24.3	0	3	0	1	1	1	3	1	0	0	1	1	1	3	1	adrenalina in TET 1 dose + Curosurf	1	3	5	-1	-1	22+4	0	288	10.03	0.24	0	0	4+5	0	0	1	1	1	1	S1 G2	0	1	S2 G1	1	prematurità estrema	19	0	7	1	0
145	0	1730	33.6	0	0	1	1	1	1	0	0	0	0	0	0	0	0	0	xxxx	9	10	10	7.3	7.32	33+4	0	1	12.95	0.66	2	1	5	0	0	1	0	2	0	xxxx	0	0	xxxx	0	xxxx	16	1	1	0	0
146	1	1830	33.6	0	0	1	1	1	1	0	1	0	0	1	0	0	1	0	xxxx	7	9	-1	7.35	7.3	33+4	0	1	12.95	0.66	2	1	5	0	0	1	0	2	0	xxxx	0	0	xxxx	0	xxxx	16	1	1	0	0
147	1	1990	32.3	0	0	0	0	1	0	0	0	0	0	0	0	0	0	0	xxxx	8	9	-1	7.37	-1	32+2	1	0	14.51	0.78	0	1	5	0	0	1	0	2	1	S1 G2	0	0	xxxx	0	xxxx	21	1	1	0	0
148	1	1200	27	0	0	0	1	1	0	0	1	2	1	1	0	0	1	0	xxxx	5	9	-1	7.35	7.31	27+0	1	0	12.76	15.29	0	0	0	0	0	0	0	2	0	xxxx	0	0	xxxx	0	xxxx	83	1	1	0	1
149	1	1865	34.6	0	4	0	0	1	0	0	0	0	0	0	0	0	0	0	xxxx	9	10	-1	7.36	-1	34+1	0	78	10.31	0.49	0	0	5	0	0	1	0	0	1	S1 G1	0	0	xxxx	0	xxxx	17	1	1	0	0
150	0	1960	33.3	0	0	1	0	1	1	0	0	0	0	0	0	0	0	0	xxxx	9	10	-1	7.34	7.21	33+0	0	31	10.94	0.32	1	1	5	0	0	1	0	2	0	xxxx	0	0	xxxx	0	xxxx	18	1	1	0	0
151	1	1900	33.3	0	0	1	0	1	1	0	1	0	0	1	0	0	0	0	xxxx	6	9	-1	7.34	7.32	33+0	0	31	10.94	0.32	1	1	5	0	0	1	0	2	0	xxxx	0	0	xxxx	0	xxxx	18	1	1	0	0
152	1	1120	31.8	1	0	0	1	1	0	0	1	0	1	1	0	0	0	0	xxxx	6	9	-1	7.36	7.29	31+5	1	0	10.61	0.62	0	0	0	0	1	0	0	2	1	villite focale	0	0	xxxx	0	xxxx	45	1	1	0	0
153	0	1260	29.6	0	0	0	1	1	1	0	1	1	1	0	0	0	0	0	xxxx	8	8	-1	7.44	7.37	29+0	1	0	10.92	1.4	1	1	0	0	0	0	0	2	0	xxxx	0	0	xxxx	0	xxxx	46	1	15	0	0
154	0	1370	29.8	0	0	1	1	1	1	0	1	0	1	1	0	0	1	0	xxxx	5	7	-1	-1	-1	23+1	0	1104	10.07	1.13	2	1	5	0	0	1	0	2	1	corio aggiunta per funisite	0	1	S1 G1	0	xxxx	44	1	2	1	0
155	1	1595	31	0	0	1	1	1	1	0	0	0	0	0	0	0	0	0	xxxx	6	8	-1	7.31	7.23	31+0	1	0	9.24	1.51	0	0	0	0	1	1	0	2	0	xxxx	0	0	xxxx	0	xxxx	38	1	1	0	0
156	0	1450	31	0	0	1	1	1	1	0	1	0	1	0	0	0	0	0	xxxx	8	9	-1	7.32	7.26	31+0	1	0	9.24	1.51	0	0	0	0	1	1	0	2	0	xxxx	0	0	xxxx	0	xxxx	52	1	1	0	0
157	0	1115	32.1	1	0	1	1	1	1	0	1	0	1	0	0	0	0	0	xxxx	8	9	-1	7.32	7.22	32+1	1	0	7.89	0.75	1	0	0	0	0	0	2	2	0	xxxx	0	0	xxxx	0	xxxx	43	1	1	0	0
158	1	1495	32.1	0	0	1	1	1	1	0	0	0	0	0	0	0	0	0	xxxx	8	9	-1	7.33	7.22	32+1	1	0	7.89	0.75	1	0	0	0	0	0	2	2	0	xxxx	0	0	xxxx	0	xxxx	32	1	1	0	0
159	1	2740	33.9	0	5	0	0	1	0	0	1	0	0	1	0	0	0	0	xxxx	5	8	-1	7.31	-1	31+6	0	336	12.3	2.53	1	1	4	1	0	1	0	2	1	S2 G2	1	1	S2 G1	0	xxxx	23	1	1	0	0
160	1	1250	31	0	0	1	1	1	0	0	1	0	1	1	0	0	0	0	xxxx	8	8	-1	7.36	-1	31+0	1	0	9.03	0.8	2 + 15	17	14	0	0	0	0	2	0	xxxx	0	0	xxxx	0	xxxx	45	1	1	0	0
161	1	2150	33.3	0	0	0	1	1	0	0	1	0	1	1	0	0	0	0	xxxx	5	9	-1	7.38	-1	33+2	1	0	18.17	0.61	0	0	0	0	0	1	0	0	0	xxxx	0	0	xxxx	0	xxxx	10	1	1	0	0
162	0	1800	33.3	0	4	1	1	1	1	0	0	0	0	0	0	0	0	0	xxxx	8	9	-1	7.38	-1	33+2	1	0	-1	-1	0	0	0	0	0	0	0	2	0	xxxx	0	0	xxxx	0	xxxx	17	1	1	0	0
163	1	1400	33.3	1	4	1	1	1	1	0	1	0	0	1	0	0	0	0	xxxx	8	9	-1	7.31	-1	33+2	1	0	-1	-1	0	0	0	0	0	0	0	2	0	xxxx	0	0	xxxx	0	xxxx	24	1	1	0	0
164	1	1460	33.3	1	4	1	1	1	1	0	0	0	0	0	0	0	0	0	xxxx	8	9	-1	7.32	-1	33+2	1	0	-1	-1	0	0	0	0	0	0	0	2	0	xxxx	0	0	xxxx	0	xxxx	24	1	1	0	0
165	1	1460	34.2	1	5	0	1	1	0	0	1	0	1	1	0	0	0	0	xxxx	7	9	-1	7.31	-1	34+1	1	0	7.02	0.48	0	0	0	0	0	0	0	2	0	xxxx	0	0	xxxx	0	xxxx	34	1	1	0	0
166	0	590	25.7	1	0	0	1	1	0	-1	1	0	1	1	0	0	-1	0	xxxx	8	9	-1	7.28	-1	25+5	1	0	15.73	0.48	0	0	0	0	1	0	0	2	0	xxxx	0	0	xxxx	0	xxxx	164	1	1	0	0
167	0	2000	33.2	0	0	1	1	1	1	0	0	0	0	0	0	0	0	0	xxxx	8	9	-1	7.35	-1	33+1	0	3	12.49	0.89	0	0	0	0	0	1	0	-1	0	xxxx	0	0	xxxx	0	xxxx	13	1	1	0	0
168	1	2290	33.2	0	0	1	1	1	1	0	0	0	0	0	0	0	0	0	xxxx	9	10	-1	7.37	-1	33+1	0	3	12.49	0.89	0	0	0	0	0	1	0	-1	0	xxxx	0	0	xxxx	0	xxxx	13	1	1	0	0
169	1	1870	34.9	0	0	0	1	1	0	0	1	0	1	0	0	0	0	0	xxxx	7	10	-1	7.31	-1	34+6	1	0	11.7	1.09	0	0	0	0	0	0	0	0	0	xxxx	0	0	xxxx	0	xxxx	11	1	1	0	0
170	1	1900	34.2	0	0	0	1	1	0	0	0	0	0	0	0	0	0	0	xxxx	8	9	-1	7.33	-1	34+1	1	0	-1	-1	0	0	0	0	1	0	0	2	0	xxxx	0	0	xxxx	0	xxxx	21	1	1	0	0
171	1	1860	31.4	0	0	0	0	1	0	0	1	0	0	1	0	0	0	0	xxxx	5	8	-1	7.17	-1	31+3	0	10	24.17	0.36	0	0	-1	0	0	1	0	2	0	xxxx	0	0	xxxx	0	xxxx	32	1	1	0	0
172	1	1470	31	0	0	0	1	1	0	3	0	0	0	0	0	0	0	0	xxxx	9	9	-1	7.4	7.34	31+0	1	0	8.77	-1	2 + 15	2	0	0	0	0	3	2	0	xxxx	0	0	xxxx	0	xxxx	122	1	1	0	0
173	0	1490	30.4	0	3	0	1	2	0	0	1	0	0	1	1	0	2	0	xxxx	4	5	7	7.34	7.32	30+3	1	0	13.6	-1	0	1	5	0	0	1	0	2	0	xxxx	0	0	xxxx	0	xxxx	69	1	1	0	0
174	1	1200	28.8	0	0	0	1	1	0	0	1	0	1	1	0	0	0	0	caffeina 100 mg/kg	6	7	9	7.39	-1	28+6	0	1	-1	-1	15	7	14	0	0	1	0	2	1	S1 G2	0	0	xxxx	0	xxxx	88	1	1	0	0
175	0	407	22.7	0	1	1	1	2	0	2	1	0	0	1	1	1	3	1	xxxx	1	3	5	-1	-1	19+6	0	480	13.69	10.1	5	8	6 + 10	1	0	1	1	2	1	S3 G2	1	1	S2 G2	1	prematurità estrema e IVH	5	0	1	0	0
176	0	700	31.6	1	0	0	1	1	0	3	1	0	1	0	0	0	1	0	xxxx	7	8	-1	-1	-1	31+4	1	0	7.68	-1	1	1	0	0	0	0	0	2	0	xxxx	0	0	xxxx	0	xxxx	367	1	1	0	0
177	1	1384	28	0	0	0	1	1	0	0	0	0	0	0	0	0	0	0	xxxx	8	9	-1	7.38	-1	28+0	1	0	20	0.71	2	2	0	0	0	0	0	2	0	xxxx	0	0	xxxx	0	xxxx	96	1	1	0	0
178	0	1288	29.3	0	5	0	1	1	1	0	1	0	1	1	0	0	1	0	xxxx	6	8	8	7.41	7.35	29+1	0	26	-1	-1	0	1	0	0	0	1	2	2	0	xxxx	0	0	xxxx	0	xxxx	41	1	1	0	0
179	1	1420	29.3	0	5	0	1	1	1	0	1	0	0	1	1	0	1	0	xxxx	3	6	8	7.39	7.33	29+1	0	26	-1	-1	0	1	0	0	0	1	3	2	0	xxxx	0	0	xxxx	0	xxxx	69	1	1	0	0
180	1	2075	34.6	0	0	0	1	1	1	0	0	0	0	0	0	0	0	0	xxxx	9	10	10	7.22	7.21	34+4	1	0	-1	-1	0	0	0	0	0	0	0	2	0	xxxx	0	0	xxxx	0	xxxx	6	1	1	0	0
181	0	2000	34.6	0	0	0	1	1	1	0	0	0	0	0	0	0	0	0	xxxx	9	10	10	7.34	7.31	34+4	1	0	-1	-1	0	0	0	0	0	0	0	2	0	xxxx	0	0	xxxx	0	xxxx	6	1	1	0	0
182	1	790	24.6	0	3	0	0	1	0	1	1	1	0	1	1	1	1	0	xxxx	6	5	8	7.35	7.26	24+5	0	0	21.47	6.38	7	1	5 + 10	1	0	1	0	2	1	S3 G2	1	0	xxxx	0	xxxx	109	1	7	0	1
183	1	1100	28.8	0	0	0	1	1	1	0	1	2	0	1	1	0	2	0	xxxx	6	8	-1	7.36	-1	26+6	0	336	13.3	0.92	1	1	0	0	0	1	0	2	0	xxxx	0	0	xxxx	0	xxxx	96	1	1	0	1
184	1	950	28.8	0	0	0	1	1	1	0	1	0	1	1	1	1	1	0	xxxx	6	8	-1	7.37	-1	26+6	0	336	13.3	0.92	1	1	0	0	0	1	0	2	0	xxxx	0	0	xxxx	0	xxxx	88	1	1	0	1
185	1	1440	31.3	0	0	1	1	1	1	0	1	0	1	1	0	0	0	0	xxxx	7	9	-1	7.36	7.31	31+2	1	0	-1	-1	0	0	0	0	0	0	0	2	0	xxxx	0	0	xxxx	0	xxxx	46	1	1	0	0
186	1	480	31.3	1	0	1	1	1	1	0	1	1	0	0	1	0	1	0	xxxx	5	7	-1	7.3	-1	31+2	1	0	-1	-1	0	0	0	0	0	0	2	2	0	xxxx	0	0	xxxx	0	xxxx	125	1	1	0	1
187	0	2525	34	0	3	0	1	1	0	0	0	0	0	0	0	0	0	0	xxxx	9	10	10	7.34	7.29	33+6	0	14	9.01	0.12	0	0	5 + 4	0	0	1	0	0	0	xxxx	0	0	xxxx	0	xxxx	9	1	1	0	0
188	1	2245	34	0	0	0	1	1	0	0	0	0	0	0	0	0	0	0	xxxx	9	9	-1	7.39	7.32	34+0	1	0	-1	-1	0	0	0	0	0	0	0	0	1	S2 G1	0	0	xxxx	0	xxxx	5	1	1	0	0
189	1	2480	34.8	0	0	0	1	1	0	0	0	0	0	0	0	0	0	0	xxxx	8	9	-1	7.29	7.23	34+6	1	0	12.49	0.24	1	1	0	0	0	1	0	2	0	xxxx	0	0	xxxx	0	xxxx	7	1	1	0	0
190	1	1160	29.3	0	5	0	1	1	1	0	1	1	0	1	1	1	1	0	xxxx	6	7	9	7.32	7.31	29+0	0	47	5.68	0.05	0	1	5	0	0	1	0	2	0	xxxx	0	0	xxxx	0	xxxx	41	1	1	0	0
191	1	1330	29.3	0	5	0	1	1	1	0	0	0	0	0	0	0	0	0	xxxx	8	10	10	7.31	7.28	29+2	1	0	5.68	0.05	0	1	5	0	0	1	0	2	0	xxxx	0	0	xxxx	0	xxxx	34	1	1	0	0
192	0	1490	32.3	0	0	0	1	1	1	0	0	0	0	0	0	0	0	0	xxxx	9	10	10	7.39	7.27	32+2	1	0	9.33	-1	0	0	0	0	0	1	2	2	0	xxxx	0	0	xxxx	0	xxxx	31	1	1	0	0
193	0	1300	32.3	1	0	0	1	1	1	0	0	0	0	0	0	0	0	0	xxxx	8	9	-1	7.33	7.32	32+2	1	0	9.33	-1	0	0	0	0	0	1	0	2	0	xxxx	0	0	xxxx	0	xxxx	31	1	1	0	0
194	1	1450	31	0	3	0	1	1	0	0	1	0	0	1	1	1	2	0	xxxx	4	7	-1	7.22	7.02	31+0	1	0	11.47	0.68	0	0	0	0	0	0	0	0	0	xxxx	0	0	xxxx	1	Ebstein	6	0	1	0	0
195	1	1700	31.3	0	0	0	1	1	0	2	1	0	0	1	0	0	0	0	xxxx	9	9	-1	7.39	7.35	31+1	0	5	9.21	0.85	1	1	5	1	0	1	3	2	0	xxxx	0	0	xxxx	0	xxxx	51	1	1	0	0
196	1	750	27.6	0	0	0	1	1	0	0	1	2	0	1	1	0	1	0	xxxx	5	8	-1	7.32	7.3	27+5	1	0	14.55	1.95	0	0	0	0	1	0	0	2	0	xxxx	0	0	xxxx	0	xxxx	85	1	1	0	0
197	1	980	29.3	0	3	0	1	2	0	0	1	2	1	1	0	0	1	0	xxxx	6	8	-1	7.14	7.12	29+2	1	0	14.26	0.58	0	0	0	0	1	0	0	1	0	xxxx	0	0	xxxx	0	xxxx	46	1	1	0	0
198	0	860	32	1	0	0	1	1	0	0	1	0	1	1	0	0	0	0	xxxx	8	9	-1	7.36	7.32	32+0	1	0	10.63	0.19	0	0	0	0	0	0	0	2	0	xxxx	0	0	xxxx	0	xxxx	63	1	1	0	0
199	1	1840	33.8	0	2	0	1	2	1	0	1	0	1	1	0	0	1	0	xxxx	1	6	8	7.17	-1	33+6	0	0	13.15	0.94	0	3	0	0	0	0	0	0	0	xxxx	0	0	xxxx	0	xxxx	14	1	1	0	0
200	1	2200	33.8	0	2	0	1	2	1	0	1	0	0	1	0	0	0	0	xxxx	6	9	-1	7.29	-1	33+6	0	0	13.15	0.94	0	3	0	0	0	0	0	0	0	xxxx	0	0	xxxx	0	xxxx	14	1	1	0	0
201	0	1875	33.3	0	0	1	1	1	1	0	0	0	0	0	0	0	0	0	xxxx	9	9	-1	7.36	7.33	33+2	1	0	4.88	0.36	0	0	0	0	0	1	0	2	0	xxxx	0	0	xxxx	0	xxxx	14	1	1	0	0
202	0	1690	33.3	0	0	1	1	1	1	0	0	0	0	0	0	0	0	0	xxxx	8	9	-1	7.35	7.3	33+2	1	0	4.88	0.36	0	0	0	0	0	1	0	2	0	xxxx	0	0	xxxx	0	xxxx	21	1	1	0	0
203	0	1810	33.3	0	0	1	1	1	1	0	1	1	1	1	0	0	1	0	xxxx	5	9	-1	7.32	7.28	33+2	1	0	4.88	0.36	0	0	0	0	0	1	0	2	0	xxxx	0	0	xxxx	0	xxxx	18	1	1	0	0
204	0	2460	34	0	0	0	0	1	0	0	1	0	1	0	0	0	0	0	xxxx	6	8	-1	7.4	-1	34+0	1	0	-1	-1	1	0	0	0	0	1	0	2	0	xxxx	0	0	xxxx	0	xxxx	9	1	1	0	0
205	1	1040	27.6	0	0	1	1	2	1	0	1	0	1	1	0	0	0	0	xxxx	5	7	-1	-1	-1	27+4	1	0	10.79	2.5	0	1	5	0	0	1	3	2	0	xxxx	0	0	xxxx	0	xxxx	104	1	1	0	0
206	0	760	27.6	1	0	1	1	2	1	0	1	2	0	1	1	0	2	0	xxxx	5	6	8	-1	-1	27+4	1	0	10.79	2.5	0	1	5	0	0	1	3	2	0	xxxx	0	0	xxxx	0	xxxx	161	1	1	0	0
207	1	1810	34.4	0	0	0	1	1	1	0	0	0	0	0	0	0	0	0	xxxx	9	10	10	7.37	7.29	34+3	1	0	-1	-1	0	0	0	0	0	0	1	0	0	xxxx	0	0	xxxx	0	xxxx	12	1	1	0	0
208	1	1970	34.4	0	0	0	1	1	1	0	0	0	0	0	0	0	0	0	xxxx	9	10	10	7.37	7.32	34+3	1	0	-1	-1	0	0	0	0	0	0	0	0	0	xxxx	0	0	xxxx	0	xxxx	12	1	1	0	0
209	1	980	26	0	1	0	1	2	0	0	1	2	0	1	1	1	1	0	xxxx	5	8	-1	7.23	7.21	26+0	1	0	9.58	1.02	0	0	0	0	0	1	0	1	0	xxxx	0	0	xxxx	0	xxxx	113	1	1	0	1
210	1	1830	33.8	0	0	0	1	2	0	0	0	0	0	0	0	0	0	0	xxxx	9	10	-1	7.4	7.35	33+4	0	42	7.8	0.53	0	0	4 + 5	0	0	1	0	2	0	xxxx	0	0	xxxx	0	xxxx	12	1	1	0	0
211	0	2340	34	0	0	1	1	1	1	0	0	0	0	0	0	0	0	0	xxxx	9	9	-1	7.39	7.32	34+5	1	0	11.84	0.15	0	0	0	0	0	0	0	0	0	xxxx	0	0	xxxx	0	xxxx	8	1	1	0	0
212	0	1825	34	0	0	1	1	1	1	0	1	0	1	1	0	0	1	0	xxxx	7	8	-1	7.28	7.27	34+5	1	0	11.84	0.15	0	0	0	0	0	0	0	0	0	xxxx	0	0	xxxx	0	xxxx	8	1	1	0	0
213	1	1610	33	0	0	0	1	1	0	0	0	0	0	0	0	0	0	0	xxxx	7	9	-1	7.41	7.34	28+0	0	816	9.64	0.41	1	1	0	0	0	1	0	2	1	S2G1	0	0	xxxx	0	xxxx	16	1	1	0	0
214	1	1980	32.6	0	0	0	1	1	0	1	0	0	0	0	0	0	0	0	xxxx	9	9	-1	7.25	7.21	32+4	1	0	-1	-1	15	1	0	0	0	0	0	2	0	xxxx	0	0	xxxx	0	xxxx	17	1	1	0	0
215	1	1250	28.6	0	0	0	1	1	0	2	1	0	1	1	0	0	0	0	xxxx	6	8	-1	7.2	7.11	28+4	1	0	10.76	0.92	5	5	4	0	0	0	0	2	0	xxxx	0	0	xxxx	0	xxxx	51	1	1	0	0
216	1	1085	32	1	0	0	1	1	0	1	0	0	0	0	0	0	0	0	xxxx	8	9	-1	7.3	7.27	32+0	1	0	14.24	0.98	0	0	0	0	0	0	0	2	1	S1G1	0	0	xxxx	0	xxxx	43	1	1	0	0
217	1	1740	32	0	1	0	1	1	0	0	0	0	0	0	0	0	0	0	xxxx	8	9	-1	7.35	7.32	32+0	1	0	8.25	0.36	0	0	0	0	1	0	0	2	0	xxxx	0	0	xxxx	0	xxxx	25	1	1	0	0
218	1	1570	31	0	0	0	1	1	0	0	1	0	0	1	1	0	1	0	xxxx	5	7	-1	7.33	7.27	29+4	0	240	14.99	0.11	15	1	0	1	0	1	0	2	1	S2G1	1	1	S2G1	0	xxxx	43	1	7	0	0
219	1	2300	34	0	0	0	1	1	0	0	0	0	0	0	0	0	0	0	xxxx	9	10	10	7.4	7.35	34+0	1	0	9.87	-1	0	0	0	0	0	0	0	2	0	xxxx	0	0	xxxx	0	xxxx	6	1	1	0	0
220	0	1720	29.6	0	0	0	0	0	0	-1	1	0	1	1	0	0	1	0	xxxx	7	8	-1	7.39	7.31	29+5	0	1	14.14	6.94	0	0	5	1	0	1	0	1	1	S2G2	1	1	S1G1	0	xxxx	33	1	1	0	0
221	1	2560	34.4	0	0	0	0	1	0	0	1	0	0	1	0	0	0	0	xxxx	5	7	-1	7.44	7.37	34+3	0	14	6.62	-1	0	0	5	0	0	1	0	0	0	xxxx	0	0	xxxx	0	xxxx	8	1	1	0	0
222	1	2290	34.2	0	0	0	1	1	0	0	0	0	0	0	0	0	0	0	xxxx	9	10	10	7.39	7.39	34+2	1	0	9.5	0.59	0	0	0	0	0	0	2	2	0	xxxx	0	0	xxxx	0	xxxx	6	1	1	0	0
223	0	890	27.4	0	0	0	1	1	1	0	1	1	1	0	0	0	0	0	xxxx	8	9	-1	7.41	7.36	27+3	1	0	14.78	0.31	6	1	4 + 5	0	0	1	0	2	0	xxxx	0	0	xxxx	0	xxxx	65	1	1	0	0
224	0	990	27.4	0	0	0	1	1	1	0	1	0	1	1	0	0	0	0	xxxx	7	8	-1	7.39	7.33	26+6	0	111	14.78	0.31	6	1	4 + 5	0	0	1	0	2	0	xxxx	0	0	xxxx	0	xxxx	71	1	1	0	0
225	0	2130	33	0	0	0	1	1	0	0	0	0	0	0	0	0	0	0	xxxx	8	8	-1	7.39	7.32	33+0	1	0	8.71	0.29	0	0	0	0	0	0	0	2	0	xxxx	0	0	xxxx	0	xxxx	16	1	1	0	0
226	1	2075	33.7	0	0	1	1	1	1	0	0	0	0	0	0	0	0	0	xxxx	9	10	10	7.35	7.29	33+5	0	5	8.78	0.51	0	0	4 + 5	0	0	1	0	1	0	xxxx	0	0	xxxx	0	xxxx	10	1	1	0	0
227	1	2345	33.7	0	0	1	1	1	1	0	0	0	0	0	0	0	0	0	xxxx	9	10	10	7.38	7.33	33+5	0	5	8.78	0.51	0	0	4 + 5	0	0	1	0	1	1	villite e perivillite	0	0	xxxx	0	xxxx	10	1	1	0	0
228	1	1760	30.7	0	1	0	1	1	0	0	0	0	0	0	0	0	0	0	xxxx	9	10	10	7.34	7.2	30+5	1	0	11.59	0.74	0	0	5	0	0	1	2	2	0	xxxx	0	0	xxxx	0	xxxx	45	1	1	0	0
229	0	2660	34.4	0	0	0	1	1	1	1	0	0	0	0	0	0	0	0	xxxx	8	10	10	7.4	7.33	34+3	1	0	-1	-1	0	0	0	0	0	0	0	2	0	xxxx	0	0	xxxx	0	xxxx	8	1	1	0	0
230	0	2725	34.4	0	0	0	1	1	1	1	0	0	0	0	0	0	0	0	xxxx	9	10	10	7.4	7.4	34+3	1	0	-1	-1	0	0	0	0	0	0	0	2	0	xxxx	0	0	xxxx	0	xxxx	8	1	1	0	0
231	0	610	23.8	0	5	0	1	1	0	1	1	0	0	1	1	0	1	0	xxxx	6	7	-1	7.34	-1	23+6	1	0	9	0.68	0	0	0	0	0	0	0	0	0	xxxx	0	0	xxxx	1	IVH e prematurità estrema	25	0	1	0	0
232	0	2430	33.7	0	0	0	1	1	0	0	0	0	0	0	0	0	0	0	xxxx	8	9	-1	7.33	7.23	33+5	1	0	11.31	0.11	0	0	1	0	0	0	0	1	0	xxxx	0	0	xxxx	0	xxxx	6	1	1	0	0
233	1	2400	33	0	0	0	1	1	0	0	0	0	0	0	0	0	0	0	xxxx	8	9	-1	7.36	7.35	33+0	1	0	10.75	-1	0	0	0	0	0	0	0	2	0	xxxx	0	0	xxxx	0	xxxx	36	1	1	0	0
234	0	1826	31	0	1	0	1	1	0	0	1	0	0	1	0	0	0	0	xxxx	7	9	-1	7.29	7.37	31+0	0	5	16.52	1.04	15	0	4 + 5	1	0	1	0	1	1	S1G2	1	1	S2G1	0	xxxx	34	1	1	0	0
235	0	1170	35	1	0	0	1	1	0	0	0	0	0	0	0	0	0	0	xxxx	9	10	10	-1	-1	35+0	1	0	10.65	1.19	0	0	0	0	0	0	2	0	0	xxxx	0	0	xxxx	0	xxxx	31	1	1	0	0
236	0	1155	34.6	1	0	0	1	1	0	0	0	0	0	0	0	0	0	0	xxxx	9	10	10	7.25	-1	34+4	1	0	12.06	-1	0	0	0	0	1	0	0	2	1	villite e perivillite, membrane indenni	0	0	xxxx	0	xxxx	30	1	1	0	0
237	0	1670	34	1	0	0	1	1	1	0	0	0	0	0	0	0	0	0	xxxx	9	10	10	7.37	7.34	34+0	1	0	10.72	-1	0	0	0	0	0	0	0	0	1	villite e perivillite, membrane indenni	0	0	xxxx	0	xxxx	20	1	1	0	0
238	0	1880	34	0	0	0	1	1	1	0	0	0	0	0	0	0	0	0	xxxx	9	10	10	7.38	7.34	34+0	1	0	10.72	-1	0	0	0	0	0	0	0	0	0	xxxx	0	0	xxxx	0	xxxx	20	1	1	0	0
239	0	1430	31	0	5	0	1	1	0	0	1	0	0	1	0	0	1	0	xxxx	8	10	10	7.3	7.27	31+0	1	0	10.83	-1	0	1	5	0	0	0	0	1	0	xxxx	0	0	xxxx	0	xxxx	30	1	1	0	0
240	0	2080	34	0	0	1	1	1	1	0	0	0	0	0	0	0	0	0	xxxx	9	10	10	7.39	7.36	34+0	1	0	5.79	-1	0	0	0	0	0	0	0	2	0	xxxx	0	0	xxxx	0	xxxx	26	1	1	0	0
241	1	2195	34	0	0	1	1	1	1	0	0	0	0	0	0	0	0	0	xxxx	9	10	10	7.4	7.36	34+0	1	0	5.79	-1	0	0	0	0	0	0	0	2	0	xxxx	0	0	xxxx	0	xxxx	14	1	1	0	0
242	1	1210	31.3	1	0	0	1	1	0	2	1	0	1	1	0	0	0	0	xxxx	5	8	9	7.24	-1	31+2	1	0	10.59	1.28	0	0	0	0	0	0	2	1	1	massiva vilite cronica	0	0	xxxx	0	xxxx	36	1	1	0	0
243	1	1590	33.4	0	2	0	1	1	0	0	0	0	0	0	0	0	0	0	xxxx	8	9	-1	7.38	-1	33+3	1	0	10.43	1.8	7	2	0	0	0	1	0	2	1	S1G1	0	0	xxxx	0	xxxx	23	1	1	0	0
244	1	2230	33	0	0	0	0	1	0	0	0	0	0	0	0	0	0	0	xxxx	8	9	-1	7.31	-1	33	1	2	14.43	0.38	1	1	4 + 5	0	0	1	0	2	0	xxxx	0	0	xxxx	0	xxxx	23	1	1	0	0
245	0	2750	34	0	0	1	0	1	0	0	1	0	0	1	0	0	0	0	xxxx	5	8	8	7.36	7.26	34	0	8	9.05	0.11	0	0	5	0	0	1	0	0	0	xxxx	0	0	xxxx	0	xxxx	5	1	1	0	0
246	1	690	23	0	0	0	0	0	0	0	1	0	0	1	1	1	1	0	xxxx	1	3	-1	-1	-1	23	0	2	21.04	2.02	0	0	5	0	0	1	0	1	1	S3G2	1	1	S2G2	0	xxxx	131	1	1	0	0
247	1	2065	32.3	0	0	0	0	1	0	0	0	0	0	0	0	0	0	0	xxxx	9	10	10	7.39	7.32	32+2	0	9	15.52	1.24	1	1	4 + 5	1	0	1	0	2	0	xxxx	1	0	xxxx	0	xxxx	15	1	1	0	0
248	1	2515	33.7	0	0	0	1	1	0	0	0	0	0	0	0	0	0	0	xxxx	9	10	10	7.4	7.35	33+5	1	0	-1	-1	0	0	0	0	0	0	0	2	0	xxxx	0	0	xxxx	0	xxxx	6	1	1	0	0
249	0	1590	32.3	0	0	1	1	1	1	2	0	0	0	0	0	0	0	0	xxxx	9	10	10	7.36	7.32	32+2	0	2	11.93	0.9	0	0	0	0	0	1	0	2	0	xxxx	0	0	xxxx	0	xxxx	32	1	1	0	0
250	0	1710	32.3	0	0	1	1	1	1	2	1	0	1	0	0	0	1	0	xxxx	8	9	-1	-1	-1	32+2	0	2	11.93	0.9	0	0	0	0	0	1	0	2	0	xxxx	0	0	xxxx	0	xxxx	26	1	1	0	0
251	1	2300	34	0	0	0	1	1	0	0	0	0	0	0	0	0	0	0	xxxx	9	10	10	7.37	7.31	34	0	8	12.43	0.39	0	0	0	0	0	0	0	0	0	xxxx	0	0	xxxx	0	xxxx	6	1	0	0	0
252	1	1790	33.6	0	0	1	1	2	1	0	1	0	0	1	0	0	0	0	xxxx	6	9	-1	7.31	7.26	33+4	0	19	18.94	0.23	0	0	0	0	0	0	0	1	0	xxxx	0	0	xxxx	0	xxxx	9	1	0	0	0
253	1	2050	33.6	0	0	1	1	2	1	0	1	0	0	1	0	0	0	0	xxxx	5	8	-1	-1	7.25	33+4	0	19	18.94	0.23	0	0	0	0	0	0	0	1	0	xxxx	0	0	xxxx	0	xxxx	10	1	0	0	0
254	1	1280	29.4	0	0	0	1	1	0	0	1	0	0	1	1	0	1	0	xxxx	4	7	-1	7.42	7.28	29+3	0	1	-1	-1	0	0	0	0	0	1	0	2	1	S1 G2	0	1	S1 G1	0	xxxx	48	1	1	1	0
255	0	1850	32	0	0	0	1	1	0	0	1	0	0	1	0	0	0	0	xxxx	8	8	-1	7.37	7.32	29+3	0	432	9.33	0.05	1	0	0	1	0	1	0	2	1	S2 G2	0	1	S2 G2	0	xxxx	23	1	8	0	0
256	0	1460	32.8	1	0	1	1	1	1	0	1	0	1	1	0	0	1	0	xxxx	7	9	-1	7.37	7.31	32+6	1	0	-1	-1	0	0	0	0	0	1	2	2	0	xxxx	0	0	xxxx	0	xxxx	24	1	1	0	0
257	0	1685	32.8	0	0	1	1	1	1	0	0	0	0	0	0	0	0	0	xxxx	9	10	10	7.39	7.34	32+6	1	0	-1	-1	0	0	0	0	0	1	0	2	0	xxxx	0	0	xxxx	0	xxxx	21	1	1	0	0
258	0	1750	33.2	1	0	1	1	1	0	0	0	0	0	0	0	0	0	0	xxxx	9	10	10	-1	-1	33+2	1	0	7.6	-1	0	0	0	0	1	0	2	2	0	xxxx	0	0	xxxx	0	xxxx	16	1	1	0	0
259	1	1090	29.3	0	0	0	0	1	0	0	1	0	1	0	0	0	2	0	xxxx	8	9	-1	7.51	-1	29+2	0	4	17.02	2.36	1	1	4 + 5	0	0	1	0	2	0	xxxx	1	0	xxxx	1	sepsi e meningite da GBS	23	0	1	0	1
260	0	2270	32	0	0	0	0	1	0	3	1	0	0	1	1	0	2	0	xxxx	5	7	7	-1	-1	32+0	1	0	7.42	-1	1	1	0	0	0	1	3	2	1	S2 G2	0	1	infiamm cronica	0	xxxx	28	1	1	0	0
261	0	1160	28.7	0	3	0	1	1	0	0	1	0	1	1	0	0	1	0	xxxx	6	9	-1	7.35	-1	28+5	1	0	-1	-1	5	1	0	0	0	1	0	1	0	xxxx	0	0	xxxx	0	xxxx	88	1	0	0	1
262	1	1250	31.6	0	0	0	1	1	0	0	1	0	0	1	1	1	1	0	xxxx	5	7	-1	7.23	7.18	31+4	1	0	6.58	0.79	0	0	0	0	1	0	0	1	0	xxxx	0	0	xxxx	0	xxxx	48	1	1	0	0
263	1	830	27	0	5	0	1	1	0	2	1	1	0	0	1	0	1	0	xxxx	1	5	8	7.2	7.14	27+0	1	0	10.51	1.14	0	0	0	0	0	0	0	2	0	xxxx	0	0	xxxx	0	xxxx	98	1	1	0	0
264	0	2215	34	0	0	0	0	1	0	0	0	0	0	0	0	0	0	0	xxxx	7	8	-1	-1	-1	27+4	0	1104	13.25	0.05	1	3	1	0	0	1	2	2	0	xxxx	0	0	xxxx	0	xxxx	22	1	1	0	0
265	1	1430	30	0	0	1	1	1	1	2	1	0	0	1	0	0	0	0	xxxx	8	9	-1	7.39	7.32	29+1	0	144	7.75	2.42	1	1	4 + 5	0	0	1	0	2	0	xxxx	0	0	xxxx	0	xxxx	42	1	8	0	0
266	0	1490	30	0	0	1	1	1	1	2	1	1	1	1	0	0	1	0	xxxx	7	9	-1	-1	7.28	29+1	0	144	7.75	2.42	1	1	4 + 5	0	0	1	0	2	1	S1 G1	0	0	xxxx	0	xxxx	42	1	1	0	0
267	0	1675	34	1	5	0	1	2	1	0	1	1	1	1	1	0	0	0	xxxx	7	7	9	7.33	7.4	34+0	1	0	6.86	-1	0	1	0	0	0	1	0	2	0	xxxx	0	0	xxxx	0	xxxx	13	1	1	0	0
268	0	1930	34	0	5	0	1	2	1	0	1	1	0	0	1	0	0	0	xxxx	5	7	9	-1	-1	34+0	1	0	6.86	-1	0	1	0	0	0	1	0	2	0	xxxx	0	0	xxxx	0	xxxx	13	1	1	0	0
269	1	2565	34.2	0	0	0	1	1	0	0	0	0	0	0	0	0	0	0	xxxx	9	10	10	7.34	7.33	34+1	1	0	11.28	2.16	1	1	5	0	0	1	0	2	0	xxxx	0	0	xxxx	0	xxxx	12	1	1	0	0
270	0	2000	34.3	0	0	0	0	1	0	0	0	0	0	0	0	0	0	0	xxxx	9	10	10	7.34	7.3	34+1	0	17	9.73	0.21	0	0	4 + 5	0	0	1	0	0	0	xxxx	0	0	xxxx	0	xxxx	18	1	1	0	0
271	1	2440	34	0	0	1	1	1	1	0	0	0	0	0	0	0	0	0	xxxx	9	10	10	7.38	7.33	34+0	1	0	-1	-1	0	0	0	0	0	0	0	0	0	xxxx	0	0	xxxx	0	xxxx	11	1	1	0	0
272	1	2450	34	0	0	1	1	1	1	0	0	0	0	0	0	0	0	0	xxxx	9	10	10	7.37	7.32	34+0	1	0	-1	-1	0	0	0	0	0	0	0	0	0	xxxx	0	0	xxxx	0	xxxx	11	1	18	0	0
273	1	930	26	0	0	0	1	1	1	3	1	0	0	1	1	0	1	0	xxxx	4	8	-1	7.42	7.37	24+0	1	0	13.42	3.57	15	1	2 + 4	1	0	1	0	2	1	S2 G1	1	1	S1 G1	0	xxxx	84	1	1	0	0
274	1	860	26	0	0	0	1	1	1	3	1	0	0	1	1	1	2	0	xxxx	2	8	-1	7.4	7.37	24+0	0	336	13.42	3.57	15	1	2 + 4	1	0	1	0	2	1	S2 G2	1	1	S2 G1	0	xxxx	84	1	1	0	1
275	0	1600	31	0	1	0	1	1	0	0	1	0	1	1	0	0	1	0	xxxx	5	9	9	7.37	7.32	31+0	1	0	13.76	8.87	0	0	4	0	1	0	0	2	0	xxxx	1	0	xxxx	0	xxxx	31	1	1	0	0
276	1	1980	34.3	0	0	1	0	0	1	0	0	0	0	0	0	0	0	0	xxxx	9	9	-1	7.29	7.24	34+2	0	2	-1	-1	0	0	5	0	0	1	0	2	0	xxxx	0	0	xxxx	0	xxxx	13	1	1	0	0
277	0	1810	34.3	0	0	1	0	0	1	0	0	0	0	0	0	0	0	0	xxxx	7	9	-1	7.26	7.2	34+2	0	2	-1	-1	0	0	5	0	0	1	0	2	0	xxxx	0	0	xxxx	0	xxxx	13	1	1	0	0
278	0	520	23	0	0	0	0	0	0	0	1	0	0	0	1	1	2	0	xxxx	2	6	8	6.85	6.91	23+0	0	1	9.27	0.9	1	1	4 + 5	0	0	1	0	1	0	xxxx	0	0	xxxx	1	sepsi e perforazione int	8	0	1	0	1
279	0	995	28	0	0	0	1	1	0	0	1	1	1	0	0	0	0	0	xxxx	8	9	-1	7.32	7.3	28+0	1	0	-1	-1	0	0	0	0	1	0	0	2	0	xxxx	0	0	xxxx	0	xxxx	60	1	1	0	1
280	0	1755	33.4	0	0	0	0	1	0	1	0	0	0	0	0	0	0	0	xxxx	9	10	-1	-1	-1	33+3	0	12	11.76	1.9	0	0	5	0	1	1	0	2	0	xxxx	0	0	xxxx	0	xxxx	19	1	1	0	0
281	0	780	26	0	0	0	1	1	0	0	1	0	1	1	0	0	0	0	xxxx	7	8	8	7.39	7.37	25+5	0	37	29.73	3.61	5 + 8	8	4 + 5 + 10	0	0	1	0	1	1	S2 G1	1	0	xxxx	0	xxxx	102	1	1	0	1
282	1	725	26	0	0	1	1	1	0	1	1	2	1	1	0	0	1	0	xxxx	3	8	8	7.32	-1	26	1	0	7.61	0.25	1	1	0	0	1	0	0	2	0	xxxx	0	0	xxxx	0	xxxx	199	1	1	0	0
283	1	990	32.2	1	0	0	1	1	0	0	1	0	1	1	0	0	1	0	xxxx	6	8	-1	7.33	-1	32+1	1	0	7.46	1.67	1	1	0	0	0	1	0	2	0	xxxx	0	0	xxxx	0	xxxx	57	1	1	0	0
284	0	1490	30.7	0	0	0	1	2	1	0	1	0	1	1	0	0	1	0	xxxx	5	9	-1	7.39	7.33	30+5	1	0	11.82	-1	0	1	4	0	0	1	0	2	0	xxxx	0	0	xxxx	0	xxxx	43	1	1	0	0
285	0	1710	30.7	0	0	0	1	2	1	0	1	0	1	1	0	0	2	0	xxxx	6	7	8	7.39	7.33	30+5	1	0	11.82	-1	0	1	4	0	0	1	0	2	0	xxxx	0	0	xxxx	0	xxxx	43	1	1	0	0
286	0	1340	31	0	0	0	1	1	0	0	1	0	0	1	1	0	1	0	xxxx	5	7	-1	7.35	7.32	31+0	1	0	7.46	0.6	4 + 15	7	0	0	0	0	0	2	0	xxxx	0	0	xxxx	0	xxxx	52	1	1	0	0
287	0	1810	33.4	0	0	0	0	1	0	0	0	0	0	0	0	0	0	0	xxxx	9	9	-1	-1	-1	33+2	0	6	10.35	0.75	0	0	5	0	0	1	0	0	0	xxxx	0	0	xxxx	0	xxxx	19	1	1	0	0
288	0	1490	31	0	0	1	1	1	0	0	1	0	0	1	0	0	0	0	xxxx	8	9	-1	-1	-1	31+0	0	1	15.25	0.53	1	1	0	0	0	1	0	2	0	xxxx	0	0	xxxx	0	xxxx	37	1	1	0	0
289	0	1725	34	1	0	1	1	1	1	0	1	0	1	1	0	0	0	0	xxxx	6	9	-1	-1	-1	34+0	1	0	-1	-1	0	0	0	0	0	0	0	2	0	xxxx	0	0	xxxx	0	xxxx	15	1	1	0	0
290	1	1865	34	0	0	1	1	1	1	0	0	0	0	0	0	0	0	0	xxxx	8	10	10	-1	-1	34+0	1	0	-1	-1	0	0	0	0	0	0	0	2	0	xxxx	0	0	xxxx	0	xxxx	15	1	1	0	0
291	0	1290	30.4	0	0	0	1	1	0	0	1	0	1	1	0	0	0	0	xxxx	-1	-1	-1	7.39	7.35	30+3	1	0	9.2	0.05	0	0	0	0	0	1	0	0	0	xxxx	0	0	xxxx	0	xxxx	108	1	1	0	0
292	0	2145	34.3	0	0	0	1	0	0	0	0	0	0	0	0	0	0	0	xxxx	9	10	10	-1	-1	34+2	1	0	7.73	0.43	0	0	0	0	0	0	0	0	0	xxxx	0	0	xxxx	0	xxxx	11	1	1	0	0
293	1	1630	33.6	0	0	0	1	1	1	0	1	0	1	1	0	0	1	0	xxxx	7	8	-1	7.4	7.32	33+4	1	0	12.52	-1	2 + 7 + 5	1	5	0	0	0	2	2	0	xxxx	0	0	xxxx	0	xxxx	26	1	1	0	0
294	1	2355	33.6	0	0	0	1	1	1	0	0	0	0	0	0	0	0	0	xxxx	8	9	-1	-1	-1	33+4	1	0	12.52	-1	2 + 7 + 5	1	5	0	0	0	0	2	0	xxxx	0	0	xxxx	0	xxxx	26	1	1	0	0
295	0	1845	34	0	0	1	1	1	1	0	0	0	0	0	0	0	0	0	xxxx	9	10	10	7.4	7.35	33+6	0	16	-1	-1	0	0	5	0	0	0	2	0	1	deciduite + subcorionite cronica	0	0	xxxx	0	xxxx	10	1	1	0	0
296	1	1900	34	0	0	1	1	1	1	0	0	0	0	0	0	0	0	0	xxxx	9	10	10	7.41	7.36	33+6	0	16	-1	-1	0	0	5	0	0	0	0	0	1	deciduite + subcorionite cronica	0	0	xxxx	0	xxxx	10	1	1	0	0
297	1	1450	32.6	0	0	0	1	2	0	0	1	0	1	1	0	0	1	0	xxxx	5	8	-1	6.91	-1	32+4	1	0	19.08	1.72	1	0	0	1	1	0	0	2	0	xxxx	1	0	xxxx	0	xxxx	31	1	1	0	0
298	1	2275	24.8	0	0	0	1	1	0	0	0	0	0	0	0	0	0	0	xxxx	9	9	-1	7.38	7.31	34+6	0	1	-1	-1	0	0	0	0	0	0	0	0	0	xxxx	0	0	xxxx	0	xxxx	7	1	1	0	0
299	1	1945	34	0	0	0	0	1	0	0	0	0	0	0	0	0	0	0	xxxx	9	10	10	7.33	7.27	34+0	0	1	16.08	0.35	0	0	5	0	0	1	0	1	1	S1 G1	0	0	xxxx	0	xxxx	23	1	1	0	0
300	1	1780	33	0	0	0	0	1	0	0	0	0	0	0	0	0	0	0	xxxx	9	9	-1	-1	-1	33	0	5	9.3	3.89	1	0	5	0	0	1	0	1	0	xxxx	0	0	xxxx	0	xxxx	25	1	1	0	0
301	1	1700	30.4	0	0	0	1	1	0	0	1	0	1	0	0	0	0	0	xxxx	7	9	-1	-1	-1	30+3	1	0	9.37	0.26	0	0	0	0	0	0	0	2	0	xxxx	0	0	xxxx	0	xxxx	37	1	1	0	0
302	1	1150	27.8	0	0	1	0	1	0	0	1	0	1	1	0	0	1	0	xxxx	6	8	-1	-1	-1	27+6	0	4	15.79	0.15	0	0	5	0	0	1	0	1	0	xxxx	0	0	xxxx	0	xxxx	67	1	1	0	0
303	1	2020	34	0	0	0	1	1	0	0	0	0	0	0	0	0	0	0	xxxx	9	10	10	-1	-1	34	1	1	12.77	0.43	4 + 15	1	4 + 5	0	0	1	2	2	0	xxxx	0	0	xxxx	0	xxxx	18	1	1	0	0
304	1	1880	30.4	0	0	1	1	2	1	0	1	0	0	1	0	0	0	0	xxxx	7	8	-1	7.34	7.32	30+3	1	0	8.74	1.58	8	1	5	0	0	1	0	2	0	xxxx	0	0	xxxx	0	xxxx	34	1	1	0	0
305	1	880	30	1	1	0	1	1	0	0	1	0	1	1	0	0	1	0	xxxx	8	8	-1	-1	-1	30	1	0	6.68	-1	0	0	0	0	0	0	2	2	0	xxxx	0	0	xxxx	0	xxxx	53	1	1	0	0
306	1	1210	30.6	0	0	0	1	1	0	3	0	0	0	0	0	0	0	0	xxxx	8	9	-1	7.47	7.34	30+4	0	360	11.98	0.68	1	1	0	0	0	1	3	2	1	S3 G1	0	0	xxxx	0	xxxx	60	1	1	0	0
307	1	770	25	0	3	0	1	1	0	0	1	0	0	1	1	1	2	0	xxxx	5	8	-1	7.44	-1	25+0	1	0	-1	-1	0	0	0	0	0	0	0	0	0	xxxx	0	0	xxxx	0	xxxx	171	1	1	0	0
308	1	2290	34.2	0	5	0	1	1	1	0	0	0	0	0	0	0	0	0	xxxx	9	10	10	7.29	7.31	34+1	1	0	7.34	-1	0	0	0	0	0	0	0	2	0	xxxx	0	0	xxxx	0	xxxx	10	1	1	0	0
309	1	1960	34.2	0	5	0	1	1	1	0	0	0	0	0	0	0	0	0	xxxx	8	9	-1	7.24	7.25	34+1	1	0	7.34	-1	0	0	0	0	0	0	0	2	0	xxxx	0	0	xxxx	0	xxxx	10	1	1	0	0
310	0	2215	34.2	0	5	0	1	1	1	0	1	0	0	1	0	0	1	0	xxxx	6	7	8	7.25	7.21	34+1	1	0	7.34	-1	0	0	0	0	0	0	0	2	0	xxxx	0	0	xxxx	0	xxxx	10	1	1	0	0
311	1	2140	33.8	0	0	1	1	1	1	3	0	0	0	0	0	0	0	0	xxxx	8	9	-1	-1	-1	33+6	0	3	6.36	-1	0	3	4	0	0	0	0	2	1	focolai subcorionite acuta	0	0	xxxx	0	xxxx	17	1	1	0	0
312	1	1815	33.8	0	0	1	1	1	1	3	0	0	0	0	0	0	0	0	xxxx	8	9	-1	-1	-1	33+6	0	3	6.36	-1	0	3	4	0	0	0	0	2	0	xxxx	0	0	xxxx	0	xxxx	26	1	1	0	0
313	0	1830	32.6	0	2	0	0	0	0	0	0	0	0	0	0	0	0	0	xxxx	7	8	-1	-1	-1	32+4	0	5	9.46	0.47	0	0	4 + 5	0	0	0	0	1	0	xxxx	0	0	xxxx	0	xxxx	26	1	1	0	0
314	0	1830	33.7	0	0	1	1	2	0	0	1	0	0	1	1	0	0	0	xxxx	4	8	-1	-1	-1	33+5	0	6	8.56	1.62	0	0	-1	-1	0	1	-1	2	0	xxxx	0	0	xxxx	0	xxxx	23	1	1	0	0
315	1	1440	31	0	0	1	1	1	1	0	1	1	1	1	0	0	0	0	xxxx	8	9	-1	-1	-1	31	1	0	6.55	0.27	1	0	0	0	1	0	-1	2	0	xxxx	0	0	xxxx	0	xxxx	43	1	1	0	0
316	0	1700	31	0	0	1	1	1	1	0	1	1	1	1	0	0	1	0	xxxx	6	9	-1	-1	-1	31	1	0	6.55	0.27	1	0	0	0	1	0	-1	2	0	xxxx	0	0	xxxx	0	xxxx	43	1	1	0	0
317	0	970	29	0	5	0	1	1	0	0	1	2	1	1	0	0	1	0	xxxx	5	8	-1	7.38	-1	24	0	816	9.73	0.44	1	8	7	0	0	1	3	2	0	xxxx	0	0	xxxx	0	xxxx	133	1	1	0	0
318	1	1410	33	0	5	1	1	2	1	0	1	0	1	1	0	0	1	0	xxxx	5	8	-1	7.02	6.91	33+0	1	0	9.1	0.15	0	8	0	0	1	0	-1	2	0	xxxx	0	0	xxxx	0	xxxx	29	1	1	0	0
319	1	1700	33	0	5	1	1	2	1	0	1	0	0	1	1	0	1	0	xxxx	7	8	-1	7.14	7.14	33+0	1	0	9.1	0.15	0	8	0	0	1	0	-1	2	0	xxxx	0	0	xxxx	0	xxxx	29	1	1	0	0
320	0	740	24.8	0	0	0	1	1	0	1	1	2	0	1	1	1	1	0	xxxx	4	8	-1	7.38	7.42	24+6	0	5	-1	-1	0	0	0	0	0	1	0	1	1	S3 G2	0	1	S1 G1	0	xxxx	218	1	2	0	1
321	1	1340	32.3	1	0	0	1	1	0	0	1	0	1	1	0	0	0	0	xxxx	7	9	-1	-1	-1	32+2	1	0	-1	-1	0	0	0	-1	0	0	0	2	0	xxxx	0	0	xxxx	0	xxxx	57	1	1	0	0
322	1	1090	29.6	0	0	0	1	2	0	0	1	1	1	1	0	0	0	0	xxxx	7	8	-1	7.35	7.29	29+4	1	0	10.54	2.07	6	1	0	0	1	0	0	2	0	xxxx	0	0	xxxx	0	xxxx	57	1	1	0	0
323	1	2200	33.8	0	0	1	1	1	1	0	0	0	0	0	0	0	0	0	xxxx	9	10	10	-1	-1	33+6	1	0	-1	-1	1	1	0	0	0	0	0	2	0	xxxx	0	0	xxxx	0	xxxx	8	1	1	0	0
324	0	1650	33.8	0	0	1	1	1	1	2	1	0	1	0	0	0	1	0	xxxx	6	9	-1	7.21	7.3	33+6	1	0	-1	-1	2	2	0	0	0	0	0	2	0	xxxx	0	0	xxxx	0	xxxx	14	1	1	0	0
325	0	1840	33.8	0	0	1	1	1	1	0	0	0	0	0	0	0	0	0	xxxx	9	10	10	-1	-1	33+6	1	0	-1	-1	3	3	0	0	0	0	0	2	0	xxxx	0	0	xxxx	0	xxxx	14	1	1	0	0
326	0	1730	32.3	0	0	0	1	1	0	0	0	0	0	0	0	0	0	0	xxxx	8	9	-1	-1	-1	32+2	1	0	19.83	-1	0	0	5	0	0	0	0	1	0	xxxx	0	0	xxxx	0	xxxx	30	1	1	0	0
327	0	2100	32.2	0	1	0	0	0	0	0	0	0	0	0	0	0	0	0	xxxx	9	10	10	7.4	7.35	32+0	0	7	15.24	1.05	0	0	4 + 5	0	0	0	0	0	0	xxxx	0	0	xxxx	0	xxxx	18	1	1	0	0
328	0	1650	33.6	0	0	0	1	1	1	0	0	0	0	0	0	0	0	0	xxxx	9	10	10	7.43	7.33	33+5	1	0	7.07	0.05	0	0	0	0	0	0	0	2	0	xxxx	0	0	xxxx	0	xxxx	25	1	1	0	0
329	0	1490	33.6	1	0	0	1	1	1	0	0	0	0	0	0	0	0	0	xxxx	8	9	-1	7.43	7.39	33+5	1	0	7.07	0.05	0	0	0	0	0	0	0	2	0	xxxx	0	0	xxxx	0	xxxx	25	1	1	0	0
330	0	1840	34.8	0	0	1	1	1	0	0	0	0	0	0	0	0	0	0	xxxx	8	10	10	-1	-1	34+6	1	0	12.28	-1	7	0	2	0	0	0	2	2	0	xxxx	0	0	xxxx	0	xxxx	24	1	1	0	0
331	0	1495	34	1	0	0	1	1	1	0	1	0	1	0	0	0	0	0	xxxx	6	9	-1	-1	-1	34	1	0	9.3	0.21	1	1	0	0	0	0	0	2	0	xxxx	0	0	xxxx	0	xxxx	28	1	1	0	0
332	0	1570	34	1	0	0	1	1	1	0	1	0	1	0	0	0	0	0	xxxx	8	9	-1	-1	-1	34	1	0	9.3	0.21	1	1	0	0	0	0	0	2	0	xxxx	0	0	xxxx	0	xxxx	28	1	1	0	0
333	1	1600	34	1	0	0	1	1	1	0	0	0	0	0	0	0	0	0	xxxx	8	9	-1	-1	-1	34	1	0	9.3	0.21	1	1	0	0	0	0	0	2	0	xxxx	0	0	xxxx	0	xxxx	28	1	1	0	0
334	0	1300	30	0	3	0	1	1	1	0	1	1	0	1	0	0	0	0	xxxx	7	9	-1	7.32	7.33	29+6	0	2.5	18	0.05	2 + 7	0	0	0	1	0	0	1	1	S2 G1	0	1	S1 G1	0	xxxx	37	1	2	1	0
335	0	1000	30	1	3	0	1	1	1	0	0	0	0	0	0	0	0	0	xxxx	8	9	-1	7.33	7.31	29+6	1	0	18	0.05	2 + 7	0	0	0	1	0	0	1	1	S1 G2	0	0	xxxx	0	xxxx	37	1	2	0	0
336	0	2270	34	0	0	0	1	1	0	0	0	0	0	0	0	0	0	0	xxxx	9	10	10	-1	-1	34+0	0	5	12.32	-1	0	0	0	0	0	0	0	0	0	xxxx	0	0	xxxx	0	xxxx	8	1	1	0	0
337	1	2725	34.6	0	0	0	1	1	0	0	0	0	0	0	0	0	0	0	xxxx	9	10	10	7.4	-1	34+4	1	0	12.14	0.65	0	0	0	0	0	0	0	0	0	xxxx	0	0	xxxx	0	xxxx	12	1	1	0	0
338	0	2305	33	0	4	0	1	1	0	0	0	0	0	0	0	0	0	0	xxxx	8	9	-1	7.29	7.21	33+0	0	8	10.55	0.6	2	0	5	0	0	0	0	1	1	S1 G1	0	0	xxxx	0	xxxx	13	1	1	0	0
339	1	1710	36.6	0	0	0	0	0	0	0	0	0	0	0	0	0	0	0	xxxx	6	9	-1	7.34	7.35	31+3	0	12	12.27	0.35	0	0	5	0	0	1	0	1	1	S1 G1	0	0	xxxx	0	xxxx	35	1	1	0	0
340	1	1350	29.6	0	0	0	1	2	0	0	1	0	0	0	1	1	3	1	Adrenalina in TET x 2 + atropina 0,5 x 2 in COV + 20ml/kg di SF + surf + Hco3 1 mEq/kg	1	2	8	-1	-1	28+5	0	168	11.46	0.45	1	1	4 + 5	0	0	1	1	2	0	xxxx	0	0	xxxx	0	xxxx	56	1	1	0	0
341	0	1285	34.7	1	3	0	1	1	0	0	0	0	0	0	0	0	0	0	xxxx	9	10	10	7.34	7.29	34+5	1	0	-1	-1	0	0	0	0	1	0	0	0	0	xxxx	0	0	xxxx	0	xxxx	30	1	1	0	0
342	0	820	29	1	0	0	1	1	0	0	1	2	1	1	0	0	1	0	xxxx	6	8	-1	7.37	7.32	29+0	1	0	10.14	0.5	0	0	5	0	1	0	2	2	0	xxxx	0	0	xxxx	0	xxxx	80	1	1	0	1
343	1	2590	34.6	0	0	0	1	1	0	0	0	0	0	0	0	0	0	0	xxxx	9	10	10	-1	-1	34+4	1	0	7.65	0.43	0	0	0	0	0	0	0	0	0	xxxx	0	0	xxxx	0	xxxx	20	1	1	0	0
344	0	1880	34	0	0	0	1	1	0	0	0	0	0	0	0	0	0	0	xxxx	9	9	-1	-1	-1	34+0	1	0	6.88	1.83	0	0	0	0	1	0	0	2	0	xxxx	0	0	xxxx	0	xxxx	12	1	1	0	0
345	1	2295	33.2	0	0	0	1	2	1	0	1	0	1	1	0	0	0	0	xxxx	6	8	-1	-1	-1	33+0	0	24	10.77	0.47	0	0	5	0	0	1	0	1	0	xxxx	0	0	xxxx	0	xxxx	15	1	1	0	0
346	0	1850	33.2	0	0	0	1	2	1	0	1	0	1	1	0	0	0	0	xxxx	5	7	9	7.27	7.23	33+0	0	24	10.77	0.47	0	0	5	0	0	1	0	1	0	xxxx	0	0	xxxx	0	xxxx	15	1	1	0	0
347	1	1230	30.6	0	1	0	1	1	1	1	1	0	1	0	0	0	1	0	xxxx	9	9	-1	7.34	7.3	30+5	0	3	7.18	-1	1	0	0	0	0	1	0	2	0	xxxx	0	0	xxxx	0	xxxx	93	1	1	0	0
348	1	2495	33.6	0	1	0	2	0	0	0	0	0	0	0	0	0	0	0	xxxx	8	9	-1	7.24	7.22	33+5	0	4.5	15.51	-1	0	0	1	0	0	0	0	1	0	xxxx	0	0	xxxx	0	xxxx	14	1	1	0	0
349	0	1250	34	1	0	0	1	1	0	0	0	0	0	0	0	0	0	0	xxxx	9	9	-1	-1	-1	34+0	1	0	16.15	-1	0	0	0	0	0	0	2	0	0	xxxx	0	0	xxxx	0	xxxx	25	1	1	0	0
350	0	2190	34.6	0	0	0	1	2	0	0	1	0	1	1	1	0	1	0	xxxx	5	8	8	7.32	7.29	34+5	1	0	8.53	-1	0	0	0	0	0	0	0	2	0	xxxx	0	0	xxxx	0	xxxx	9	1	1	0	0
351	1	1745	33.6	0	0	1	1	1	1	0	0	0	0	0	0	0	0	0	xxxx	8	9	-1	-1	-1	33+4	1	0	7.78	0.17	0	0	0	0	0	0	0	2	0	xxxx	0	0	xxxx	0	xxxx	23	1	1	0	0
352	1	1710	33.6	0	0	1	1	1	1	0	0	0	0	0	0	0	0	0	xxxx	8	9	-1	-1	-1	33+4	1	0	7.78	0.17	0	0	0	0	0	0	0	2	0	xxxx	0	0	xxxx	0	xxxx	23	1	1	0	0
353	1	1765	33.6	0	0	1	1	1	1	0	0	0	0	0	0	0	0	0	xxxx	9	9	-1	-1	-1	33+4	1	0	7.78	0.17	0	0	0	0	0	0	0	2	0	xxxx	0	0	xxxx	0	xxxx	23	1	1	0	0
354	0	1490	31.4	0	0	1	1	1	1	0	0	0	0	0	0	0	0	0	xxxx	8	8	-1	7.39	7.36	31+3	1	0	9.81	-1	0	0	0	0	0	0	0	2	0	xxxx	0	0	xxxx	0	xxxx	39	1	1	0	0
355	0	1180	31.4	0	0	1	1	1	1	0	1	0	0	1	0	0	1	0	xxxx	6	9	-1	-1	-1	31+3	1	0	9.81	-1	0	0	0	0	0	0	0	2	0	xxxx	0	0	xxxx	0	xxxx	41	1	1	0	0
356	0	1405	31.4	0	0	1	1	1	1	0	0	0	0	0	0	0	0	0	xxxx	8	9	-1	-1	-1	31+3	1	0	9.81	-1	0	0	0	0	0	0	0	2	0	xxxx	0	0	xxxx	0	xxxx	41	1	1	0	0
357	1	1730	32.2	0	3	0	1	1	0	0	1	0	0	1	0	0	1	0	xxxx	6	8	-1	7.31	7.27	32+1	0	10	8.85	0.17	0	0	5	0	0	0	0	2	0	xxxx	0	0	xxxx	0	xxxx	23	1	1	0	0
358	0	1465	31.6	0	0	1	1	1	1	0	1	0	1	1	0	0	0	0	xxxx	6	8	-1	-1	-1	31+4	1	0	6.36	0.39	0	0	0	0	0	0	0	2	0	xxxx	0	0	xxxx	0	xxxx	42	1	1	0	0
359	0	1030	31.6	1	0	1	1	1	1	0	0	0	0	0	0	0	0	0	xxxx	9	10	10	7.32	7.23	31+4	1	0	6.36	0.39	0	0	0	0	0	0	0	2	0	xxxx	0	0	xxxx	0	xxxx	42	1	1	0	0
360	0	1800	34.3	0	0	1	1	1	1	0	1	0	1	0	0	0	0	0	xxxx	8	9	-1	-1	-1	34+2	1	0	5.68	1.15	0	0	0	0	0	0	0	2	0	xxxx	0	0	xxxx	0	xxxx	17	1	1	0	0
361	0	1490	34.3	1	0	1	1	1	1	0	0	0	0	0	0	0	0	0	xxxx	7	9	-1	7.34	7.35	34+2	1	0	5.68	1.15	0	0	0	0	0	0	0	2	0	xxxx	0	0	xxxx	0	xxxx	23	1	1	0	0
362	1	1530	34.3	1	0	1	1	1	1	0	0	0	0	0	0	0	0	0	xxxx	9	10	10	7.38	7.35	34+2	1	0	5.68	1.15	0	0	0	0	0	0	0	2	1	villite e perivillite cronica	0	0	xxxx	0	xxxx	23	1	1	0	0
363	1	1065	29.7	0	0	1	1	2	0	0	1	0	0	1	1	0	0	0	xxxx	5	7	9	7.32	7.31	29+5	1	0	18.77	3.07	0	0	0	0	1	0	0	2	0	xxxx	0	0	xxxx	0	xxxx	72	1	1	0	0
364	0	410	25	1	1	0	1	2	0	0	1	0	0	1	1	1	0	0	xxxx	2	8	9	7.31	7.36	25+0	1	0	12.56	0.05	0	0	0	0	1	0	2	2	0	xxxx	0	0	xxxx	1	prematurità estrema, iposviluppo	10	0	1	0	0
365	0	840	26.3	0	0	1	1	1	1	0	1	0	1	1	0	0	0	0	xxxx	3	8	8	7.38	7.34	26+1	0	30	12.77	0.35	0	0	4 + 5	0	0	0	0	2	1	xxxx	0	0	xxxx	0	xxxx	112	1	0	0	1
366	1	900	26.3	0	0	1	1	1	1	0	1	2	1	0	0	0	0	0	xxxx	6	8	-1	7.32	7.32	26+2	1	0	12.77	0.35	0	0	4 + 5	0	0	0	0	2	1	xxxx	0	0	xxxx	0	xxxx	112	1	1	0	1
367	0	1390	34.3	1	0	0	1	2	1	0	1	0	1	1	0	0	0	0	xxxx	7	8	-1	-1	-1	34+2	1	0	8.78	-1	0	0	0	0	0	0	0	2	0	xxxx	0	0	xxxx	0	xxxx	84	1	1	0	0
368	0	755	25.2	0	5	0	1	1	0	0	1	1	1	0	0	0	1	0	xxxx	8	9	-1	-1	-1	25+0	0	28	16.28	4.99	4	0	16	1	0	0	3	2	1	S2 G2	1	1	S1 G1	0	xxxx	118	1	1	0	1
369	1	2440	34	0	0	0	1	1	0	0	0	0	0	0	0	0	0	0	xxxx	9	10	10	-1	-1	34	1	0	10.05	-1	0	0	0	0	0	0	0	2	0	xxxx	0	0	xxxx	0	xxxx	6	1	0	0	0
370	1	2325	34	0	0	0	1	1	0	0	1	0	1	0	0	0	0	0	xxxx	7	8	-1	-1	-1	31	0	504	8.18	0.25	7	1	5 + 9 + 10	0	0	1	0	2	0	xxxx	0	0	xxxx	0	xxxx	8	1	0	0	0
371	0	1370	32.6	1	0	1	1	1	1	0	0	0	0	0	0	0	0	0	xxxx	9	10	10	-1	-1	32+5	1	0	7.46	1.05	0	0	0	0	0	0	0	2	0	xxxx	0	0	xxxx	0	xxxx	22	1	0	0	0
372	0	1720	32.6	0	0	1	1	1	1	1	1	0	0	1	0	0	0	0	xxxx	7	9	-1	-1	-1	32+5	0	2	7.46	1.05	0	0	0	0	0	0	0	2	0	xxxx	0	0	xxxx	0	xxxx	22	1	0	0	0
373	0	1910	33.6	0	0	1	1	1	1	0	0	0	0	0	0	0	0	0	xxxx	9	10	10	7.38	7.35	33+5	1	0	7.06	-1	0	0	0	0	0	0	0	2	0	xxxx	0	0	xxxx	0	xxxx	13	1	1	0	0
374	0	1930	33.6	0	0	1	1	1	1	0	0	0	0	0	0	0	0	0	xxxx	8	9	-1	7.36	7.34	33+5	1	0	7.06	-1	0	0	0	0	0	0	0	2	0	xxxx	0	0	xxxx	0	xxxx	13	1	1	0	0
375	1	2300	33.4	0	1	0	1	1	0	0	0	0	0	0	0	0	0	0	xxxx	8	9	-1	7.31	7.35	33+3	1	0	-1	-1	0	0	0	0	0	0	0	2	0	xxxx	0	0	xxxx	0	xxxx	8	1	1	0	0
376	1	1745	32.3	0	0	1	1	1	1	0	0	0	0	0	0	0	0	0	xxxx	9	10	10	-1	-1	32+2	0	2	18.59	1.14	1	1	17	0	0	0	0	2	0	xxxx	0	0	xxxx	0	xxxx	20	1	1	0	0
377	1	1945	32.3	0	0	1	1	1	1	0	1	1	0	0	0	0	0	0	xxxx	8	9	-1	-1	-1	32+2	0	2	18.59	1.14	1	1	17	0	0	0	0	2	0	xxxx	0	0	xxxx	0	xxxx	20	1	1	0	0
378	0	1750	34.3	0	0	0	1	1	1	0	0	0	0	0	0	0	0	0	xxxx	9	10	10	7.37	7.32	34+2	1	0	8.37	-1	0	0	0	0	1	0	0	2	0	xxxx	0	0	xxxx	0	xxxx	13	1	1	0	0
379	0	2170	34.3	0	0	0	1	1	1	0	0	0	0	0	0	0	0	0	xxxx	8	9	-1	-1	-1	34+2	1	0	8.37	-1	0	0	0	0	1	0	0	2	0	xxxx	0	0	xxxx	0	xxxx	13	1	1	0	0
380	0	980	27.6	0	0	0	0	0	0	0	0	0	0	0	0	0	0	0	xxxx	7	9	-1	7.28	-1	27+4	0	5	-1	-1	0	0	0	0	0	1	0	0	0	xxxx	0	0	xxxx	0	xxxx	67	1	1	0	0
381	1	2140	34.4	0	0	0	1	1	0	0	0	0	0	0	0	0	0	0	xxxx	8	9	-1	7.38	7.34	34+3	1	0	11.76	0.48	0	0	0	0	0	0	0	2	0	xxxx	0	0	xxxx	0	xxxx	6	1	1	0	0
382	1	2135	33	0	0	0	1	1	1	0	1	0	0	1	0	0	0	0	xxxx	7	8	-1	7.33	7.28	33+0	0	6	10.68	0.39	0	0	0	0	0	0	0	1	0	xxxx	0	0	xxxx	0	xxxx	14	1	1	0	0
383	1	1990	33	0	0	0	1	1	1	0	1	0	0	1	0	0	0	0	xxxx	7	9	-1	7.24	7.23	33+0	1	0	10.68	0.39	0	0	0	0	0	0	0	1	0	xxxx	0	0	xxxx	0	xxxx	14	1	1	0	0
384	1	1805	33.6	0	0	0	1	1	1	0	0	0	0	0	0	0	0	0	xxxx	9	10	10	-1	-1	32+4	0	167	10.77	0.22	1	1	4 + 5	0	0	0	0	2	1	S1 G2	0	1	S2 G2	0	xxxx	13	1	1	0	0
385	1	1945	33.6	0	0	0	1	1	1	0	0	0	0	0	0	0	0	0	xxxx	9	10	10	-1	-1	32+4	0	167	10.77	0.22	1	1	4 + 5	0	0	0	0	2	1	S1 G1	0	0	xxxx	0	xxxx	13	1	1	0	0
386	1	990	27	0	3	0	1	1	1	0	1	1	1	0	0	0	1	0	xxxx	7	8	-1	7.36	7.34	26+5	0	48	20.24	0.28	2 + 5	1	4 + 5	1	0	0	0	2	0	xxxx	1	0	xxxx	1	insuff. Respiratoria in idrocefalo post emorragico	59	0	1	0	0
387	1	980	27	0	3	0	1	1	1	0	1	1	1	0	0	0	1	0	xxxx	8	9	-1	7.38	7.34	26+5	0	48	20.24	0.28	2 + 5	1	4 + 5	1	0	0	0	2	0	xxxx	1	0	xxxx	0	xxxx	88	1	1	0	0
388	0	1990	34.6	0	0	0	1	1	0	0	0	0	0	0	0	0	0	0	xxxx	9	10	10	-1	-1	34+5	1	0	9.52	0.45	1	0	0	0	0	0	2	2	0	xxxx	0	0	xxxx	0	xxxx	11	1	1	0	0
389	0	2640	34	0	0	0	1	2	0	0	1	0	0	1	0	0	1	0	xxxx	5	7	8	7.33	7.28	34+0	1	0	14.15	0.58	15	0	0	0	0	0	0	2	0	xxxx	0	0	xxxx	0	xxxx	11	1	1	0	0
390	0	1935	34.3	0	0	1	1	1	1	0	0	0	0	0	0	0	0	0	xxxx	8	9	-1	-1	-1	34+2	1	0	-1	-1	1	1	0	0	0	0	0	2	0	xxxx	0	0	xxxx	0	xxxx	12	1	1	0	0
391	1	1925	34.3	0	0	1	1	1	1	0	0	0	0	0	0	0	0	0	xxxx	8	9	-1	-1	-1	34+2	1	0	-1	-1	1	1	0	0	0	0	0	2	0	xxxx	0	0	xxxx	0	xxxx	12	1	1	0	0
392	0	1800	33	0	0	0	0	0	0	0	0	0	0	0	0	0	0	0	xxxx	8	9	9	7.3	7.27	32+6	0	12	7.71	0.95	1	1	4 + 5	0	0	0	0	2	0	xxxx	0	0	xxxx	0	xxxx	13	1	1	0	0
393	0	1440	31.6	0	0	0	1	1	1	0	1	0	1	1	0	0	0	0	xxxx	6	9	-1	-1	7.3	31+4	0	12	9.5	1.21	0	0	0	0	0	0	0	2	0	xxxx	0	0	xxxx	0	xxxx	27	1	1	0	0
394	0	1350	31.6	0	0	0	1	1	1	0	1	0	1	1	0	0	0	0	xxxx	6	8	-1	-1	-1	31+4	0	12	9.5	1.21	0	0	0	0	0	0	0	2	0	xxxx	0	0	xxxx	0	xxxx	27	1	1	0	0
395	0	1200	31.6	0	0	0	1	1	1	0	1	0	1	1	0	0	1	0	xxxx	6	8	-1	7.32	7.3	31+4	0	12	9.5	1.21	0	0	0	0	0	0	0	2	0	xxxx	0	0	xxxx	0	xxxx	33	1	1	0	0
396	1	1075	27.6	0	0	1	1	1	1	0	1	0	0	1	0	0	1	0	xxxx	5	8	-1	7.37	7.3	27+5	0	2	11.11	7.66	15	0	0	1	0	0	0	2	0	xxxx	0	0	xxxx	0	xxxx	62	1	1	0	0
397	1	1100	27.6	0	0	1	1	1	1	0	1	0	0	1	1	0	2	0	xxxx	5	8	-1	7.22	7.14	27+5	0	2	11.11	7.66	15	0	0	1	0	0	0	2	0	xxxx	0	0	xxxx	0	xxxx	62	1	1	0	0
398	0	990	27.6	0	0	1	1	1	1	0	1	0	0	1	1	1	1	0	xxxx	4	8	-1	7.33	7.28	27+5	0	2	11.11	7.66	15	0	0	1	0	0	0	2	0	xxxx	0	0	xxxx	0	xxxx	62	1	1	0	1
399	1	2050	33.8	0	0	1	1	1	1	0	0	0	0	0	0	0	0	0	xxxx	9	10	10	-1	-1	33+5	0	12	10.76	-1	0	0	1	0	0	0	0	1	0	xxxx	0	0	xxxx	0	xxxx	16	1	1	0	0
400	1	2050	33.8	0	0	1	1	1	1	0	1	0	0	1	0	0	1	0	xxxx	6	8	-1	-1	-1	33+5	0	12	10.76	-1	0	0	1	0	0	0	0	1	0	xxxx	0	0	xxxx	0	xxxx	16	1	1	0	0
401	0	1425	36.3	1	0	1	0	0	0	0	1	0	1	1	0	0	0	0	xxxx	6	9	-1	-1	-1	36+1	0	12	-1	-1	0	0	0	0	0	0	0	0	0	xxxx	0	0	xxxx	0	xxxx	20	1	1	0	0
402	0	2130	34	0	0	0	1	1	1	0	0	0	0	0	0	0	0	0	xxxx	8	9	-1	7.37	-1	34+0	1	0	8.41	0.05	0	5	4	0	0	0	0	2	0	xxxx	0	0	xxxx	0	xxxx	14	1	1	0	0
403	0	1845	34	0	0	0	1	1	1	0	0	0	0	0	0	0	0	0	xxxx	8	9	-1	7.35	-1	34+0	1	0	8.41	0.05	0	5	4	0	0	0	0	2	0	xxxx	0	0	xxxx	0	xxxx	14	1	1	0	0
404	0	1830	34	0	0	0	1	1	1	0	1	0	1	0	0	0	0	0	xxxx	6	9	-1	7.36	7.33	34+0	1	0	8.41	0.05	0	5	4	0	0	0	0	2	1	villite e perivillite cronica	0	0	xxxx	0	xxxx	14	1	1	0	0
405	1	1480	31	0	0	0	0	0	0	0	1	0	1	0	0	0	0	0	xxxx	8	9	-1	7.29	7.26	31+0	0	12	14.36	1.03	0	0	0	0	0	0	0	1	1	subcorionite acuta	1	0	xxxx	0	xxxx	37	1	1	0	0
406	0	1415	34.3	1	0	1	1	1	1	0	0	0	0	0	0	0	0	0	xxxx	9	10	10	-1	-1	34+2	1	0	5.12	-1	0	0	0	0	0	0	0	2	0	xxxx	0	0	xxxx	0	xxxx	19	1	1	0	0
407	0	2030	34.3	0	0	1	1	1	1	0	0	0	0	0	0	0	0	0	xxxx	8	8	-1	-1	-1	34+2	1	0	5.12	-1	0	0	0	0	0	0	0	2	0	xxxx	0	0	xxxx	0	xxxx	15	1	1	0	0
408	1	1450	29.8	0	0	1	1	1	1	0	1	0	1	1	0	0	1	0	xxxx	8	8	-1	7.36	7.35	29+6	0	5	10.98	0.05	1	0	5	0	0	0	0	1	0	xxxx	0	0	xxxx	0	xxxx	49	1	1	0	0
409	0	1440	29.8	0	0	1	1	1	1	0	1	0	1	0	0	0	0	0	xxxx	8	9	-1	7.36	-1	29+6	0	5	10.98	0.05	1	0	5	0	0	0	0	1	0	xxxx	0	0	xxxx	0	xxxx	45	1	1	0	0
410	0	1220	31.6	0	0	1	1	1	1	0	1	0	0	1	1	0	1	1	xxxx	6	7	9	7.38	7.33	31+4	1	0	4.77	0.47	0	0	0	0	1	0	0	2	0	xxxx	0	0	xxxx	0	xxxx	42	1	1	0	0
411	0	1220	31.6	0	0	1	1	1	1	0	1	0	1	0	0	0	0	0	xxxx	8	10	10	-1	7.3	31+4	1	0	4.77	0.47	0	0	0	0	1	0	0	2	0	xxxx	0	0	xxxx	0	xxxx	42	1	1	0	0
412	1	1340	31.6	0	0	1	1	1	1	0	0	0	0	0	0	0	0	0	xxxx	9	10	10	7.33	7.29	31+4	1	0	4.77	0.47	0	0	0	0	1	0	0	2	0	xxxx	0	0	xxxx	0	xxxx	31	1	1	0	0
413	0	810	26	0	0	0	0	1	0	3	1	1	0	1	1	0	2	0	xxxx	4	7	-1	7.36	-1	24+0	0	288	10.86	1.76	1	1	4 + 5	0	0	1	0	2	1	corio aggiunta per funisite	0	1	S1 G1	1	perforazione intestinale	10	0	1	0	0
414	0	1765	34.6	1	0	0	1	1	1	0	0	0	0	0	0	0	0	0	xxxx	9	10	10	-1	-1	34+5	1	0	9.25	0.05	0	0	0	0	0	0	0	0	0	xxxx	0	0	xxxx	0	xxxx	20	1	1	0	0
415	1	1870	34.6	0	0	0	1	1	1	0	0	0	0	0	0	0	0	0	xxxx	9	10	10	-1	-1	34+5	1	0	9.25	0.05	0	0	0	0	0	0	0	0	0	xxxx	0	0	xxxx	0	xxxx	20	1	1	1	0
416	0	740	24.8	0	0	0	0	0	0	0	1	2	0	1	1	1	3	0	xxxx	1	6	-1	7.34	7.12	24+2	0	96	19.81	3.29	5	1	4 + 5 + 10	1	0	1	0	2	1	S3 G3	1	1	S2 G2	1	esaurimento cardiorespiratorio	233	0	1	0	1
417	0	2150	34.6	0	3	0	1	1	0	0	0	0	0	0	0	0	0	0	xxxx	8	9	-1	-1	-1	34+4	1	0	10.7	-1	0	0	0	0	0	0	0	2	0	xxxx	0	0	xxxx	0	xxxx	6	1	0	0	0
418	0	1440	29.7	0	0	1	0	0	0	0	1	0	0	1	1	1	2	0	xxxx	2	7	8	-1	-1	21+3	0	1344	24.71	0.52	1	0	4 + 5	0	0	0	2	2	1	S2 G2	1	1	S2 G2	0	xxxx	69	1	1	0	0
419	0	1370	28.7	0	0	0	1	2	0	0	1	0	1	1	0	0	1	0	xxxx	8	8	-1	-1	-1	28+5	1	0	11.36	0.17	0	0	0	0	0	1	0	0	1	xxxx	0	0	xxxx	0	xxxx	44	1	1	0	1
420	1	2670	35	0	0	1	0	0	0	0	0	0	0	0	0	0	0	0	xxxx	9	10	10	-1	-1	34+4	0	9	7.75	0.29	0	0	5	0	0	0	0	0	0	xxxx	0	0	xxxx	0	xxxx	10	1	0	0	0
421	1	1860	31.8	0	5	0	0	0	0	0	1	0	1	0	0	0	1	0	xxxx	7	8	9	7.25	7.15	31+6	1	6	10.23	1.81	0	0	0	0	0	0	0	1	0	xxxx	0	0	xxxx	0	xxxx	25	1	1	0	0
422	1	1970	34	0	0	0	1	1	1	0	0	0	0	0	0	0	0	0	xxxx	8	9	-1	-1	-1	34+0	1	0	-1	-1	1	0	0	0	0	0	0	2	0	xxxx	0	0	xxxx	0	xxxx	20	1	1	0	0
423	1	1835	34	0	0	0	1	1	1	0	0	0	0	0	0	0	0	0	xxxx	8	9	-1	-1	-1	34+0	1	0	-1	-1	1	0	0	0	0	0	0	2	0	xxxx	0	0	xxxx	0	xxxx	20	1	1	0	0
424	0	1750	34.3	1	0	0	0	0	0	0	0	0	0	0	0	0	0	0	xxxx	9	10	10	7.36	7.29	34+2	0	1	8.24	0.95	1	1	4 + 5	0	0	0	0	2	0	xxxx	0	0	xxxx	0	xxxx	30	1	1	0	0
425	1	2990	34.8	0	5	0	1	2	0	0	1	0	0	1	1	0	0	0	xxxx	5	8	-1	7.32	7.27	34+6	1	0	13.18	1.46	0	0	0	0	0	0	0	0	0	xxxx	0	0	xxxx	0	xxxx	6	1	0	0	0
426	0	580	28	1	0	0	1	1	0	0	1	1	1	0	0	0	0	0	xxxx	7	8	-1	7.33	7.28	28+0	1	0	11.67	0.89	0	0	0	0	0	0	0	2	0	xxxx	0	0	xxxx	0	xxxx	102	1	1	0	1
427	1	2195	33.2	0	1	0	0	1	0	0	0	0	0	0	0	0	0	0	xxxx	9	10	10	-1	-1	33+1	0	5	8.2	0.32	1	0	5	0	0	0	0	2	0	xxxx	0	0	xxxx	0	xxxx	11	1	1	0	0
428	1	1725	33	0	0	0	1	2	0	0	1	0	0	1	1	0	0	0	xxxx	6	7	-1	7.05	-1	33+0	0	12	-1	-1	0	0	0	0	0	0	0	0	0	xxxx	0	0	xxxx	0	xxxx	30	1	1	0	0
429	1	2140	34.2	0	0	0	1	1	1	0	0	0	0	0	0	0	0	0	xxxx	8	9	-1	-1	-1	34+1	1	0	-1	-1	1	1	0	0	0	0	2	2	0	xxxx	0	0	xxxx	0	xxxx	18	1	1	0	0
430	1	2140	34.2	0	0	0	1	1	1	0	0	0	0	0	0	0	0	0	xxxx	9	9	-1	-1	-1	34+1	1	0	-1	-1	1	1	0	0	0	0	2	2	0	xxxx	0	0	xxxx	0	xxxx	18	1	1	0	0
431	0	2410	33.6	0	0	0	1	1	1	0	0	0	0	0	0	0	0	0	xxxx	8	9	-1	-1	-1	33+5	1	0	13.12	-1	1	1	0	0	0	0	0	2	0	xxxx	0	0	xxxx	0	xxxx	9	1	0	0	0
432	1	1470	33.6	1	0	0	1	1	1	0	1	0	1	0	0	0	1	0	xxxx	8	9	-1	7.36	-1	33+5	1	0	13.12	-1	1	1	0	0	0	0	0	2	0	xxxx	0	0	xxxx	0	xxxx	23	1	1	0	0
433	1	2365	33.2	0	0	0	1	1	1	3	0	0	0	0	0	0	0	0	xxxx	9	10	10	-1	-1	33+1	1	0	7.83	0.27	0	0	0	0	0	0	0	2	0	xxxx	0	0	xxxx	0	xxxx	14	1	1	0	0
434	0	735	30	1	0	0	1	1	1	0	1	0	1	0	0	0	1	0	xxxx	8	9	-1	7.35	7.3	30+0	1	0	-1	-1	7	0	4 + 5	0	0	0	0	2	0	xxxx	0	0	xxxx	0	xxxx	76	1	1	0	0
435	1	2435	34	0	0	0	1	1	1	0	0	0	0	0	0	0	0	0	xxxx	8	9	-1	-1	-1	34+0	1	0	-1	-1	0	0	0	0	0	0	0	0	0	xxxx	0	0	xxxx	0	xxxx	8	1	0	0	0
436	0	1790	34	1	0	0	1	1	1	0	0	0	0	0	0	0	0	0	xxxx	9	10	-1	-1	-1	34+0	1	0	-1	-1	0	0	0	0	0	0	0	0	0	xxxx	0	0	xxxx	0	xxxx	14	1	0	0	0
437	0	2290	34	0	0	0	1	1	1	0	0	0	0	0	0	0	0	0	xxxx	8	9	-1	-1	-1	34+0	1	0	-1	-1	0	0	0	0	0	0	0	0	0	xxxx	0	0	xxxx	0	xxxx	8	1	0	0	0
438	1	2230	34.3	0	0	0	1	1	0	0	0	0	0	0	0	0	0	0	xxxx	9	10	10	-1	-1	34+2	1	0	8.27	-1	0	0	0	0	1	0	0	2	0	xxxx	0	0	xxxx	0	xxxx	10	1	0	0	0
439	1	1980	34.2	0	0	0	0	0	0	0	0	0	0	0	0	0	0	0	xxxx	9	10	10	-1	-1	34+0	0	30	8.44	0.32	1	1	5	0	0	0	0	0	1	S1 G1	0	0	xxxx	0	xxxx	12	1	1	0	0
440	1	1320	28.4	0	1	0	1	1	0	0	1	0	1	1	0	0	1	0	xxxx	6	7	-1	7.36	7.28	28+3	0	240	16.48	3.92	7	1	4 + 5 + 14	0	0	0	1	2	1	S2 G2	1	1	S2 G2	0	xxxx	64	1	1	0	0
441	0	1490	32	0	1	0	1	1	1	0	1	0	1	1	0	0	1	0	xxxx	7	8	-1	7.38	7.32	32+0	1	0	-1	-1	0	0	0	0	0	0	0	2	0	xxxx	0	0	xxxx	0	xxxx	34	1	1	0	0
442	0	1480	32	0	1	0	1	1	1	0	1	0	1	0	0	0	1	0	xxxx	7	8	-1	7.36	7.31	32+0	1	0	-1	-1	0	0	0	0	0	0	0	2	0	xxxx	0	0	xxxx	0	xxxx	34	1	1	0	0
443	0	2230	34.4	0	0	0	0	1	0	0	0	0	0	0	0	0	0	0	xxxx	9	10	10	-1	-1	34+3	0	18	-1	-1	1	3	4 + 5	0	0	0	0	0	0	xxxx	0	0	xxxx	0	xxxx	8	1	0	0	0
444	1	1160	27.2	0	0	0	1	2	1	0	1	0	0	1	1	0	1	0	xxxx	1	7	8	-1	7.33	27+1	0	10	9.81	0.75	0	0	0	0	0	0	2	2	1	S1G1	0	1	S1G1	1	scompenso in TTTS	1	0	1	0	-1
445	1	710	27.2	0	0	0	1	2	1	0	1	1	0	1	1	0	2	1	adrenalina et 0,1 ml	5	8	8	-1	-1	27+1	0	10	9.81	0.75	0	0	0	0	0	0	2	2	1	S1G1	0	1	S1G1	0	xxxx	141	1	1	0	0
446	1	840	25	0	2	0	0	0	0	0	1	0	0	1	1	0	2	0	xxxx	5	7	8	7.38	7.35	25+0	0	1	11.58	5.55	5	1	4 + 5	0	0	1	0	1	0	xxxx	0	0	xxxx	0	xxxx	154	1	1	0	1
447	0	1250	27.4	0	0	1	1	1	0	0	1	0	0	1	1	0	2	0	SF	1	7	-1	6.91	6.97	27+3	1	0	10.18	3.04	2	0	4 + 5 + 9	0	0	0	0	2	1	S3 G2	0	1	S1G1	0	xxxx	75	1	7	0	0
448	1	1880	33.2	0	0	0	1	1	1	1	0	0	0	0	0	0	0	0	xxxx	9	10	10	7.4	7.36	31+4	0	288	10.32	0.53	1	1	4 + 5	0	0	1	2	2	1	np	0	1	np	0	xxxx	34	1	1	0	0
449	1	2020	33	0	0	0	0	1	0	0	0	0	0	0	0	0	0	0	xxxx	8	9	-1	-1	-1	32+6	0	24	12.04	0.15	2 + 15	2	5	0	0	0	0	2	0	xxxx	0	0	xxxx	0	xxxx	17	1	1	0	0
450	0	1350	31.3	0	0	0	1	1	0	0	0	0	0	0	0	0	0	0	xxxx	8	9	-1	-1	-1	31+2	1	0	9.31	0.05	7	1	0	0	1	0	0	2	0	xxxx	0	0	xxxx	0	xxxx	30	1	1	0	0
451	1	1710	31	0	2	0	1	1	0	0	1	0	0	1	0	0	0	0	xxxx	8	10	10	7.34	7.24	31+0	0	22	12.59	3.82	0	0	0	1	0	0	0	1	1	S3G1	1	1	S1G1	0	xxxx	54	1	1	0	0
452	1	2180	34	0	0	0	1	1	0	0	0	0	0	0	0	0	0	0	xxxx	8	8	-1	7.38	7.28	33+1	0	120	10.76	0.05	3	1	4 + 5	0	0	0	0	2	1	S1G1	0	0	xxxx	0	xxxx	9	1	1	0	0
453	1	670	23.8	0	1	0	1	1	0	0	1	0	0	1	1	0	1	0	xxxx	4	8	-1	7.4	7.29	23+3	0	72	17	3.05	5 + 9	8	4 + 5 + 10	1	0	1	0	2	0	xxxx	1	0	xxxx	0	xxxx	166	1	1	0	1
454	0	2100	32.8	0	1	0	1	2	0	0	1	0	1	0	0	0	2	0	xxxx	5	7	8	7.22	7.19	32+6	1	0	13.17	11.21	0	0	4 + 5	0	0	0	0	2	0	xxxx	1	0	xxxx	0	xxxx	28	1	1	0	0
455	0	1955	34	0	0	0	1	1	0	0	0	0	0	0	0	0	0	0	xxxx	8	9	-1	7.37	-1	34+4	1	0	9.93	0.2	0	0	0	0	0	0	2	2	0	xxxx	0	0	xxxx	0	xxxx	8	1	1	0	0
456	0	1920	34.3	0	0	0	1	1	0	0	1	0	0	1	0	0	0	0	xxxx	6	7	9	7.35	7.33	34+2	1	0	5.91	1.21	0	0	4	1	0	0	0	0	0	xxxx	1	0	xxxx	0	xxxx	13	1	1	0	0
457	1	900	29.4	1	0	0	1	1	0	0	1	0	1	1	0	0	0	0	xxxx	8	9	-1	7.31	-1	29+3	1	0	10.6	3.12	0	0	0	0	1	0	0	2	0	xxxx	0	0	xxxx	0	xxxx	55	1	1	0	0
458	1	1750	34.4	1	0	0	1	1	0	0	0	0	0	0	0	0	0	0	xxxx	9	10	10	-1	-1	34+3	1	0	9.93	0.44	0	0	0	0	0	0	2	2	0	xxxx	0	0	xxxx	0	xxxx	12	1	1	0	0
459	0	1645	34.8	1	0	0	1	1	1	0	0	0	0	0	0	0	0	0	xxxx	9	10	10	-1	-1	34+5	1	0	9.4	0.05	5	1	4 + 5	0	0	0	0	2	0	xxxx	0	0	xxxx	0	xxxx	23	1	1	0	0
460	0	1980	34.8	0	0	0	1	1	1	0	0	0	0	0	0	0	0	0	xxxx	8	9	-1	-1	-1	34+5	1	0	9.4	0.05	5	1	4 + 5	0	0	0	0	2	0	xxxx	0	0	xxxx	0	xxxx	23	1	1	0	0
461	0	1420	33	1	0	0	1	1	0	0	1	0	1	0	0	0	0	0	xxxx	8	9	-1	7.36	-1	33+2	1	0	11.85	0.05	0	0	0	0	0	0	0	2	0	xxxx	0	0	xxxx	0	xxxx	35	1	1	0	0
462	1	940	28	0	0	0	1	1	0	0	1	1	0	1	0	0	1	0	xxxx	7	8	-1	7.26	7.19	28+1	1	0	9.09	0.05	0	0	0	0	1	0	0	2	0	xxxx	0	0	xxxx	0	xxxx	174	1	1	0	1
463	1	1880	29	0	0	0	1	1	0	0	1	0	0	0	1	0	3	0	xxxx	6	8	-1	7.36	-1	29+0	1	0	9.63	0.13	15	1	0	0	0	0	3	2	0	xxxx	0	0	xxxx	0	xxxx	157	1	1	0	1
464	1	750	29.4	1	0	0	1	1	1	0	1	0	0	1	1	0	1	0	xxxx	4	8	-1	7.31	7.23	29+3	1	0	11.12	0.64	0	0	0	0	0	0	0	2	0	xxxx	0	0	xxxx	0	xxxx	128	1	1	0	0
465	1	835	29.4	1	0	0	1	1	1	0	1	0	1	1	0	0	1	0	xxxx	6	8	-1	7.32	7.25	29+3	1	0	11.12	0.64	0	0	0	0	0	0	0	2	0	xxxx	0	0	xxxx	0	xxxx	88	1	1	0	1
466	1	2585	34	0	0	0	1	1	0	0	0	0	0	0	0	0	0	0	xxxx	8	10	10	7.35	7.32	31+5	0	384	12.57	0.54	15	7	2 + 8	0	0	0	0	2	0	xxxx	0	0	xxxx	0	xxxx	17	1	1	0	0
467	1	670	29.7	1	0	0	1	1	0	0	1	1	1	1	0	0	1	0	xxxx	7	8	-1	-1	-1	29+5	1	0	9.96	-1	0	0	0	0	0	0	0	2	0	xxxx	0	0	xxxx	0	xxxx	233	1	0	0	1
468	0	1760	34.6	0	4	0	1	1	0	0	0	0	0	0	0	0	0	0	xxxx	8	9	-1	-1	-1	34+6	1	0	13.31	0.23	1	1	0	0	1	0	0	2	0	xxxx	0	0	xxxx	0	xxxx	18	1	1	0	0
469	1	1315	28	0	1	0	0	1	1	0	1	0	1	1	0	0	0	0	xxxx	6	9	-1	7.23	7.13	28+0	1	0	14.36	-1	0	0	0	0	0	0	0	0	0	xxxx	0	0	xxxx	0	xxxx	54	1	1	0	0
470	1	1290	28	0	1	0	0	1	1	0	1	1	1	1	0	0	0	0	xxxx	7	8	-1	7.3	7.24	28+0	1	0	14.36	-1	0	0	0	0	0	0	0	0	1	S3 G2	0	1	S1 G1	0	xxxx	54	1	1	0	0
471	1	2710	34	0	0	0	0	1	0	0	0	0	0	0	0	0	0	0	xxxx	9	10	10	-1	-1	34+0	0	8	9.64	0.8	0	0	0	0	0	0	0	0	0	xxxx	0	0	xxxx	0	xxxx	5	1	1	0	0
472	1	1850	33.8	0	0	0	1	1	1	0	0	0	0	0	0	0	0	0	xxxx	9	9	-1	-1	-1	33+6	1	0	9.86	0.49	1	1	4 + 5	0	0	0	0	2	0	xxxx	0	0	xxxx	0	xxxx	23	1	1	0	0
473	1	1585	33.8	1	0	0	1	1	1	0	1	0	0	1	0	0	0	0	xxxx	7	9	-1	7.36	7.32	32+2	0	336	9.86	0.49	1	1	4 + 5	0	0	0	2	2	0	xxxx	0	0	xxxx	0	xxxx	23	1	1	0	0
474	1	1925	30	0	0	0	1	1	0	0	1	0	1	1	0	0	1	0	xxxx	7	8	-1	7.36	-1	30+0	0	10	7.74	0.05	1	1	4	0	0	0	0	1	0	xxxx	0	0	xxxx	0	xxxx	37	1	1	0	0
475	1	890	28	0	0	0	1	1	1	0	1	0	1	0	0	0	0	0	xxxx	7	8	-1	7.39	7.32	28+0	1	0	14.11	0.35	1	1	4 + 5	0	0	0	0	2	0	xxxx	0	0	xxxx	0	xxxx	87	1	1	0	0
476	1	1120	28	0	0	0	1	1	1	0	1	1	1	0	0	0	0	0	xxxx	7	8	-1	7.43	7.35	28+0	1	0	14.11	0.35	1	1	4 + 5	0	0	0	0	2	0	xxxx	0	0	xxxx	0	xxxx	71	1	1	0	0
477	1	1670	31	0	0	0	1	1	0	0	1	0	1	1	0	0	1	0	xxxx	5	9	-1	7.36	7.31	18+0	0	2268	10.13	0.05	1	7	0	0	0	0	0	2	1	flogosi cronica	0	0	xxxx	0	xxxx	37	1	1	0	0
478	0	1650	34.3	1	3	0	1	1	1	0	0	0	0	0	0	0	0	0	xxxx	8	9	-1	-1	-1	34+0	1	0	9.5	-1	0	0	0	0	0	0	0	2	0	xxxx	0	0	xxxx	0	xxxx	19	1	1	0	0
479	0	2065	34.3	0	3	0	1	1	1	0	0	0	0	0	0	0	0	0	xxxx	7	8	-1	-1	-1	34+0	1	0	9.5	-1	0	0	0	0	0	0	0	2	0	xxxx	0	0	xxxx	0	xxxx	19	1	1	0	0
480	0	2025	34	0	0	0	1	1	1	0	0	0	0	0	0	0	0	0	xxxx	8	10	10	-1	-1	34+0	1	0	9.13	-1	1	1	0	0	0	0	3	0	0	xxxx	0	0	xxxx	0	xxxx	7	1	1	0	0
481	0	2255	34	0	0	0	1	1	1	0	0	0	0	0	0	0	0	0	xxxx	8	9	-1	-1	-1	34+0	1	0	9.13	-1	1	1	0	0	0	0	3	0	0	xxxx	0	0	xxxx	0	xxxx	7	1	1	0	0
482	1	2330	34	0	0	0	1	1	1	0	0	0	0	0	0	0	0	0	xxxx	9	10	10	-1	-1	34+0	1	0	5.27	-1	1	0	0	0	0	0	0	0	0	xxxx	0	0	xxxx	0	xxxx	5	1	1	0	0
483	1	1860	34	0	0	0	1	1	1	0	0	0	0	0	0	0	0	0	xxxx	9	10	10	-1	-1	34+0	1	0	5.27	-1	1	0	0	0	0	0	0	0	0	xxxx	0	0	xxxx	0	xxxx	5	1	1	0	0
484	0	1795	34.6	0	0	0	1	1	1	0	0	0	0	0	0	0	0	0	xxxx	9	10	10	-1	-1	34+4	1	0	9.27	1.53	0	0	0	0	1	0	0	2	0	xxxx	0	0	xxxx	0	xxxx	13	1	1	0	0
485	0	1850	34.6	0	0	0	1	1	1	0	0	0	0	0	0	0	0	0	xxxx	8	9	-1	-1	-1	34+4	1	0	9.27	1.53	0	0	0	0	1	0	0	2	0	xxxx	0	0	xxxx	0	xxxx	13	1	1	0	0
486	0	1865	32.4	0	0	0	1	1	0	0	1	0	1	1	0	0	0	0	xxxx	4	7	-1	6.93	6.91	32+3	0	11	12.64	0.87	1	1	4 + 5	0	0	0	0	0	0	xxxx	0	0	xxxx	0	xxxx	24	1	1	0	0
487	1	2015	33.6	0	0	1	1	1	1	0	0	0	0	0	0	0	0	0	xxxx	9	10	10	-1	-1	33+2	0	60	15.9	6.12	1	0	4 + 5	1	0	0	0	2	0	xxxx	1	0	xxxx	0	xxxx	19	1	1	0	0
488	1	1780	33.6	0	0	1	1	1	1	0	0	0	0	0	0	0	0	0	xxxx	9	10	10	-1	-1	33+2	0	60	15.9	6.12	1	0	4 + 5	1	0	0	0	2	1	S3 G2	1	1	S2 G1	0	xxxx	19	1	1	0	0
489	1	2040	32.3	0	0	0	1	1	1	0	0	0	0	0	0	0	0	0	xxxx	9	10	10	-1	-1	32+2	0	6	6.72	1.19	0	0	5	0	0	0	0	1	0	xxxx	0	0	xxxx	0	xxxx	27	1	1	0	0
490	0	2030	32.3	0	0	0	1	1	1	0	1	0	1	1	0	0	1	0	xxxx	5	7	-1	7.34	7.32	32+2	1	0	6.72	1.19	0	0	5	0	0	0	0	1	0	xxxx	0	0	xxxx	0	xxxx	35	1	1	0	0
491	1	1370	31	0	0	1	1	1	1	0	1	0	1	0	0	0	0	0	xxxx	8	9	-1	7.35	7.28	30+6	0	24	16.25	0.2	5 + 15	1	4	1	0	0	0	2	1	S1 G1	1	0	xxxx	0	xxxx	36	1	1	0	0
492	1	1490	31	0	0	1	1	1	1	0	1	0	1	1	0	0	1	0	xxxx	5	8	-1	-1	-1	30+6	0	24	16.25	0.2	5 + 15	1	4	1	0	0	0	2	0	xxxx	1	0	xxxx	0	xxxx	28	1	1	0	0
493	1	1745	34.6	1	0	0	1	1	0	0	1	0	0	1	0	0	0	0	xxxx	6	8	-1	7.28	-1	34+4	1	0	11.36	-1	0	0	0	0	1	0	0	1	0	xxxx	0	0	xxxx	0	xxxx	18	1	1	0	0
494	1	1990	32.7	0	0	0	1	1	0	0	0	0	0	0	0	0	0	0	xxxx	7	8	-1	7.36	7.32	32+5	0	9	11.09	-1	0	0	0	0	0	0	0	2	0	xxxx	0	0	xxxx	0	xxxx	14	1	1	0	0
495	0	1490	31	0	0	1	1	1	1	0	1	0	1	0	0	0	0	0	xxxx	8	9	-1	7.39	7.37	31+6	1	0	11.89	0.36	5	1	4	0	0	0	0	2	1	S2 G1	0	1	S1 G1	0	xxxx	52	1	1	0	0
496	1	1450	31	0	0	1	1	1	1	0	1	0	1	0	0	0	0	0	xxxx	8	9	-1	7.4	-1	31+6	1	0	11.89	0.36	5	1	4	0	0	0	0	2	1	S1 G1	0	0	xxxx	0	xxxx	101	1	1	0	1
497	1	1845	33.6	0	0	0	0	1	0	0	0	0	0	0	0	0	0	0	xxxx	9	10	10	-1	-1	33+4	0	0.5	10.24	0.44	2 + 15	1	0	0	0	0	0	2	0	xxxx	0	0	xxxx	0	xxxx	17	1	8	0	0
498	1	1460	33.6	1	0	0	1	1	1	0	0	0	0	0	0	0	0	0	xxxx	9	10	10	-1	-1	33+4	1	0	10.15	-1	0	0	0	0	0	0	1	0	0	xxxx	0	0	xxxx	0	xxxx	17	1	1	0	0
499	1	1850	33.6	0	0	0	1	1	1	0	1	0	1	1	0	0	1	0	xxxx	5	8	-1	7.27	7.22	33+4	1	0	10.15	-1	0	0	0	0	0	0	3	0	0	xxxx	0	0	xxxx	0	xxxx	17	1	1	0	0
500	1	2365	34.6	0	0	0	1	1	1	0	0	0	0	0	0	0	0	0	xxxx	8	9	-1	-1	-1	34+4	1	0	9.73	-1	1	1	0	0	0	0	0	0	0	xxxx	0	0	xxxx	0	xxxx	8	1	0	0	0
501	0	2250	34.6	0	0	0	1	1	1	0	0	0	0	0	0	0	0	0	xxxx	8	9	-1	-1	-1	34+4	1	0	9.73	-1	1	1	0	0	0	0	0	0	0	xxxx	0	0	xxxx	0	xxxx	8	1	0	0	0
502	0	1275	32.2	1	0	0	1	1	0	0	1	0	0	1	0	0	1	0	xxxx	5	8	-1	-1	-1	32+1	1	0	13.55	0.19	2	1	5	0	1	0	0	2	0	xxxx	0	0	xxxx	0	xxxx	57	1	1	0	0
503	0	1740	31.4	0	0	1	1	1	0	1	1	0	1	0	0	0	0	0	xxxx	7	9	-1	-1	-1	30+4	0	144	12	0.6	1	1	4 + 5	0	0	0	0	2	0	xxxx	0	0	xxxx	0	xxxx	26	1	1	0	0
504	0	1750	34.3	0	0	0	1	1	1	0	0	0	0	0	0	0	0	0	xxxx	8	8	-1	-1	-1	34+2	1	0	5.2	-1	5	1	0	0	0	0	0	2	0	xxxx	0	0	xxxx	0	xxxx	16	1	1	0	0
505	1	1935	34.3	0	0	0	1	1	1	0	0	0	0	0	0	0	0	0	xxxx	8	9	-1	-1	-1	34+2	1	0	5.2	-1	5	1	0	0	0	0	0	2	0	xxxx	0	0	xxxx	0	xxxx	14	1	1	0	0
506	0	2045	34	0	0	1	1	1	1	0	0	0	0	0	0	0	0	0	xxxx	9	9	-1	-1	-1	34+0	0	6	11.02	-1	0	0	0	0	0	0	0	0	0	xxxx	0	0	xxxx	0	xxxx	8	1	1	0	0
507	1	2230	34	0	0	1	1	1	1	0	0	0	0	0	0	0	0	0	xxxx	8	9	-1	-1	-1	34+0	0	6	11.02	-1	0	0	0	0	0	0	0	0	0	xxxx	0	0	xxxx	0	xxxx	8	1	1	0	0
508	1	1855	32.8	0	0	1	1	1	1	0	0	0	0	0	0	0	0	0	xxxx	9	10	10	7.32	-1	32+6	1	0	6.47	0.41	0	0	0	0	1	0	0	2	0	xxxx	0	0	xxxx	0	xxxx	22	1	1	0	0
509	1	2250	32.8	0	0	1	1	1	1	0	0	0	0	0	0	0	0	0	xxxx	9	9	-1	-1	-1	32+6	1	0	6.47	0.41	0	0	0	0	1	0	0	2	0	xxxx	0	0	xxxx	0	xxxx	17	1	1	0	0
510	0	1625	34.7	1	0	1	1	1	1	0	1	0	1	0	0	0	0	0	xxxx	9	10	10	-1	-1	34+4	1	0	9.8	0.96	0	0	0	0	0	0	0	2	0	xxxx	0	0	xxxx	0	xxxx	22	1	1	0	0
511	1	2070	34.7	0	0	1	1	1	1	0	0	0	0	0	0	0	0	0	xxxx	8	9	-1	-1	-1	34+4	1	0	9.8	0.96	0	0	0	0	0	0	0	2	0	xxxx	0	0	xxxx	0	xxxx	7	1	1	0	0
512	0	1130	29.4	0	0	1	1	1	1	0	1	1	1	0	0	0	0	0	xxxx	6	9	-1	7.37	7.32	29+3	1	0	20.87	10.07	0	0	0	0	0	0	0	2	0	xxxx	0	0	xxxx	0	xxxx	53	1	1	0	0
513	0	1325	29.4	0	0	1	1	1	1	1	1	1	1	1	0	0	1	0	xxxx	7	8	-1	7.32	7.26	29+3	1	0	20.87	10.07	0	0	0	0	0	0	0	2	0	xxxx	0	0	xxxx	0	xxxx	37	1	1	0	0
514	0	960	29.4	0	0	1	1	1	1	0	1	0	1	1	1	0	1	0	SF e sangue 0 neg	2	8	9	7.27	7.18	29+3	1	0	20.87	10.07	0	0	0	0	0	0	0	2	0	xxxx	0	0	xxxx	0	xxxx	53	1	1	0	0
515	0	570	23	0	1	0	0	0	0	0	1	0	0	1	1	1	2	0	xxxx	1	5	-1	7.27	7.07	26+6	0	2	11.61	1.58	1	1	2 + 4 + 5	0	0	0	1	1	1	S3 G2	1	1	S2 G1	1	prematurità estrema	6	0	1	0	0
516	1	2370	31.8	0	0	0	1	1	1	0	0	0	0	0	0	0	0	0	xxxx	8	9	-1	-1	-1	31+6	1	0	7.38	1.39	0	0	0	0	0	0	0	2	0	xxxx	0	0	xxxx	0	xxxx	23	1	1	0	0
517	1	1675	31.8	0	0	0	1	1	1	0	0	0	0	0	0	0	0	0	xxxx	8	9	-1	-1	-1	31+6	1	0	7.38	1.39	0	0	0	0	0	0	0	2	0	xxxx	0	0	xxxx	0	xxxx	36	1	1	0	0
518	0	700	24.7	0	1	0	0	1	0	0	1	0	0	0	1	0	0	0	xxxx	5	8	-1	7.29	7.24	24+5	0	4	15.82	0.83	1	0	0	1	0	1	0	1	0	xxxx	1	0	xxxx	1	CID, IVH	5	0	1	0	1
519	0	2190	33	0	0	0	1	1	1	0	0	0	0	0	0	0	0	0	xxxx	9	10	10	-1	-1	33+0	0	1	11.69	-1	0	0	0	0	0	0	0	2	0	xxxx	0	0	xxxx	0	xxxx	21	1	1	0	0
520	0	1700	33	0	0	0	1	1	1	0	0	0	0	0	0	0	0	0	xxxx	9	10	10	-1	-1	33+0	0	1	11.69	-1	0	0	0	0	0	0	0	2	0	xxxx	0	0	xxxx	0	xxxx	21	1	1	0	0
521	1	2300	32.3	0	1	0	0	1	0	0	0	0	0	0	0	0	0	0	xxxx	9	10	10	-1	-1	30+1	0	360	12.26	1.29	1	1	4 + 18	0	0	0	0	2	0	xxxx	1	0	xxxx	0	xxxx	22	1	1	0	0
522	0	1365	29	0	0	1	1	1	1	0	1	1	1	1	0	0	0	0	xxxx	5	9	-1	7.36	-1	29+6	1	0	8.13	0.2	7 + 9	1	2 + 4	0	0	0	0	2	0	xxxx	0	0	xxxx	0	xxxx	60	1	1	0	0
523	0	1240	29	0	0	1	1	1	1	0	1	0	1	1	0	0	1	0	xxxx	5	8	-1	-1	-1	29+6	0	3	8.13	0.2	7 + 9	1	2 + 4	0	0	0	0	2	0	xxxx	0	0	xxxx	0	xxxx	60	1	1	0	0
524	1	2100	34	0	0	0	1	1	0	0	0	0	0	0	0	0	0	0	xxxx	8	10	10	-1	-1	33+3	0	96	14.88	0.5	0	0	4 + 5	0	0	0	0	2	0	xxxx	0	0	xxxx	0	xxxx	14	1	1	0	0
525	0	2150	34.8	0	0	0	1	1	0	0	0	0	0	0	0	0	0	0	xxxx	8	9	-1	-1	-1	34+6	1	0	11.8	-1	1	1	0	0	0	0	0	2	0	xxxx	0	0	xxxx	0	xxxx	16	1	1	0	0
526	0	1320	32.3	0	0	1	1	1	1	0	0	0	0	0	0	0	0	0	xxxx	8	9	-1	-1	-1	32+2	0	3	12.84	-1	15	0	0	0	0	0	0	0	0	xxxx	0	0	xxxx	0	xxxx	28	1	1	0	0
527	1	1780	32.3	0	0	1	1	1	1	0	0	0	0	0	0	0	0	0	xxxx	8	9	-1	-1	-1	32+2	0	3	12.84	-1	15	0	0	0	0	0	0	0	0	xxxx	0	0	xxxx	0	xxxx	18	1	1	0	0
528	1	2005	34.3	0	0	0	1	1	0	0	0	0	0	0	0	0	0	0	xxxx	9	10	10	-1	-1	34+2	1	0	6.67	0.05	0	0	0	0	0	0	2	2	0	xxxx	0	0	xxxx	0	xxxx	12	1	1	0	0
529	1	2120	32.7	0	5	0	1	1	0	0	0	0	0	0	0	0	0	0	xxxx	8	8	-1	7.25	7.23	32+5	1	0	11.6	0.05	0	0	5	0	0	1	0	2	0	xxxx	0	0	xxxx	0	xxxx	29	1	1	0	0
530	0	2225	34	0	0	0	1	1	1	0	0	0	0	0	0	0	0	0	xxxx	8	9	-1	-1	-1	34+0	1	0	11.23	-1	0	0	0	0	0	0	2	0	0	xxxx	0	0	xxxx	0	xxxx	16	1	1	0	0
531	0	1710	34	1	0	0	1	1	1	0	0	0	0	0	0	0	0	0	xxxx	8	9	-1	-1	-1	34+0	1	0	11.23	-1	0	0	0	0	0	0	0	0	0	xxxx	0	0	xxxx	0	xxxx	16	1	1	0	0
532	0	2370	34.6	0	0	0	0	1	0	0	0	0	0	0	0	0	0	0	xxxx	9	10	-1	-1	-1	34+4	0	28	8.64	0.05	0	0	5	0	0	1	0	0	0	xxxx	0	0	xxxx	0	xxxx	9	1	1	0	0
533	1	1090	31.3	1	0	0	1	1	0	0	1	0	0	1	1	0	1	0	xxxx	5	8	-1	7.33	7.26	31+2	1	0	12.92	0.05	1	0	0	0	0	0	0	2	0	xxxx	0	0	xxxx	0	xxxx	45	1	1	0	0
534	0	1850	32.4	0	0	0	0	1	0	0	1	0	1	1	0	0	1	0	xxxx	5	9	9	-1	-1	32+3	0	2	12.73	5.38	0	0	5	1	0	1	0	2	1	S3 G2	1	1	S2 G2	0	xxxx	23	1	1	0	0
535	1	2585	34	0	0	0	1	1	1	0	0	0	0	0	0	0	0	0	xxxx	8	9	-1	7.37	7.33	34+0	1	0	10.09	-1	0	0	0	0	0	0	0	2	0	xxxx	0	0	xxxx	0	xxxx	23	1	1	0	0
536	1	1670	34	1	0	0	1	1	1	0	0	0	0	0	0	0	0	0	xxxx	9	10	-1	-1	-1	34+0	1	0	10.09	-1	0	0	0	0	0	0	0	2	0	xxxx	0	0	xxxx	0	xxxx	23	1	1	0	0
537	1	1300	35	1	0	1	1	1	1	0	0	0	0	0	0	0	0	0	xxxx	8	9	-1	-1	-1	35+1	1	0	7.21	0.23	0	1	0	0	0	0	0	2	0	xxxx	0	0	xxxx	0	xxxx	29	1	1	0	0
538	0	2330	34.7	0	0	0	1	1	1	3	1	0	0	0	1	0	0	0	xxxx	6	9	-1	7.31	7.22	34+5	1	0	7.49	0.44	0	0	0	0	0	0	2	2	0	xxxx	0	0	xxxx	0	xxxx	7	1	1	0	0
539	1	2340	34	0	0	0	1	1	1	0	0	0	0	0	0	0	0	0	xxxx	8	10	10	-1	-1	34+0	1	0	7.5	0.13	0	0	0	0	0	0	0	0	0	xxxx	0	0	xxxx	0	xxxx	9	1	1	0	0
540	1	2055	34	0	0	0	1	1	1	0	0	0	0	0	0	0	0	0	xxxx	8	10	10	-1	-1	34+0	1	0	7.5	0.13	0	0	0	0	0	0	0	0	0	xxxx	0	0	xxxx	0	xxxx	9	1	1	0	0
541	1	1625	31	0	0	0	1	2	1	0	1	0	0	1	0	0	0	0	xxxx	6	8	-1	-1	-1	30+3	0	77	8.25	0.44	15	1	4 + 5	0	0	1	2	2	0	xxxx	0	0	xxxx	0	xxxx	41	1	1	0	0
542	1	1650	31	0	0	0	1	2	1	0	1	0	0	1	0	0	2	0	xxxx	5	8	-1	-1	-1	30+3	1	0	8.25	0.44	15	1	4 + 5	0	0	1	0	2	0	xxxx	0	0	xxxx	0	xxxx	41	1	1	0	0
543	1	2490	34.6	0	0	0	0	1	0	0	0	0	0	0	0	0	0	0	xxxx	8	9	-1	-1	-1	34+4	0	11	16.74	3.09	0	0	4 + 5	0	0	0	0	0	0	xxxx	1	0	xxxx	0	xxxx	7	1	1	0	0
544	1	600	24	0	0	0	1	0	1	0	1	0	0	1	1	1	2	0	SF e glucosata	1	5	-1	7.41	7.24	24+0	1	0	-1	-1	0	0	0	0	0	0	0	0	0	xxxx	0	0	xxxx	1	prematurità estrema	2	0	1	0	0
545	1	580	24	0	0	0	1	0	1	0	1	0	0	0	1	0	0	0	xxxx	5	6	-1	7.42	7.36	24+0	1	0	-1	-1	0	0	0	0	0	0	0	0	0	xxxx	0	0	xxxx	1	prematurità estrema	4	0	1	0	0
546	1	1490	34.6	1	4	0	1	1	0	0	0	0	0	0	0	0	0	0	xxxx	0	9	10	-1	-1	34+0	0	9	9.39	0.6	0	0	5	0	0	0	0	0	0	xxxx	0	0	xxxx	0	xxxx	23	1	1	0	0
547	0	960	30	1	0	1	1	2	0	0	1	1	1	1	0	0	0	0	xxxx	6	8	-1	7.33	-1	30+0	1	0	9.66	-1	0	1	0	0	0	0	0	2	0	xxxx	0	0	xxxx	0	xxxx	57	1	1	0	0
548	1	1030	30	1	0	0	1	1	0	0	1	0	0	1	1	0	1	0	xxxx	6	8	-1	-1	7.26	30+0	1	0	-1	3.28	1	1	0	0	0	0	3	2	0	xxxx	0	0	xxxx	0	xxxx	47	1	1	0	0
549	0	2420	34.3	0	1	0	1	1	0	0	0	0	0	0	0	0	0	0	xxxx	7	9	-1	-1	-1	33+4	0	120	-1	0.41	1	1	4 + 5	0	0	1	2	0	0	xxxx	0	0	xxxx	0	xxxx	7	1	1	0	0
550	0	2370	34	0	0	1	1	1	0	0	0	0	0	0	0	0	0	0	xxxx	9	10	10	-1	-1	34+0	1	0	-1	-1	0	0	0	0	1	0	0	2	1	S1 G1	0	0	xxxx	0	xxxx	10	1	1	0	0
551	1	1405	34	1	0	0	1	1	0	0	0	0	0	0	0	0	0	0	xxxx	9	10	10	-1	-1	34+2	1	0	8.36	0.5	0	0	0	0	0	0	0	2	0	xxxx	0	0	xxxx	0	xxxx	24	1	1	0	0
552	0	2120	33.3	0	0	0	1	1	0	0	1	0	0	1	0	0	0	0	xxxx	6	8	-1	7.38	7.3	33+2	0	2	12.03	0.15	0	0	0	0	0	0	0	2	0	xxxx	0	0	xxxx	0	xxxx	33	1	1	0	0
553	1	1570	32.4	0	0	0	1	1	1	0	0	0	0	0	0	0	0	0	xxxx	9	10	10	-1	-1	32+3	0	7	8.07	0.55	1	1	0	0	0	0	0	2	0	xxxx	0	0	xxxx	0	xxxx	26	1	1	0	0
554	0	1610	32.4	0	0	0	1	1	1	0	0	0	0	0	0	0	0	0	xxxx	9	10	10	-1	-1	32+3	0	7	8.07	0.55	1	1	0	0	0	0	0	2	0	xxxx	0	0	xxxx	0	xxxx	24	1	1	0	0
555	0	2040	34.3	0	0	0	1	1	0	0	1	0	0	1	0	0	1	0	xxxx	4	8	-1	6.97	6.93	34+0	1	0	12.08	0.96	0	0	0	0	0	0	0	1	0	xxxx	0	0	xxxx	0	xxxx	12	1	1	0	0
556	1	1290	33	1	0	0	1	1	0	0	0	0	0	0	0	0	0	0	xxxx	9	10	10	-1	-1	33+4	1	0	10.44	-1	0	0	0	0	0	0	0	2	0	xxxx	0	0	xxxx	0	xxxx	29	1	1	0	0
557	1	1730	31	0	0	0	1	1	0	0	1	1	1	0	0	0	1	0	xxxx	8	9	-1	-1	-1	31+0	0	7	9.89	0.98	0	0	5	0	0	0	0	0	1	S2 G1	0	0	xxxx	0	xxxx	39	1	1	0	0
558	0	2640	33.8	0	0	0	0	0	0	0	0	0	0	0	0	0	0	0	xxxx	8	9	-1	-1	-1	31+3	0	408	8.91	0.11	2	7	4 + 5	0	0	0	0	2	0	xxxx	0	0	xxxx	0	xxxx	18	1	1	0	0
559	1	1945	31.6	0	5	0	0	0	0	0	0	0	0	0	0	0	0	0	xxxx	9	10	10	-1	-1	31+4	1	1	10.81	1.07	1	1	5	0	0	0	0	2	0	xxxx	0	0	xxxx	0	xxxx	38	1	1	0	0
560	0	1870	34	0	0	1	1	1	1	0	0	0	0	0	0	0	0	0	xxxx	9	9	-1	-1	-1	34+1	0	2	-1	-1	2	0	0	0	0	0	0	2	1	deciduite cronica	0	0	xxxx	0	xxxx	8	1	1	0	0
561	1	2450	34	0	0	1	1	1	1	0	0	0	0	0	0	0	0	0	xxxx	9	9	-1	-1	-1	34+1	0	2	-1	-1	2	0	0	0	0	0	0	2	0	xxxx	0	0	xxxx	0	xxxx	8	1	1	0	0
562	1	1595	34	1	0	0	1	1	1	0	0	0	0	0	0	0	0	0	xxxx	8	8	-1	-1	-1	34+4	1	0	9.96	-1	0	0	0	0	0	0	0	2	0	xxxx	0	0	xxxx	0	xxxx	19	1	1	0	0
563	0	1965	34	0	0	0	1	1	1	0	0	0	0	0	0	0	0	0	xxxx	8	9	-1	-1	-1	34+4	1	0	9.96	-1	0	0	0	0	0	0	0	2	0	xxxx	0	0	xxxx	0	xxxx	19	1	1	0	0
564	1	2180	32	0	0	0	1	2	0	0	1	0	0	1	0	0	0	0	xxxx	8	9	-1	7.36	7.33	32+0	1	0	10.52	0.77	0	0	0	0	0	0	0	2	0	xxxx	0	0	xxxx	0	xxxx	20	1	1	0	0
565	0	1905	33.2	0	0	0	1	1	1	0	0	0	0	0	0	0	0	0	xxxx	8	9	-1	-1	-1	33+1	1	0	14.86	0.43	1	1	0	0	0	0	0	2	0	xxxx	0	0	xxxx	0	xxxx	18	1	1	0	0
566	1	1665	33.2	0	0	0	1	1	1	0	0	0	0	0	0	0	0	0	xxxx	8	9	-1	-1	-1	33+1	1	0	14.86	0.43	1	1	0	0	0	0	0	2	0	xxxx	0	0	xxxx	0	xxxx	18	1	1	0	0
567	1	1750	31	0	0	0	1	1	0	0	1	0	0	0	1	0	2	0	SF 15ml/kg	1	5	10	7.09	7.03	31+0	1	0	12.04	0.17	0	0	0	0	0	0	0	2	0	xxxx	0	0	xxxx	0	xxxx	16	1	1	0	0
568	1	2450	32	0	0	0	1	1	0	0	0	0	0	0	0	0	0	0	xxxx	8	9	-1	-1	-1	31+6	0	96	9.06	0.05	1	1	4 + 5	0	0	0	0	2	0	xxxx	0	0	xxxx	0	xxxx	15	1	1	0	0
569	1	1595	32	0	0	0	1	1	1	0	1	1	1	0	0	0	0	0	xxxx	6	9	-1	7.32	7.25	32+0	1	0	6.69	0.63	15	1	0	0	1	0	0	2	0	xxxx	0	0	xxxx	0	xxxx	31	1	1	0	0
570	1	1330	32	1	0	0	1	1	1	0	0	0	0	0	0	0	0	0	xxxx	8	9	-1	7.28	7.24	32+0	1	0	6.69	0.63	15	1	0	0	1	0	0	2	0	xxxx	0	0	xxxx	0	xxxx	31	1	1	0	0
571	0	800	31.6	1	0	0	1	1	0	0	1	0	0	1	1	0	3	0	xxxx	5	7	9	7.4	7.35	31+0	1	0	10.13	-1	0	0	0	0	1	0	1	2	0	xxxx	0	0	xxxx	1	Infezione/MAS	113	0	1	0	1
572	1	1345	34	1	0	1	1	1	0	0	1	0	1	1	0	0	1	0	xxxx	6	8	-1	7.37	7.35	34+0	1	0	7.43	-1	0	0	0	0	0	0	0	2	0	xxxx	0	0	xxxx	0	xxxx	42	1	1	0	0
573	1	1590	34	1	0	1	1	1	1	0	0	0	0	0	0	0	0	0	xxxx	9	10	10	-1	-1	34+0	1	0	-1	-1	1	0	0	0	0	0	0	2	0	xxxx	0	0	xxxx	0	xxxx	20	1	1	0	0
574	1	2400	34	0	0	1	1	1	1	0	0	0	0	0	0	0	0	0	xxxx	9	10	10	-1	-1	34+0	1	0	-1	-1	1	0	0	0	0	0	0	2	0	xxxx	0	0	xxxx	0	xxxx	26	1	1	0	0
575	0	1000	27.8	0	0	1	1	1	1	0	1	0	1	1	0	0	0	0	xxxx	6	9	9	7.35	7.3	27+6	1	0	11.81	0.86	8	8	4 + 5	0	0	0	0	2	0	xxxx	0	0	xxxx	0	xxxx	78	1	1	0	0
576	1	1235	27.8	0	0	1	1	1	1	0	1	0	1	1	0	0	1	0	xxxx	6	7	-1	7.37	7.33	27+6	1	0	11.81	0.86	8	8	4 + 5	0	0	0	0	2	0	xxxx	0	0	xxxx	0	xxxx	85	1	1	0	0
577	0	1290	30	0	0	0	0	0	0	0	1	0	0	1	1	0	1	0	xxxx	4	8	-1	7.28	-1	30+0	0	0	13.59	1.03	0	0	5	0	0	0	0	1	0	xxxx	0	0	xxxx	0	xxxx	45	1	1	0	0
578	1	1975	34	0	0	0	0	1	0	0	0	0	0	0	0	0	0	0	xxxx	8	9	-1	-1	-1	24+0	0	1680	9.49	0.52	8	1	14	0	0	1	0	2	0	xxxx	0	0	xxxx	0	xxxx	13	1	1	0	0
579	0	1190	31.4	0	0	0	1	1	0	0	1	0	1	1	1	0	1	0	xxxx	6	7	10	7.18	7.13	31+3	1	0	13.9	1.41	0	0	0	0	0	0	0	1	0	xxxx	0	0	xxxx	0	xxxx	38	1	1	0	0
580	1	2050	34.8	0	0	0	1	1	1	0	0	0	0	0	0	0	0	0	xxxx	8	9	-1	-1	-1	34+0	1	0	7.62	0.28	0	0	0	0	0	0	0	0	0	xxxx	0	0	xxxx	0	xxxx	15	1	1	0	0
581	0	1700	34.8	1	0	0	1	1	1	0	0	0	0	0	0	0	0	0	xxxx	8	9	-1	-1	-1	34+0	1	0	7.62	0.28	0	0	0	0	0	0	0	0	0	xxxx	0	0	xxxx	0	xxxx	15	1	1	0	0
582	0	2600	34.4	0	0	0	1	1	0	0	1	0	0	1	0	0	0	0	xxxx	6	8	-1	7.37	7.3	34+3	1	0	-1	-1	0	0	0	0	0	0	0	0	0	xxxx	0	0	xxxx	0	xxxx	10	1	1	0	0
583	0	1490	36	1	0	0	1	1	0	0	0	0	0	0	0	0	0	0	xxxx	8	9	-1	-1	-1	36+2	1	0	9.24	0.3	2	1	2	0	0	0	0	2	0	xxxx	0	0	xxxx	0	xxxx	20	1	1	0	0
584	1	2400	33.7	0	0	0	1	1	0	0	0	0	0	0	0	0	0	0	xxxx	9	10	10	-1	-1	31+0	0	480	12.63	0.19	6	0	4 + 5	0	0	0	0	2	0	xxxx	0	0	xxxx	0	xxxx	10	1	1	0	0
585	0	1600	31.3	0	5	0	1	1	0	3	1	0	1	1	0	0	2	0	xxxx	6	7	7	7.31	7.24	31+1	0	24	11.19	0.05	0	0	4 + 5	0	0	0	0	2	0	xxxx	0	0	xxxx	0	xxxx	41	1	1	0	0
586	1	1450	32	0	0	0	1	1	0	0	1	1	0	1	0	0	1	0	xxxx	4	9	-1	7.14	7.05	32+0	1	0	8.76	-1	0	0	0	0	1	0	0	2	0	xxxx	0	0	xxxx	0	xxxx	48	1	1	0	0
587	0	1230	32.8	1	5	0	1	1	0	0	1	0	0	1	0	0	0	0	xxxx	7	9	-1	7.27	7.25	32+6	1	0	8.51	-1	0	0	0	0	0	0	0	2	0	xxxx	0	0	xxxx	0	xxxx	33	1	1	0	0
588	1	1490	29.3	0	1	0	1	1	0	0	1	0	1	1	0	0	1	0	xxxx	3	8	-1	7.4	7.34	29+2	1	0	9.87	0.3	5	0	4 + 5	0	0	0	0	1	0	xxxx	0	0	xxxx	0	xxxx	94	1	1	0	0
589	0	400	27.6	1	0	1	1	1	0	0	1	0	0	1	1	0	3	1	Adrenalina in TET 3 dosi	1	4	6	7.09	7.05	27+4	1	0	6.26	2.57	0	0	0	0	1	0	2	2	0	xxxx	0	0	xxxx	1	IVH e prematurità estrema	2	0	1	0	0
590	1	2375	32.6	0	0	0	1	1	0	0	0	0	0	0	0	0	0	0	xxxx	9	10	10	7.37	7.34	32+4	0	9	13.2	0.05	0	0	0	0	0	0	0	1	0	xxxx	0	0	xxxx	0	xxxx	12	1	1	0	0
591	1	1675	33.4	0	0	0	1	1	0	0	0	0	0	0	0	0	0	0	xxxx	9	10	10	-1	-1	33+3	1	0	8.73	2.08	0	0	0	0	1	0	0	2	0	xxxx	0	0	xxxx	0	xxxx	19	1	1	0	0
592	1	780	28.6	1	0	0	1	1	0	0	1	0	1	1	0	0	1	0	xxxx	4	7	8	7.356	-1	28+4	1	0	7.99	-1	0	3	0	0	0	0	0	2	0	xxxx	0	0	xxxx	0	xxxx	265	1	1	0	1
593	1	1820	34.2	0	0	0	1	1	1	0	0	0	0	0	0	0	0	0	xxxx	9	9	-1	7.36	7.3	34+1	0	4	9.21	0.71	0	0	0	0	0	0	0	0	0	xxxx	0	0	xxxx	0	xxxx	13	1	1	0	0
594	0	1785	34.2	0	0	0	1	1	1	0	0	0	0	0	0	0	0	0	xxxx	8	9	-1	7.31	7.27	34+1	1	0	9.21	0.71	0	0	0	0	0	0	0	0	0	xxxx	0	0	xxxx	0	xxxx	13	1	1	0	0
595	0	330	25.8	1	0	1	0	0	1	0	1	0	0	1	1	0	3	0	xxxx	1	4	5	7.36	7.25	24+5	0	192	7.93	1.83	2	0	0	1	0	1	0	0	1	S2 G1	1	0	xxxx	1	prematurità estrema e iposviluppo	2	0	1	1	0
596	0	820	25.8	0	0	1	1	1	1	0	1	0	0	0	1	0	1	0	xxxx	6	7	-1	7.39	7.3	24+5	0	192	7.93	1.83	2	0	0	1	0	1	0	0	1	S3 G2	1	1	S1 G2	0	xxxx	122	1	1	0	1
597	1	1975	31.8	0	0	1	1	1	1	0	0	0	0	0	0	0	0	0	xxxx	9	10	10	7.36	-1	31+6	1	0	9.7	-1	0	0	0	0	0	0	0	2	0	xxxx	0	0	xxxx	0	xxxx	44	1	4	0	0
598	0	1855	31.8	0	0	1	1	1	1	0	0	0	0	0	0	0	0	0	xxxx	7	9	-1	7.34	-1	31+6	1	0	9.7	-1	0	0	0	0	0	0	0	2	0	xxxx	0	0	xxxx	0	xxxx	44	1	1	0	0
599	1	1440	31.8	0	0	1	1	1	1	0	0	0	0	0	0	0	0	0	xxxx	8	9	9	7.26	-1	31+6	1	0	9.7	-1	0	0	0	0	0	0	0	2	0	xxxx	0	0	xxxx	0	xxxx	44	1	1	0	0
600	1	2770	34	0	0	0	1	1	0	0	0	0	0	0	0	0	0	0	xxxx	8	9	-1	-1	-1	34+0	1	0	7.01	-1	0	1	0	0	0	0	0	0	0	xxxx	0	0	xxxx	0	xxxx	5	1	1	0	0
601	0	1950	34	0	0	1	1	1	1	0	0	0	0	0	0	0	0	0	xxxx	9	10	10	-1	-1	34+0	1	0	5.54	0.28	0	0	0	0	0	0	0	0	0	xxxx	0	0	xxxx	0	xxxx	10	1	1	0	0
602	0	2290	34	0	0	1	1	1	1	0	0	0	0	0	0	0	0	0	xxxx	8	9	9	-1	-1	34+0	1	0	5.54	0.28	0	0	0	0	0	0	0	0	0	xxxx	0	0	xxxx	0	xxxx	10	1	1	0	0
603	1	1875	32.2	0	0	0	1	1	1	0	1	0	1	0	1	0	1	0	xxxx	7	8	7	7.35	7.32	32+1	1	0	9.24	0.21	1	0	0	0	0	0	2	2	0	xxxx	0	0	xxxx	0	xxxx	54	1	1	0	1
604	1	1655	32.2	0	0	0	1	1	1	0	1	0	1	0	1	0	1	0	xxxx	8	9	-1	-1	7.38	32+1	1	0	9.24	0.21	1	0	0	0	0	0	3	2	0	xxxx	0	0	xxxx	0	xxxx	61	1	1	0	0
605	1	2490	32.7	0	0	0	1	1	0	0	0	0	0	0	0	0	0	0	xxxx	8	8	-1	7.4	7.29	32+5	1	0	7.92	-1	2	0	4 + 5	0	0	0	0	2	0	xxxx	0	0	xxxx	0	xxxx	25	1	1	0	0
606	1	2050	32	0	0	0	1	1	0	0	0	0	0	0	0	0	0	0	xxxx	9	10	10	-1	-1	32+0	1	0	11.65	0.26	0	0	0	0	0	0	0	2	0	xxxx	0	0	xxxx	0	xxxx	21	1	1	0	0
607	0	1600	33.3	0	0	0	1	1	0	0	0	0	0	0	0	0	0	0	xxxx	8	9	-1	-1	-1	33+2	1	0	5.46	-1	0	0	0	0	0	0	0	2	0	xxxx	0	0	xxxx	0	xxxx	24	1	1	0	0
608	0	2045	34	0	0	1	1	1	1	0	0	0	0	0	0	0	0	0	xxxx	9	10	10	7.36	7.3	33+6	0	36	14.26	0.98	0	0	4 + 5	0	0	0	0	2	0	xxxx	0	0	xxxx	0	xxxx	7	1	1	0	0
609	1	1995	34	0	0	1	1	1	1	0	0	0	0	0	0	0	0	0	xxxx	9	10	10	7.36	7.28	33+6	0	36	14.26	0.98	0	0	4 + 5	0	0	0	0	2	0	xxxx	0	0	xxxx	0	xxxx	7	1	1	0	0
610	1	1465	33.6	1	0	0	1	1	0	0	0	0	0	0	0	0	0	0	xxxx	9	10	10	-1	-1	33+5	1	0	6.67	-1	0	0	0	0	0	0	0	2	0	xxxx	0	0	xxxx	0	xxxx	30	1	1	0	0
611	0	1795	33	0	0	0	1	1	0	0	0	0	0	0	0	0	0	0	xxxx	8	9	-1	-1	-1	33+0	1	0	8.28	0.7	0	1	0	0	0	0	0	0	0	xxxx	0	0	xxxx	0	xxxx	25	1	1	0	0
612	0	2165	34.6	0	0	1	1	1	1	0	0	0	0	0	0	0	0	0	xxxx	8	9	-1	-1	-1	34+4	1	0	9.72	0.46	0	0	0	0	0	0	0	2	0	xxxx	0	0	xxxx	0	xxxx	8	1	1	0	0
613	0	1840	34.6	0	0	1	1	1	1	0	0	0	0	0	0	0	0	0	xxxx	9	10	10	-1	-1	34+4	1	0	9.72	0.46	0	0	0	0	0	0	0	2	0	xxxx	0	0	xxxx	0	xxxx	8	1	1	0	0
614	1	1895	34.8	0	0	0	1	1	0	0	0	0	0	0	0	0	0	0	xxxx	8	9	-1	-1	-1	34+6	1	0	10.98	-1	1	0	0	0	0	0	2	2	0	xxxx	0	0	xxxx	0	xxxx	10	1	1	0	0
615	0	2175	34.4	0	0	1	1	1	0	0	0	0	0	0	0	0	0	0	xxxx	7	9	-1	-1	-1	34+3	1	0	11.22	0.48	0	0	0	0	1	0	0	0	0	xxxx	0	0	xxxx	0	xxxx	11	1	1	0	0
616	0	1260	29.7	0	0	0	1	1	0	0	1	0	1	0	0	0	1	0	xxxx	7	9	-1	7.44	7.36	27+0	0	456	9.34	0.81	15	7	4 + 5 + 7	0	0	1	0	2	1	S2 G1	0	0	xxxx	0	xxxx	58	1	1	0	0
617	1	2360	34.4	0	0	1	0	0	0	0	0	0	0	0	0	0	0	0	xxxx	9	10	10	-1	-1	34+0	0	72	17.42	0.34	0	0	5	0	0	0	0	0	0	xxxx	0	0	xxxx	0	xxxx	7	1	1	0	0
618	0	870	26	0	1	0	0	0	0	0	1	0	0	1	1	1	3	0	xxxx	-1	-1	-1	-1	-1	26+0	0	1	-1	-1	0	0	0	0	0	0	0	0	0	xxxx	0	0	xxxx	0	xxxx	105	1	1	0	0
619	0	925	31	1	0	0	1	1	0	0	1	0	1	0	0	0	1	0	xxxx	8	9	-1	7.36	7.29	31+0	1	0	9.47	0.64	0	0	0	0	1	0	0	0	0	xxxx	0	0	xxxx	0	xxxx	43	1	1	0	0
620	1	1620	31	0	0	0	1	2	0	0	1	1	0	1	0	0	1	0	xxxx	6	9	-1	7.3	7.26	31+0	1	0	9.46	-1	0	0	0	0	1	0	0	2	0	xxxx	0	0	xxxx	0	xxxx	42	1	1	0	0
621	0	1975	34.3	0	0	0	1	1	0	0	0	0	0	0	0	0	0	0	xxxx	8	9	-1	-1	-1	29+5	0	600	11.43	0.05	1	1	4 + 5	0	0	0	2	2	0	xxxx	0	0	xxxx	0	xxxx	10	1	1	0	0
622	1	1030	27.6	0	1	0	0	0	0	0	1	0	0	1	1	0	1	0	xxxx	7	7	9	7.33	7.25	27+0	0	144	8.59	2.42	1	1	0	0	0	0	0	2	0	xxxx	0	0	xxxx	0	xxxx	63	1	1	0	0
623	0	700	24.7	0	0	0	0	0	0	0	1	0	0	1	1	0	1	0	adrenalina in TET + Bicarbonati	1	6	8	6.8	-1	24+5	1	0	21.85	1.95	0	0	4 + 5 + 10	0	0	0	0	2	0	xxxx	1	0	xxxx	1	perforazione intestinale	39	0	1	0	0
624	0	1240	29.2	0	0	1	1	1	1	0	1	1	1	1	0	0	1	0	xxxx	6	8	-1	-1	-1	29+1	0	8	11.62	-1	5 + 9	0	0	0	0	0	0	2	1	S1 G1	0	0	xxxx	0	xxxx	62	1	1	0	0
625	0	1175	29.2	0	0	1	1	1	1	0	1	0	1	1	0	0	1	0	xxxx	8	9	10	7.39	-1	29+1	0	8	11.62	-1	5 + 9	0	0	0	0	0	0	2	0	xxxx	0	0	xxxx	0	xxxx	62	1	1	0	0
626	1	560	25.3	0	0	0	1	1	1	0	1	0	0	1	1	0	1	0	xxxx	5	7	7	-1	-1	25+2	1	0	11.33	1.63	1	1	4 + 5 + 10 + 14	0	0	0	3	2	0	xxxx	0	0	xxxx	0	xxxx	177	1	1	0	1
627	1	775	25.3	0	0	0	1	1	1	0	1	0	0	1	1	0	3	0	xxxx	5	6	8	7.37	-1	23+0	0	456	11.33	1.63	1	1	4 + 5 + 10 + 14	0	0	0	3	2	0	xxxx	0	0	xxxx	0	xxxx	177	1	1	0	1
628	1	2345	34.6	0	0	0	1	1	0	0	1	1	1	0	0	0	0	0	xxxx	6	10	10	-1	-1	34+4	1	0	6.88	-1	0	1	0	0	0	0	0	2	0	xxxx	0	0	xxxx	0	xxxx	18	1	1	0	0
629	1	2045	34.8	0	0	0	1	1	1	0	0	0	0	0	0	0	0	0	xxxx	8	9	-1	-1	-1	34+6	1	0	6.11	-1	15	1	0	0	0	0	0	2	0	xxxx	0	0	xxxx	0	xxxx	5	1	1	0	0
630	1	2300	34.8	0	0	0	1	1	1	0	0	0	0	0	0	0	0	0	xxxx	9	10	10	-1	-1	34+6	1	0	6.11	-1	15	1	0	0	0	0	0	2	0	xxxx	0	0	xxxx	0	xxxx	5	1	1	0	0
631	0	2000	33.8	0	0	0	1	1	0	0	0	0	0	0	0	0	0	0	xxxx	9	10	10	7.39	7.34	33+6	1	0	12.53	0.44	1	0	0	0	0	0	0	2	0	xxxx	0	0	xxxx	0	xxxx	15	1	1	0	0
632	1	1340	32	1	0	0	1	2	0	0	1	0	1	1	0	0	1	0	xxxx	3	8	-1	7.34	7.28	32+0	1	0	4.38	0.05	0	0	0	0	0	0	0	2	0	xxxx	0	0	xxxx	0	xxxx	20	1	1	0	0
633	1	1925	33.6	0	2	0	1	1	1	0	1	0	1	0	0	0	0	0	xxxx	6	8	-1	7.4	7.37	33+4	1	0	7.42	0.36	2	0	0	0	0	0	0	2	0	xxxx	0	0	xxxx	0	xxxx	24	1	1	0	0
634	0	1830	33.6	0	2	0	1	1	1	0	1	0	1	0	0	0	1	0	xxxx	6	8	-1	7.4	7.36	33+4	1	0	7.42	0.36	2	0	0	0	0	0	0	2	0	xxxx	0	0	xxxx	0	xxxx	24	1	1	0	0
635	0	2400	34.3	0	0	0	1	1	1	0	0	0	0	0	0	0	0	0	xxxx	9	10	10	-1	-1	34+2	1	0	-1	0.91	1	0	0	0	0	0	0	0	0	xxxx	0	0	xxxx	0	xxxx	8	1	1	0	0
636	0	2080	34.3	0	0	0	1	1	1	0	0	0	0	0	0	0	0	0	xxxx	9	10	10	-1	-1	34+2	1	0	-1	0.91	1	0	0	0	0	0	0	0	0	xxxx	0	0	xxxx	0	xxxx	8	1	1	0	0
637	0	900	28.3	0	0	0	1	1	0	0	1	0	0	1	1	0	3	0	xxxx	6	7	-1	7.39	-1	22+0	0	1056	9.07	0.19	1	0	0	0	0	0	1	2	0	xxxx	0	0	xxxx	0	xxxx	69	1	1	0	0
638	1	1030	29.7	0	0	1	1	1	1	0	1	0	1	1	0	0	1	0	xxxx	6	8	-1	7.39	7.33	28+4	0	168	8.76	0.37	2	0	1 + 4 + 5	0	0	0	0	2	0	xxxx	0	0	xxxx	0	xxxx	50	1	1	0	0
639	0	1190	29.7	0	0	1	1	1	1	0	1	0	1	1	0	0	1	0	xxxx	6	7	-1	7.32	-1	29+5	1	0	8.76	0.37	2	0	1 + 4 + 5	0	0	0	0	2	0	xxxx	0	0	xxxx	0	xxxx	50	1	1	0	0
640	0	1760	34.6	0	5	0	1	1	1	0	0	0	0	0	0	0	0	0	xxxx	9	10	10	-1	-1	34+5	1	0	-1	-1	0	0	0	0	0	0	0	0	0	xxxx	0	0	xxxx	0	xxxx	45	1	1	0	0
641	0	2180	34.6	0	5	0	1	1	1	0	0	0	0	0	0	0	0	0	xxxx	9	10	10	-1	-1	34+5	1	0	-1	-1	0	0	0	0	0	0	0	0	0	xxxx	0	0	xxxx	0	xxxx	6	1	1	0	0
642	1	1960	34	0	5	0	1	1	1	0	0	0	0	0	0	0	0	0	xxxx	9	10	10	7.4	7.29	34+0	1	0	5.94	0.64	15	0	0	0	0	0	0	0	0	xxxx	0	0	xxxx	0	xxxx	22	1	1	0	0
643	0	1960	34	0	5	0	1	1	1	0	0	0	0	0	0	0	0	0	xxxx	9	10	10	-1	-1	34+0	1	0	5.94	0.64	15	0	0	0	0	0	0	0	0	xxxx	0	0	xxxx	0	xxxx	22	1	1	0	0
644	0	1400	32	0	0	0	1	1	1	0	0	0	0	0	0	0	0	0	xxxx	8	9	-1	-1	-1	32+0	1	0	10.28	0.05	0	0	0	0	1	0	0	2	0	xxxx	0	0	xxxx	0	xxxx	30	1	1	0	0
645	1	2600	34	0	0	0	0	0	0	0	0	0	0	0	0	0	0	0	xxxx	9	10	10	-1	-1	33+6	0	30	12.22	0.93	0	0	5	0	0	0	0	0	0	xxxx	0	0	xxxx	0	xxxx	6	1	1	0	0
646	1	2030	33.8	0	0	0	1	1	1	0	0	0	0	0	0	0	0	0	xxxx	9	10	10	-1	-1	33+6	0	9	5.95	-1	0	0	0	0	1	0	0	2	0	xxxx	0	0	xxxx	0	xxxx	11	1	1	0	0
647	1	2275	33.8	0	0	0	1	1	1	0	0	0	0	0	0	0	0	0	xxxx	9	10	10	-1	-1	33+6	0	9	5.95	-1	0	0	0	0	1	0	0	2	0	xxxx	0	0	xxxx	0	xxxx	11	1	1	0	0
648	1	1380	30.8	0	0	0	1	1	0	0	0	0	0	0	0	0	0	0	xxxx	9	10	10	7.31	7.24	26+0	0	674	20.57	2.4	1	1	2 + 4	0	0	1	2	2	1	S1 G2	1	0	xxxx	0	xxxx	33	1	1	0	0
649	0	1550	33.8	0	0	1	1	1	1	0	0	0	0	0	0	0	0	0	xxxx	9	10	10	-1	-1	33+6	1	0	5.27	0.37	1	0	0	0	1	0	0	2	0	xxxx	0	0	xxxx	0	xxxx	21	1	1	0	0
650	0	1930	33.8	0	0	1	1	1	1	0	0	0	0	0	0	0	0	0	xxxx	9	10	10	-1	-1	33+6	1	0	5.27	0.37	1	0	0	0	1	0	0	2	0	xxxx	0	0	xxxx	0	xxxx	12	1	1	0	0
651	1	2220	33.4	0	0	0	1	1	0	0	0	0	0	0	0	0	0	0	xxxx	8	9	10	-1	-1	32+4	0	144	19.42	4.33	1	1	4 + 5	0	0	0	2	2	1	S2 G2	1	0	xxxx	0	xxxx	10	1	1	0	0
652	1	610	26.3	1	1	0	1	1	0	0	1	0	0	1	1	0	3	0	xxxx	3	7	-1	6.8	-1	26+2	1	0	7.76	-1	0	1	0	0	0	0	0	2	0	xxxx	0	0	xxxx	0	xxxx	92	1	1	0	0
653	1	1190	35	1	0	1	1	1	1	0	0	0	0	0	0	0	0	0	xxxx	9	9	-1	-1	-1	35+0	1	0	-1	-1	0	0	0	0	0	0	0	2	0	xxxx	0	0	xxxx	0	xxxx	28	1	1	0	0
654	1	2470	33.3	0	0	0	1	1	0	0	1	0	1	1	0	0	1	0	xxxx	6	8	-1	7.39	7.33	33+2	0	4	13.6	5.64	0	0	5	0	0	0	0	1	1	S2 G1	1	1	S1 G1	0	xxxx	14	1	1	0	0
655	1	2145	34.6	0	0	0	0	0	0	0	0	0	0	0	0	0	0	0	xxxx	8	9	-1	7.25	7.17	34+3	0	24	8.38	0.29	0	0	0	0	0	0	0	0	0	xxxx	0	0	xxxx	0	xxxx	11	1	1	0	0
656	1	2465	34.6	0	0	0	0	0	0	0	1	0	1	0	0	0	1	0	xxxx	7	8	-1	7.37	7.29	34+5	1	0	-1	-1	0	0	0	0	0	0	0	0	0	xxxx	0	0	xxxx	0	xxxx	8	1	1	0	0
657	1	2405	34.7	0	0	0	1	2	0	0	1	0	0	1	1	0	0	0	xxxx	4	8	-1	7.34	7.3	34+4	0	20	7.98	0.1	0	0	4 + 5	0	0	0	0	0	0	xxxx	0	0	xxxx	0	xxxx	5	1	1	0	0
658	1	2470	34.8	0	0	0	1	1	0	0	0	0	0	0	0	0	0	0	xxxx	8	9	-1	-1	-1	34+6	1	0	10.1	-1	0	1	0	0	0	0	0	0	0	xxxx	0	0	xxxx	0	xxxx	7	1	1	0	0
659	0	1955	34	0	0	0	1	1	0	0	0	0	0	0	0	0	0	0	xxxx	9	10	10	-1	-1	34+0	0	2	10.74	0.43	0	0	0	0	0	0	0	0	0	xxxx	0	0	xxxx	0	xxxx	11	1	1	0	0
660	1	2145	34	0	0	0	1	1	0	0	1	0	0	1	0	0	0	0	xxxx	6	8	8	7.33	7.26	33+4	0	72	11.71	0.11	0	0	4 + 5	0	0	0	2	2	0	xxxx	0	0	xxxx	0	xxxx	10	1	1	0	0
661	1	2005	34	0	0	0	1	1	1	0	0	0	0	0	0	0	0	0	xxxx	9	10	10	-1	-1	34+0	1	0	11.73	0.51	15	0	0	0	0	0	0	2	0	xxxx	0	0	xxxx	0	xxxx	8	1	1	0	0
662	1	1910	34	0	0	0	1	1	1	0	0	0	0	0	0	0	0	0	xxxx	9	9	-1	7.36	7.3	34+0	1	0	11.73	0.51	15	0	0	0	0	0	0	2	0	xxxx	0	0	xxxx	0	xxxx	8	1	1	0	0
663	1	440	25.7	1	0	0	1	1	0	0	1	0	0	1	1	0	1	0	xxxx	4	7	-1	7.22	7.22	25+5	1	0	15.69	5.11	1	0	4 + 5	0	1	0	0	2	0	xxxx	1	0	xxxx	0	xxxx	144	1	1	0	1
664	1	364	24.3	1	0	1	1	1	0	0	1	0	0	0	1	0	1	0	xxxx	5	7	8	-1	-1	24+2	1	0	14.01	0.05	0	0	0	0	1	0	0	2	0	xxxx	0	0	xxxx	1	prematurità estrema	9	0	1	0	0
665	0	1750	34.6	0	0	1	1	1	0	0	0	0	0	0	0	0	0	0	xxxx	8	9	-1	-1	-1	34+5	1	0	-1	-1	0	0	0	0	0	0	0	2	0	xxxx	0	0	xxxx	0	xxxx	14	1	1	0	0
666	1	1975	34.6	0	0	0	1	1	0	0	0	0	0	0	0	0	0	0	xxxx	8	9	-1	-1	-1	34+4	1	0	11.06	-1	0	0	0	0	0	0	0	0	0	xxxx	0	0	xxxx	0	xxxx	25	1	1	0	0
667	0	1600	33.6	0	0	0	1	1	0	0	0	0	0	0	0	0	0	0	xxxx	9	10	10	-1	-1	33+4	1	0	7.89	0.81	0	0	0	0	0	0	0	2	0	xxxx	0	0	xxxx	0	xxxx	20	1	1	0	0
668	0	1610	33	0	0	1	1	1	0	0	0	0	0	0	0	0	0	0	xxxx	7	9	-1	7.36	7.34	33+0	0	3	13.46	-1	14	0	0	0	0	0	0	2	0	xxxx	0	0	xxxx	0	xxxx	26	1	1	0	0
669	1	2245	34.8	0	0	0	0	0	0	0	0	0	0	0	0	0	0	0	xxxx	9	10	10	-1	-1	34+5	0	18	9.33	0.33	1	0	5	0	0	0	0	0	0	xxxx	0	0	xxxx	0	xxxx	7	1	1	0	0
670	0	1580	32.3	0	0	0	1	1	1	0	0	0	0	0	0	0	0	0	xxxx	9	10	10	-1	-1	32+2	1	0	12.15	0.16	15	0	0	0	0	0	0	2	0	xxxx	0	0	xxxx	0	xxxx	24	1	1	0	0
671	0	1690	32.3	0	0	0	1	1	1	0	0	0	0	0	0	0	0	0	xxxx	9	9	-1	-1	-1	32+2	1	0	12.15	0.16	15	0	0	0	0	0	0	2	0	xxxx	0	0	xxxx	0	xxxx	24	1	1	0	0
672	0	1900	33	0	0	0	1	1	0	0	0	0	0	0	0	0	0	0	xxxx	8	9	-1	-1	-1	28+0	0	840	14.65	0.43	0	0	0	0	0	0	0	2	0	xxxx	0	0	xxxx	0	xxxx	14	1	1	0	0
673	0	1770	32.6	0	0	0	1	1	0	0	0	0	0	0	0	0	0	0	xxxx	8	9	-1	7.39	7.35	32+4	0	2	12.1	-1	0	0	0	0	0	0	0	2	0	xxxx	0	0	xxxx	0	xxxx	24	1	1	0	0
674	0	950	26.7	0	0	0	0	0	0	0	0	0	0	0	0	0	0	0	xxxx	9	9	-1	-1	-1	26+5	0	2	14.15	2.53	1	1	6 + 10	0	0	1	0	1	0	xxxx	1	0	xxxx	0	xxxx	64	1	1	0	0
675	0	1870	32.6	0	0	0	1	1	0	0	1	0	1	0	0	0	0	0	xxxx	7	9	-1	7.38	7.28	32+4	0	5	-1	-1	0	0	-1	0	0	0	0	0	0	xxxx	0	0	xxxx	0	xxxx	18	1	1	0	0
676	1	2525	34.8	0	0	1	1	1	0	0	0	0	0	0	0	0	0	0	xxxx	9	10	10	-1	-1	34+6	1	0	7.15	-1	0	0	0	0	0	0	0	2	0	xxxx	0	0	xxxx	0	xxxx	5	1	1	0	0
677	1	1490	32	0	0	0	1	1	0	0	0	0	0	0	0	0	0	0	xxxx	9	10	10	-1	-1	32+0	1	0	10.65	2.28	0	0	0	0	1	0	0	2	0	xxxx	0	0	xxxx	0	xxxx	31	1	1	0	0
678	1	1470	31.3	0	0	1	1	1	0	0	0	0	0	0	0	0	0	0	xxxx	9	10	10	7.39	7.32	31+0	0	72	11.88	0.83	1	1	4 + 5	0	0	0	0	2	0	xxxx	0	0	xxxx	0	xxxx	38	1	1	0	0
679	1	2065	31	0	0	0	1	1	0	0	1	0	1	1	0	0	0	0	xxxx	6	9	-1	7.39	7.29	31+3	0	6	15.33	3.8	1	0	4 + 5	0	0	0	0	2	0	xxxx	1	0	xxxx	0	xxxx	30	1	1	0	0
680	1	2025	34	0	0	0	1	1	0	0	0	0	0	0	0	0	0	0	xxxx	9	9	9	-1	-1	34+0	1	0	11.78	0.2	0	0	0	0	0	0	2	2	0	xxxx	0	0	xxxx	0	xxxx	8	1	1	0	0
681	0	1490	33.8	1	0	0	1	1	0	0	1	0	1	0	0	0	0	0	xxxx	7	8	8	7.42	7.36	33+6	1	0	7.39	-1	1	1	0	0	1	0	0	2	0	xxxx	0	0	xxxx	0	xxxx	32	1	1	0	0
682	1	880	25.6	0	0	0	0	0	0	0	1	0	1	0	1	0	1	0	xxxx	7	8	-1	7.49	7.27	25+4	0	12	8.87	0.53	2	1	5	0	0	0	0	2	0	xxxx	0	0	xxxx	0	xxxx	120	1	15	0	1
683	1	570	22.6	0	0	0	0	0	1	0	1	0	0	0	1	1	3	0	xxxx	1	5	6	6.89	6.88	22+5	1	0	19.04	3.44	15	1	4 + 5	0	0	0	0	0	1	S2 G1	1	1	S1 G1	1	prematurità estrema	3	0	1	0	0
684	0	2775	34	0	0	0	1	1	0	0	0	0	0	0	0	0	0	0	xxxx	8	9	-1	-1	-1	34+0	1	0	8.84	0.74	0	0	0	0	0	0	0	0	0	xxxx	0	0	xxxx	0	xxxx	8	1	1	0	0
685	0	900	27.6	0	0	0	1	1	1	0	1	0	1	1	0	0	2	0	xxxx	7	8	-1	-1	-1	27+2	0	72	12.21	0.4	0	0	4 + 5	0	0	0	0	2	0	xxxx	0	0	xxxx	0	xxxx	81	1	1	0	1
686	0	1100	27.6	0	0	0	1	1	1	0	1	2	1	0	0	0	1	0	xxxx	6	8	-1	-1	-1	27+2	0	72	12.21	0.4	0	0	4 + 5	0	0	0	0	2	0	xxxx	0	0	xxxx	0	xxxx	73	1	1	0	0
687	0	2345	34.2	0	0	1	1	1	1	0	0	0	0	0	0	0	0	0	xxxx	9	10	10	-1	-1	34+1	1	0	13.4	-1	1	1	14	0	0	0	0	0	0	xxxx	0	0	xxxx	0	xxxx	12	1	1	0	0
688	0	2455	34.2	0	0	1	1	1	1	0	0	0	0	0	0	0	0	0	xxxx	9	10	10	-1	-1	34+1	1	0	13.4	-1	1	1	14	0	0	0	0	0	0	xxxx	0	0	xxxx	0	xxxx	12	1	1	0	0
689	0	1545	31	0	0	1	1	1	0	0	1	1	1	1	0	0	1	0	xxxx	6	8	9	7.39	7.33	29+6	0	48	9.96	0.72	1	1	4 + 5	0	0	0	0	2	1	S2 G2	0	1	S1 G1	0	xxxx	30	1	1	0	0
690	0	1880	33.6	0	0	0	0	0	0	0	0	0	0	0	0	0	0	0	xxxx	9	10	10	-1	-1	33+4	0	12	10.53	-1	1	0	0	0	0	0	0	0	0	xxxx	0	0	xxxx	0	xxxx	11	1	1	0	0
691	1	1755	30.3	0	0	1	1	1	1	0	1	0	0	1	0	0	1	0	xxxx	5	7	9	7.41	-1	30+2	1	0	8.02	0.23	0	0	0	0	0	0	0	2	0	xxxx	0	0	xxxx	0	xxxx	39	1	1	0	0
692	1	660	30.3	1	0	1	1	1	1	0	1	0	0	1	1	0	1	0	xxxx	5	7	-1	-1	-1	30+2	1	0	8.02	0.23	0	0	0	0	0	0	0	2	0	xxxx	0	0	xxxx	1	grave iposviluppo, pat,genetica?	115	0	1	0	1
693	0	1730	32	0	1	0	0	0	0	0	1	0	1	0	0	0	0	0	xxxx	7	9	-1	7.44	7.39	30+6	0	192	12.97	3.88	5	1	2	0	0	0	0	2	1	S1 G2	1	1	S2 G1	0	xxxx	25	1	1	0	0
694	1	1210	31.4	0	0	1	1	1	0	0	0	0	0	0	0	0	0	0	xxxx	8	9	9	-1	-1	31+3	1	0	5.94	-1	0	0	0	0	0	0	0	2	0	xxxx	0	0	xxxx	0	xxxx	55	1	1	0	0
695	1	680	23.6	0	0	1	0	0	0	0	1	0	0	1	1	0	3	0	xxxx	3	6	7	-1	-1	23+2	0	48	13.48	3.99	0	0	4 + 5	0	0	1	0	0	1	S2 G1	1	1	S1 G2	1	prematurità estrema, PNX	2	0	1	0	0
696	1	1980	33.4	0	0	1	1	1	1	0	0	0	0	0	0	0	0	0	xxxx	9	10	10	7.34	7.32	33+3	1	0	7.49	-1	5	0	0	0	0	0	0	2	0	xxxx	0	0	xxxx	0	xxxx	14	1	1	0	0
697	0	1150	33.4	1	0	1	1	1	1	0	0	0	0	0	0	0	0	0	xxxx	9	10	10	-1	-1	33+3	1	0	7.49	-1	5	0	0	0	0	0	0	2	0	xxxx	0	0	xxxx	0	xxxx	30	1	1	0	0
698	0	2150	33.8	0	0	1	1	1	1	0	1	0	0	1	0	0	1	0	xxxx	7	9	-1	-1	-1	33+6	1	0	9.08	-1	0	0	0	0	1	0	0	2	0	xxxx	0	0	xxxx	0	xxxx	17	1	1	0	0
699	1	2245	33.8	0	0	1	1	1	1	3	1	0	0	0	1	0	1	0	xxxx	3	7	9	7.1	7.04	33+6	1	0	9.08	-1	0	0	0	0	1	0	0	2	0	xxxx	0	0	xxxx	0	xxxx	17	1	1	0	0
700	0	1765	34.6	0	0	0	1	1	0	0	0	0	0	0	0	0	0	0	xxxx	9	9	-1	-1	-1	34+5	1	0	7.52	-1	1	0	0	0	1	0	0	2	0	xxxx	0	0	xxxx	0	xxxx	19	1	1	0	0
701	0	2470	34	0	1	0	1	1	0	3	1	0	0	0	1	0	0	0	xxxx	6	8	-1	7.38	7.3	34+0	0	20	15.34	0.17	1	0	0	0	0	0	0	2	0	xxxx	0	0	xxxx	0	xxxx	7	1	1	0	0
702	1	1940	33.7	0	5	0	1	2	0	0	1	0	0	1	1	0	1	0	xxxx	1	5	6	6.89	6.82	33+5	1	0	-1	-1	0	0	0	0	0	0	0	0	0	xxxx	0	0	xxxx	0	xxxx	27	1	1	0	0
703	0	1925	34.3	0	0	0	1	2	0	0	0	0	0	0	0	0	0	0	xxxx	7	9	-1	-1	-1	34+2	1	0	7.09	0.51	0	0	0	0	0	0	0	2	0	xxxx	0	0	xxxx	0	xxxx	14	1	1	0	0
704	1	1965	34.7	0	0	0	1	1	0	0	0	0	0	0	0	0	0	0	xxxx	9	10	10	-1	-1	34+5	1	0	9.32	0.05	0	0	0	0	0	0	2	2	0	xxxx	0	0	xxxx	0	xxxx	11	1	1	0	0
705	0	1475	34.2	1	0	0	1	1	0	0	0	0	0	0	0	0	0	0	xxxx	9	10	10	-1	-1	34+1	1	0	7.88	-1	0	0	0	0	0	0	0	0	0	xxxx	0	0	xxxx	0	xxxx	20	1	1	0	0
706	0	1790	33	0	0	1	1	1	1	0	0	0	0	0	0	0	0	0	xxxx	9	10	10	-1	-1	33+0	1	0	12.68	-1	1	1	0	0	0	0	0	2	0	xxxx	0	0	xxxx	0	xxxx	19	1	1	0	0
707	0	1655	33	0	0	1	1	1	1	0	0	0	0	0	0	0	0	0	xxxx	9	10	10	-1	-1	33+0	1	0	12.68	-1	1	1	0	0	0	0	0	2	0	xxxx	0	0	xxxx	0	xxxx	19	1	1	0	0
708	0	1930	32.4	0	1	0	1	1	1	0	1	0	0	1	0	0	0	0	xxxx	5	8	-1	-1	-1	32+3	1	0	12.63	1.09	0	0	0	0	0	0	0	0	0	xxxx	0	0	xxxx	0	xxxx	31	1	1	0	0
709	0	1970	32.4	0	1	0	1	1	1	0	0	0	0	0	0	0	0	0	xxxx	8	9	-1	-1	-1	32+3	1	0	12.63	1.09	0	0	0	0	0	0	0	0	0	xxxx	0	0	xxxx	0	xxxx	31	1	1	0	0
710	1	1685	32	0	0	0	1	1	1	0	1	0	1	1	0	0	1	0	xxxx	7	8	-1	-1	-1	32+0	1	0	10.11	0.26	0	0	0	0	0	0	0	0	0	xxxx	0	0	xxxx	0	xxxx	50	1	1	0	0
711	1	1900	32	0	0	0	1	1	1	0	1	0	1	0	0	0	1	0	xxxx	8	9	-1	-1	-1	32+0	1	0	10.11	0.26	0	0	0	0	0	0	0	0	0	xxxx	0	0	xxxx	0	xxxx	50	1	1	0	0
712	1	1200	30	0	5	0	1	1	0	0	1	0	0	1	0	0	1	0	xxxx	6	9	-1	7.35	7.31	28+5	0	192	10.81	2.34	4	1	4 + 5	0	0	0	0	2	1	S2 G2	1	1	S1 G1	0	xxxx	37	1	4	1	0
713	0	2035	34.7	0	0	0	1	1	1	0	0	0	0	0	0	0	0	0	xxxx	9	10	10	-1	-1	34+5	1	0	8.21	-1	0	0	0	0	0	0	0	0	0	xxxx	0	0	xxxx	0	xxxx	12	1	1	0	0
714	0	1590	34.7	0	0	0	1	1	1	0	0	0	0	0	0	0	0	0	xxxx	9	10	10	-1	-1	34+5	1	0	8.21	-1	0	0	0	0	0	0	0	0	0	xxxx	0	0	xxxx	0	xxxx	20	1	1	0	0
715	0	1010	30	0	5	0	1	1	0	0	1	0	0	1	1	0	1	0	xxxx	5	8	-1	-1	-1	28+5	0	48	9.25	0.18	2 + 15 + 8	1	4 + 5	0	0	0	0	2	1	S2 G2	0	1	S2 G2	0	xxxx	74	1	1	1	0
716	0	1970	31.4	0	5	1	0	0	0	0	1	1	0	1	0	0	1	0	xxxx	7	7	8	-1	-1	31+3	0	18	13.13	6.33	2 + 15	0	4 + 5 + 10	0	0	0	2	2	1	S2 G2	1	1	S1 G1	0	xxxx	23	1	15	0	0
717	1	1945	34	0	0	0	1	2	0	0	1	0	0	1	0	0	0	0	xxxx	6	9	-1	7.36	7.32	34+0	1	0	9.83	-1	0	0	0	0	0	0	0	0	0	xxxx	0	0	xxxx	0	xxxx	25	1	1	0	0
718	1	2630	34	0	0	0	1	1	0	0	1	0	0	1	0	0	0	0	xxxx	6	8	-1	7.36	-1	34+0	0	10	-1	-1	1	0	4 + 5	0	0	0	2	2	0	xxxx	0	0	xxxx	0	xxxx	13	1	1	0	0
719	1	2390	34	0	0	0	1	1	0	0	0	0	0	0	0	0	0	0	xxxx	8	9	-1	-1	-1	34+0	1	0	8.41	-1	0	0	0	0	0	0	0	0	0	xxxx	0	0	xxxx	0	xxxx	7	1	1	0	0
720	1	1340	30.3	0	0	0	1	1	0	0	1	0	0	1	0	0	1	0	xxxx	4	9	9	7.28	7.18	30+2	1	0	8.46	0.75	0	0	0	0	0	0	0	2	1	S1 G1	0	0	xxxx	0	xxxx	31	1	1	0	0
721	1	1755	31.8	0	0	0	1	1	1	0	1	0	1	0	0	0	0	0	xxxx	7	9	9	-1	-1	31+6	1	0	11.8	0.11	1	0	0	0	0	0	0	2	0	xxxx	0	0	xxxx	0	xxxx	24	1	1	0	0
722	1	1915	31.8	0	0	0	1	1	1	0	1	0	1	1	0	0	1	0	xxxx	7	9	9	-1	-1	31+6	1	0	11.8	0.11	1	0	0	0	0	0	0	2	0	xxxx	0	0	xxxx	0	xxxx	24	1	1	0	0
723	1	2050	34	0	0	0	1	1	0	0	0	0	0	0	0	0	0	0	xxxx	9	10	10	-1	-1	34+0	1	0	11.16	-1	0	1	0	0	0	0	0	0	0	xxxx	0	0	xxxx	0	xxxx	13	1	1	0	0
724	1	1490	34	1	0	0	1	1	0	0	0	0	0	0	0	0	0	0	xxxx	9	10	10	-1	-1	34+0	1	0	6.76	-1	0	0	0	0	1	0	0	2	0	xxxx	0	0	xxxx	0	xxxx	20	1	1	0	0
725	1	2885	34	0	0	0	0	0	0	0	0	0	0	0	0	0	0	0	xxxx	9	10	10	-1	-1	34+0	0	9	-1	-1	0	0	5	0	0	0	0	0	1	S2 G2	0	1	S1 G1	0	xxxx	8	1	1	0	0
726	0	1710	33.4	0	1	0	1	1	0	0	0	0	0	0	0	0	0	0	xxxx	8	9	-1	7.35	7.3	33+3	1	0	10.7	1.23	0	0	0	0	0	0	0	2	1	S3 G2	1	1	S2 G2	0	xxxx	13	1	1	0	0
727	0	2140	34.6	0	0	0	1	1	1	0	1	0	1	0	0	0	1	0	xxxx	7	8	-1	7.36	7.32	34+4	1	0	6.23	0.18	0	0	0	0	0	0	0	0	0	xxxx	0	0	xxxx	0	xxxx	14	1	1	0	0
728	0	1735	34.6	0	0	0	1	1	1	0	0	0	0	0	0	0	0	0	xxxx	8	9	-1	7.35	7.32	34+4	1	0	6.23	0.18	0	0	0	0	0	0	0	0	0	xxxx	0	0	xxxx	0	xxxx	14	1	1	0	0
729	1	800	25.7	0	0	0	1	1	1	0	1	0	0	1	0	0	2	0	xxxx	5	8	-1	7.29	-1	25+5	1	0	15.31	-1	5	1	0	0	0	0	0	2	1	S2 G2	0	1	S1 G1	0	xxxx	186	1	1	0	1
730	1	800	25.7	0	0	0	1	1	1	0	1	0	0	1	0	0	1	0	xxxx	5	6	-1	7.35	-1	25+5	1	0	15.31	-1	5	1	0	0	0	0	0	2	1	S2 G2	0	0	xxxx	0	xxxx	186	1	1	0	0
731	1	775	25.7	0	0	0	1	1	1	0	1	0	0	1	0	0	2	0	xxxx	5	8	-1	7.34	7.3	25+5	1	0	15.31	-1	5	1	0	0	0	0	0	2	1	S2 G1	0	1	S1 G1	0	xxxx	186	1	1	0	0
732	0	1990	33.7	0	0	0	1	1	1	0	0	0	0	0	0	0	0	0	xxxx	8	8	-1	-1	-1	33+5	1	0	8.78	-1	15	0	0	0	0	0	0	2	0	xxxx	0	0	xxxx	0	xxxx	14	1	1	0	0
733	0	1715	33.7	0	0	0	1	1	1	0	0	0	0	0	0	0	0	0	xxxx	8	8	-1	-1	-1	33+5	1	0	8.78	-1	15	0	0	0	0	0	0	2	0	xxxx	0	0	xxxx	0	xxxx	15	1	1	0	0
734	0	2140	34.7	0	0	1	1	1	1	0	0	0	0	0	0	0	0	0	xxxx	8	9	-1	-1	-1	34+0	1	0	9.06	-1	2	0	0	0	0	0	0	0	0	xxxx	0	0	xxxx	0	xxxx	8	1	1	0	0
735	1	1980	34.7	0	0	1	1	1	1	0	0	0	0	0	0	0	0	0	xxxx	8	9	-1	-1	-1	34+0	1	0	9.06	-1	2	0	0	0	0	0	0	0	0	xxxx	0	0	xxxx	0	xxxx	8	1	1	0	0
736	0	850	25.7	0	0	0	1	1	0	3	1	0	0	1	1	0	0	0	xxxx	6	8	-1	7.39	7.34	25+5	0	5	15.59	3	2	0	4 + 10	0	0	0	2	2	1	S3 G3	1	1	np	0	xxxx	145	1	1	0	1
737	1	1745	33	0	0	1	1	1	1	0	0	0	0	0	0	0	0	0	xxxx	8	9	-1	-1	-1	27+0	0	1000	10.07	-1	1	0	4 + 5 + 14	0	1	0	0	2	0	xxxx	0	0	xxxx	0	xxxx	16	1	1	0	0
738	0	1075	33	0	0	1	1	1	1	0	0	0	0	0	0	0	0	0	xxxx	8	9	-1	-1	-1	27+0	0	1000	10.07	-1	1	0	4 + 5 + 14	0	1	0	0	2	0	xxxx	0	0	xxxx	0	xxxx	67	1	1	0	0
739	1	1470	28.8	0	0	0	1	1	0	0	1	0	1	1	0	0	1	0	xxxx	7	8	9	7.44	7.36	26+6	1	0	-1	-1	1	1	0	0	0	0	3	2	1	S2 G2	0	0	xxxx	0	xxxx	50	1	1	0	0
740	0	820	29.2	1	0	0	1	1	0	1	1	0	1	1	0	0	0	0	xxxx	7	9	-1	7.18	7.07	29+1	1	0	14.08	0.4	1	0	0	0	0	0	0	2	0	xxxx	0	0	xxxx	0	xxxx	71	1	1	1	0
741	1	880	27.4	0	0	1	1	1	1	0	1	0	1	1	0	0	1	0	xxxx	6	7	-1	7.42	-1	27+3	0	10	12.32	0.05	2	0	0	0	0	1	0	1	0	xxxx	0	0	xxxx	0	xxxx	99	1	1	0	0
742	0	680	24	0	3	0	1	1	0	0	1	0	0	1	1	0	2	0	xxxx	5	8	-1	-1	-1	24+0	1	0	8.6	-1	0	0	0	0	0	0	0	0	1	S2 G2	0	1	S1 G1	1	prematurità estrema	6	0	1	0	0
743	1	1600	30	0	0	0	0	1	0	0	1	0	1	1	0	0	1	0	xxxx	8	9	-1	7.33	7.3	30+0	0	1	18.72	0.9	0	0	5	0	0	0	0	2	0	xxxx	1	0	xxxx	0	xxxx	38	1	1	0	0
744	1	1415	30	0	0	0	1	1	0	0	0	0	0	0	0	0	0	0	xxxx	9	10	10	7.33	7.28	30+0	1	0	10.49	0.46	0	0	0	0	0	0	0	0	0	xxxx	0	0	xxxx	0	xxxx	53	1	1	0	0
745	0	1205	31	0	0	0	1	1	0	0	0	0	0	0	0	0	0	0	xxxx	9	10	10	7.35	7.33	31+0	1	0	-1	-1	0	0	0	0	0	0	0	0	0	xxxx	0	0	xxxx	0	xxxx	75	1	1	0	0
746	0	595	28.2	1	0	0	1	1	0	0	1	0	0	0	1	0	2	0	xxxx	3	9	-1	7.29	-1	28+4	1	0	16.15	0.92	0	0	0	0	0	0	0	0	0	xxxx	0	0	xxxx	0	xxxx	107	1	1	0	1
747	0	775	24	0	0	0	0	0	0	0	1	0	0	1	1	0	1	0	xxxx	5	7	-1	7.38	-1	24+0	0	2	20.29	3	2	0	5	0	0	0	0	0	1	S3 G2	1	1	S2 G2	0	xxxx	84	1	2	0	1
748	0	745	30	1	0	0	1	1	0	0	0	0	0	0	0	0	0	0	xxxx	9	10	10	-1	-1	30+0	1	0	17.73	0.47	0	0	0	0	0	0	0	2	0	xxxx	0	0	xxxx	0	xxxx	70	1	1	0	0
749	1	2460	32.2	0	0	1	1	1	1	0	1	0	1	0	0	0	0	0	xxxx	7	8	-1	7.37	-1	32+2	1	0	-1	-1	0	0	0	0	0	0	0	0	0	xxxx	0	0	xxxx	0	xxxx	15	1	1	0	0
750	0	2320	32.2	0	0	1	1	1	1	0	0	0	0	0	0	0	0	0	xxxx	8	9	-1	-1	-1	32+2	1	0	-1	-1	0	0	0	0	0	0	0	0	0	xxxx	0	0	xxxx	0	xxxx	15	1	1	0	0
751	0	1650	32.6	0	0	0	0	0	1	0	0	0	0	0	0	0	0	0	xxxx	10	10	10	-1	-1	32+4	0	1	8.44	0.79	0	0	0	0	0	0	0	0	0	xxxx	0	0	xxxx	0	xxxx	21	1	1	0	0
752	1	2116	32.6	0	0	0	1	1	1	0	0	0	0	0	0	0	0	0	xxxx	8	9	-1	-1	-1	32+4	0	1	8.44	0.79	0	0	0	0	0	0	0	0	0	xxxx	0	0	xxxx	0	xxxx	17	1	1	0	0
753	0	2085	34.3	0	0	0	1	1	0	0	0	0	0	0	0	0	0	0	xxxx	9	10	10	-1	-1	34+2	1	0	-1	-1	0	0	0	0	0	0	0	0	0	xxxx	0	0	xxxx	0	xxxx	7	1	1	0	0
754	0	1300	32	1	0	0	1	1	1	0	0	0	0	0	0	0	0	0	xxxx	8	9	-1	7.35	7.29	31+2	0	120	10.69	1.28	1	1	4 + 5	0	0	0	0	2	0	xxxx	0	0	xxxx	0	xxxx	32	1	1	0	0
755	0	1415	32	0	0	0	1	1	1	0	1	0	0	1	0	0	0	0	xxxx	6	10	10	7.37	7.29	31+2	0	120	10.69	1.28	1	1	4 + 5	0	0	0	0	2	0	xxxx	0	0	xxxx	0	xxxx	32	1	1	0	0
756	0	1680	34	1	0	0	0	0	0	0	0	0	0	0	0	0	0	0	xxxx	9	10	10	-1	-1	34+0	0	12	10.42	0.05	0	0	4 + 5	0	0	0	0	0	0	xxxx	0	0	xxxx	0	xxxx	19	1	1	0	0
757	0	895	29	0	0	0	1	1	0	0	1	0	1	1	0	0	1	0	xxxx	7	9	-1	7.27	7.2	29+0	1	0	7.4	-1	0	0	0	0	1	0	0	2	0	xxxx	0	0	xxxx	0	xxxx	70	1	1	0	1
758	1	1450	28	0	1	0	0	0	0	0	1	0	1	1	0	0	2	0	xxxx	5	8	-1	7.37	7.24	26+4	0	264	13.14	3.39	15	0	4 + 7 + 10	0	0	0	0	2	1	S3 G2	1	1	S2 G1	0	xxxx	99	1	15	0	1
759	1	1445	30.4	0	1	0	1	0	0	0	1	0	0	1	0	0	1	0	xxxx	5	8	-1	-1	-1	29+0	0	240	38.99	3.18	6	1	4 + 5	1	0	1	1	2	1	S2 G2	1	1	S2 G2	0	xxxx	35	1	1	0	0
760	0	1985	33.7	0	0	0	0	0	0	0	0	0	0	0	0	0	0	0	xxxx	9	10	10	-1	-1	33+0	0	120	10.34	0.05	0	0	4 + 5	0	0	0	0	2	0	xxxx	0	0	xxxx	0	xxxx	11	1	1	0	0
761	0	1490	31	0	5	0	0	1	0	0	1	0	1	0	0	0	0	0	xxxx	7	8	-1	7.29	7.19	31+0	0	10	10.65	0.12	0	0	0	0	0	0	0	2	0	xxxx	0	0	xxxx	0	xxxx	53	1	1	0	0
762	1	2530	34.4	0	0	0	1	1	0	0	1	0	0	1	1	0	2	0	soluzione fisiologica 10 ml(kg	2	5	6	7.36	7.41	34+3	1	0	-1	-1	0	0	0	0	0	0	0	0	0	xxxx	0	0	xxxx	1	asfissia grave	5	0	1	0	0
763	1	1335	30.6	0	0	0	1	1	0	0	1	0	1	0	0	0	1	0	xxxx	8	9	-1	-1	-1	30+4	1	0	16.72	8.91	15	0	4 + 5	1	0	0	0	2	0	xxxx	1	0	xxxx	0	xxxx	50	1	1	0	0
764	0	1035	31	1	0	0	1	1	0	0	0	0	0	0	0	0	0	0	xxxx	9	10	10	-1	-1	31+0	1	0	9.46	0.61	0	0	0	0	1	0	0	2	0	xxxx	0	0	xxxx	0	xxxx	47	1	1	0	0
765	1	885	27.8	0	0	0	1	1	0	0	1	0	0	1	0	0	0	0	xxxx	8	9	-1	-1	-1	27+6	1	0	13.43	0.05	0	0	0	0	1	0	0	2	0	xxxx	0	0	xxxx	0	xxxx	82	1	1	0	0
766	0	1755	34.6	0	5	0	1	1	1	0	0	0	0	0	0	0	0	0	xxxx	8	9	-1	-1	-1	34+4	1	0	8.93	-1	0	0	14	0	0	0	0	0	0	xxxx	0	0	xxxx	0	xxxx	14	1	1	0	0
767	1	1885	34.6	0	5	0	1	1	1	0	0	0	0	0	0	0	0	0	xxxx	7	8	-1	-1	-1	34+4	1	0	8.93	-1	0	0	14	0	0	0	0	0	0	xxxx	0	0	xxxx	0	xxxx	14	1	1	0	0
768	0	1860	34.1	0	0	0	1	1	0	0	1	0	1	0	0	0	0	0	xxxx	8	9	-1	-1	-1	34+1	0	4	10.36	0.05	0	0	0	0	0	0	0	2	0	xxxx	0	0	xxxx	0	xxxx	14	1	1	0	0
769	0	2035	32.8	0	0	1	0	0	1	0	1	0	1	0	0	0	0	0	xxxx	8	8	-1	-1	-1	32+6	0	3	-1	-1	1	1	5	0	0	0	0	2	0	xxxx	0	0	xxxx	0	xxxx	14	1	1	0	0
770	1	1840	32.8	0	0	1	0	0	1	0	1	0	1	0	0	0	0	0	xxxx	8	10	10	-1	-1	32+6	0	3	-1	-1	1	1	5	0	0	0	0	2	0	xxxx	0	0	xxxx	0	xxxx	14	1	1	0	0
771	1	1225	29	0	5	0	1	1	0	0	1	0	1	0	0	0	0	0	xxxx	-1	-1	-1	7.31	7.16	27+3	0	240	16.15	1.35	1	1	5 + 10	0	0	0	1	2	1	S1G2	1	1	S2G2	0	xxxx	45	1	1	0	0
772	1	1360	31.2	0	0	0	1	1	0	0	1	1	1	0	0	0	0	0	xxxx	8	9	-1	7.31	7.29	31+1	1	0	5.79	0.51	1	0	0	0	1	0	0	2	0	xxxx	0	0	xxxx	0	xxxx	54	1	1	0	0
773	1	2240	34.8	0	0	0	1	1	0	0	1	0	0	1	0	0	0	0	xxxx	6	9	-1	-1	-1	35+6	1	0	-1	0.05	1	0	0	0	0	0	0	0	0	xxxx	0	0	xxxx	0	xxxx	8	1	0	0	0
774	1	2180	34.3	0	0	0	0	0	0	0	0	0	0	0	0	0	0	0	xxxx	8	9	-1	-1	-1	34+1	0	42	15.18	3.2	1	1	-1	1	0	0	0	0	1	S2G1	1	1	S1G1	0	xxxx	5	1	0	0	0
775	1	1360	29	0	0	0	1	2	0	0	1	1	0	1	1	0	1	0	xxxx	4	8	-1	7.3	7.29	29+0	1	0	17.81	0.38	0	1	0	0	0	0	0	2	0	xxxx	0	0	xxxx	0	xxxx	47	1	1	0	0
776	1	1090	31.6	1	0	0	1	1	1	0	1	0	0	1	0	0	0	0	xxxx	7	9	-1	7.3	7.2	31+4	1	0	8.96	0.37	0	0	0	0	0	0	0	2	0	xxxx	0	0	xxxx	0	xxxx	45	1	1	0	0
777	1	1450	31.6	0	0	0	1	1	1	0	0	0	0	0	0	0	0	0	xxxx	9	10	10	-1	7.34	31+4	1	0	8.96	0.37	0	0	0	0	0	0	0	2	0	xxxx	0	0	xxxx	0	xxxx	39	1	1	0	0
778	1	2195	34.2	0	0	0	1	0	1	0	1	1	1	0	0	0	0	0	xxxx	7	8	-1	7.27	7.15	34+0	0	12	-1	-1	1	3	5	0	0	0	0	2	0	xxxx	0	0	xxxx	0	xxxx	13	1	1	0	0
779	1	2095	34.2	0	0	0	1	0	1	0	1	0	0	1	1	0	1	0	xxxx	3	7	-1	7.31	7.17	34+0	0	12	-1	-1	1	3	5	0	0	0	0	2	0	xxxx	0	0	xxxx	0	xxxx	13	1	1	0	0
780	0	1185	30	0	0	0	1	-1	0	0	1	0	0	1	1	0	1	0	soluzione fisiologica 10 ml(kg	1	6	-1	7.28	7.24	30+0	1	0	14.43	2.49	0	0	0	0	1	0	0	0	0	xxxx	0	0	xxxx	0	xxxx	43	1	1	0	0
781	0	1800	32.6	0	0	0	1	1	1	0	1	1	1	1	0	0	1	0	xxxx	8	9	-1	7.3	7.22	32+3	0	30	13.14	0.36	0	0	5	0	0	0	0	2	0	xxxx	0	0	xxxx	0	xxxx	23	1	1	0	0
782	0	1745	32.6	0	0	0	1	1	1	0	1	0	1	1	0	0	1	0	xxxx	8	9	-1	7.21	7.19	32+3	1	0	13.14	0.36	0	0	5	0	0	0	0	2	0	xxxx	0	0	xxxx	0	xxxx	23	1	1	0	0
783	0	2320	34.8	0	0	0	1	1	1	0	0	0	0	0	0	0	0	0	xxxx	9	10	10	-1	-1	34+6	0	14	9.13	0.99	1	1	0	0	0	0	0	2	0	xxxx	0	0	xxxx	0	xxxx	9	1	0	0	0
784	1	2125	34.8	0	0	0	1	1	1	0	0	0	0	0	0	0	0	0	xxxx	9	10	10	-1	-1	34+6	1	0	9.13	0.99	1	1	0	0	0	0	0	2	0	xxxx	0	0	xxxx	0	xxxx	9	1	1	0	0
785	1	2020	33.2	0	0	1	1	1	1	0	0	0	0	0	0	0	0	0	xxxx	9	10	10	7.39	7.33	33+1	1	0	11.4	0.17	1	1	0	0	0	0	0	2	0	xxxx	0	0	xxxx	0	xxxx	14	1	1	0	0
786	1	2305	33.2	0	0	1	1	1	1	0	0	0	0	0	0	0	0	0	xxxx	8	9	-1	7.36	7.35	33+1	1	0	11.4	0.17	1	1	0	0	0	0	0	2	0	xxxx	0	0	xxxx	0	xxxx	14	1	1	0	0
787	1	1760	33	0	0	1	1	1	1	0	0	0	0	0	0	0	0	0	xxxx	9	10	10	7.34	7.31	33+0	1	0	8.32	-1	0	0	0	0	0	0	0	2	0	xxxx	0	0	xxxx	0	xxxx	25	1	1	0	0
788	0	1810	33	0	0	1	1	1	1	0	1	0	1	1	0	0	2	0	xxxx	5	7	8	7.33	7.3	33+0	1	0	8.32	-1	0	0	0	0	0	0	0	2	0	xxxx	0	0	xxxx	0	xxxx	25	1	1	0	0
789	1	1490	33	1	0	1	1	1	1	0	0	0	0	0	0	0	0	0	xxxx	9	10	10	-1	-1	33+0	1	0	8.32	-1	0	0	0	0	0	0	0	2	0	xxxx	0	0	xxxx	0	xxxx	33	1	1	0	0
790	0	1870	32.3	0	0	0	0	0	0	0	1	0	0	1	1	0	3	0	xxxx	2	7	-1	7.43	7.37	29+2	0	504	11.63	2.2	0	0	4 + 5	0	0	0	0	2	1	S3G1	0	1	S1G1	0	xxxx	55	1	1	0	0
791	0	1180	30.2	0	4	0	1	1	0	0	1	0	0	1	1	0	2	0	xxxx	5	8	9	7.13	-1	30+1	1	0	7.54	0.3	0	0	0	0	1	0	0	2	0	xxxx	0	0	xxxx	0	xxxx	26	1	1	0	1
792	0	1920	34.3	0	0	0	1	1	0	0	1	0	1	1	0	0	2	0	xxxx	6	9	-1	7.34	7.32	34+2	0	2	7.61	-1	1	1	0	0	1	0	0	2	0	xxxx	0	0	xxxx	0	xxxx	65	1	1	0	0
793	1	2225	33.2	0	0	0	1	1	0	0	1	0	1	0	0	0	0	0	xxxx	8	9	-1	7.39	7.3	33+1	1	0	10.21	0.32	0	0	0	0	0	0	0	2	0	xxxx	0	0	xxxx	0	xxxx	40	1	1	0	0
794	1	1555	31.6	0	0	0	1	2	1	0	1	0	1	1	0	0	0	0	xxxx	8	9	-1	7.35	7.31	31+4	0	2	-1	-1	1	1	0	0	0	0	0	2	0	xxxx	-1	0	xxxx	0	xxxx	28	1	1	0	0
795	1	1545	31.6	0	0	0	1	2	1	0	1	0	1	1	0	0	1	0	xxxx	3	7	-1	7.35	7.3	31+4	0	2	-1	-1	1	1	0	0	0	0	0	2	0	xxxx	-1	0	xxxx	0	xxxx	28	1	1	0	0
796	0	1350	29.2	0	0	0	1	1	0	0	1	0	1	1	0	0	1	0	xxxx	7	8	-1	-1	-1	23+5	0	912	12.41	4	1	1	1 + 4 + 5 + 10	1	0	0	0	2	1	cronica	1	0	xxxx	0	xxxx	89	1	1	0	0
797	1	1250	29	0	0	-1	1	1	1	0	1	0	1	1	0	0	0	0	xxxx	-1	-1	-1	-1	-1	28+5	0	48	10.89	0.13	1	0	5	0	0	0	0	2	0	xxxx	0	0	xxxx	0	xxxx	92	1	1	0	0
798	0	1150	29	0	0	-1	1	1	1	0	1	0	1	1	0	0	1	0	xxxx	7	8	-1	7.48	7.41	28+5	0	48	10.89	0.13	1	0	5	0	0	0	0	2	0	xxxx	0	0	xxxx	0	xxxx	87	1	1	0	0
799	1	2480	34	0	0	0	1	2	0	0	1	0	1	1	0	0	1	0	xxxx	5	8	10	7.34	7.3	34+0	1	0	5.78	-1	0	0	0	0	0	0	0	2	0	xxxx	0	0	xxxx	0	xxxx	10	1	1	0	0
800	1	2040	32.6	0	0	0	0	1	0	0	0	0	0	0	0	0	0	0	xxxx	8	9	-1	-1	-1	32+4	0	4	12.42	0.19	0	0	0	0	0	0	0	2	0	xxxx	0	0	xxxx	0	xxxx	13	1	1	0	0
801	0	875	26	0	1	0	1	1	0	0	1	0	1	1	0	0	1	0	xxxx	5	8	-1	7.38	7.34	23+2	0	480	12.44	5.5	6	1	10 + 17	0	0	0	0	2	1	S3G2	1	1	S3G2	1	sepsi	18	0	7	0	1
802	1	1400	34	1	0	0	1	1	0	0	1	0	1	1	0	0	0	0	xxxx	5	9	-1	7.36	-1	34+0	1	0	-1	-1	1	1	0	0	0	0	0	2	0	xxxx	0	0	xxxx	0	xxxx	37	1	1	0	0
803	1	640	23.7	0	0	0	0	1	0	0	1	0	0	1	1	0	3	0	xxxx	4	8	8	7.38	7.31	23+5	0	4	13.84	7	2	0	2 + 10	0	0	0	0	1	1	S3G2	1	1	S2G2	0	xxxx	174	1	2	0	1
804	1	2035	33	0	0	0	0	0	0	0	0	0	0	0	0	0	0	0	xxxx	8	9	-1	-1	-1	33+0	0	2	12.44	0.87	0	0	5	0	0	0	0	0	0	xxxx	0	0	xxxx	0	xxxx	12	1	15	0	0
805	1	2905	34.2	0	0	0	0	0	0	0	0	0	0	0	0	0	0	0	xxxx	9	10	10	-1	-1	33+6	0	50	12.17	0.87	3	0	4 + 5	0	0	0	0	0	0	xxxx	0	0	xxxx	0	xxxx	11	1	1	0	0
806	1	1320	30.2	0	0	0	1	1	1	0	1	0	1	0	0	0	0	0	xxxx	8	8	-1	7.37	7.33	30+1	0	10	13.83	0.5	1	1	0	0	0	0	0	0	0	xxxx	0	0	xxxx	0	xxxx	42	1	1	0	0
807	1	1300	30.2	0	0	0	1	1	1	0	1	1	1	0	0	0	0	0	xxxx	8	9	-1	7.39	7.38	30+1	0	10	13.83	0.5	1	1	0	0	0	0	0	0	0	xxxx	0	0	xxxx	0	xxxx	42	1	1	0	0
[truncated: 26 more columns]

## Sheet: LEGENDA
N° SCHEDA	SEX	BW	EG	AGA/SGA Fenton '03	ETNIA	TIPO DI GRAV.	TIPO di PARTO	MOTIVAZIONE	ANESTESIA	GEMELLARITA'	LIQUIDO TINTO	RIANIM.SP	CICLI SLI	NCPAP	VENTIL. IN MASCHERA	TET IN SP.	SURF. IN SP	O2 MAX IN SP	MASSAGGIO CARDIACO	FARMACI	APGAR 1	APGAR 5	APGAR 10	PH VEN	PH ART	SETT. ROM	TIPO ROTTURA	ORE LATENZA	GB AL PARTO	PCR AL PARTO (mg/dL)	TV	URINOCOLTURA	ANTIBIOTICO	FEBBRE AL PARTO	PRE-ECLAMPSIA (definitaSibai 2003)	ESPLORAZIONI DIGITALI	AMNIOS	STEROIDI	CA ISTOLOGICA SI/NO	CORIOAMNIONITE TIPO	CA CLINICA	FIRS/FUNISITE SI/NO	FIRS/FUNISITE TIPO	DECESSO NEONATALE	CAUSA MORTE NEONATALE	DURATA DEGENZA	TAMPONI INGRESSO	SEPSI EOS	SEPSI LOS
	0 =F 1=M		+1;0 ,2	0 = AGA	0=caucasica	0=spontanea	0=spontaneo		0=nessuna	0=no	0=limpido	0=no	n° cicli	0=mai	0=mai	0=no	0=no	0=21%	0=no								0=PROM Spontanea				0=NON ESEGUITO	0=NON ESEGUITO	0=NON ESEGUITO	0=no	0=no		0=normo	0=no	0=no	S= stadio 1,2,3, G=grado 1,2	0=no	0=no	S= stadio 1,2,3, G=grado 1,2	0=no			0=NON ESEGUITO	0=no	0=no
			+2: 0,3	1 = SGA	1=sudamericana	1=riproduzione assistita	1=TC		1=epidurale	1=sì	1=1+	1=sì		1=sì	1=sì	1=sì	1=sì	1=21-50%	1=sì								1=Indotta al parto				1=NEG	1=NEG	1=AMOXICILLINA+AC.CLAVULANICO	1= < 38	1=sì		1=anidramnios	1=incompleta	1=sì		1=sì	1=sì		1=sì			1=NEG	1=sì	1=sì
			+3: 0,4		2=nera		2=ventosa		2=generale		2=2+							2=51-90%									2=post amniocentesi				2=POS PER STREPT GR B	2=POS PER STREPT GR B	2=AMOXICILLINA	2= > 38 o < 38 in tp antibiotica/antipir.			2=oligoidramnios	2=completa									2=POS PER STREPT GR B
			+4: 0,6		3=asiatica						3=3+							3=>90%													3=POS PER ENTEROCOCCHI	3=POS PER ENTEROCOCCHI	3=ERITROMICINA				3=polidramnios										3=POS PER ENTEROCOCCHI
			+5: 0,7		4=india																										4=POS PER STAFILOCOCCUS AUREUS	4=POS PER STAFILOCOCCUS AUREUS	4=CLARITROMICINA														4=POS PER STAFILOCOCCUS AUREUS
			+6: 0,8		5=araba																										5=POS PER U.UREALYTICUM	5=POS PER U.UREALYTICUM	5=AMPICILLINA														5=POS PER U.UREALYTICUM
																															6= POS PER H.PARAINFLUENZAE	6= POS PER H.PARAINFLUENZAE	6=CLINDAMICINA														6= POS PER H.PARAINFLUENZAE
																															7=POS PER E.COLI	7=POS PER E.COLI	7=ACETOSSIETILCEFUROXIMA														7=POS PER E.COLI
																															8=POS PER K. PNEUMONIAE	8=POS PER K. PNEUMONIAE	8=CEFAZOLINA SODICA														8=POS PER K. PNEUMONIAE
																															9=POS PER MICOPLASMI	9=POS PER MICOPLASMI	9=CEFTRIAXONE														9=POS PER MICOPLASMI
																															10=POS PER PROTEUS	10=POS PER PROTEUS	10=METRONIDAZOLO														10=POS PER PROTEUS
																															11=POS PER PSEUDOMONAS AERUGINOSA	11=POS PER PSEUDOMONAS AERUGINOSA	11=AMPICILLINA/SULBACTAM														11=POS PER PSEUDOMONAS AERUGINOSA
																															12=POS PER CHLAMYDIA TRACHOMATIS	12=POS PER CHLAMYDIA TRACHOMATIS	12=TRIMETOPRIM-SULFAMETOSSAZOLO														12=POS PER CHLAMYDIA TRACHOMATIS
																															13=POS PER TRICHOMONAS	13=POS PER TRICHOMONAS	13=JOSAMICINA														13=POS PER TRICHOMONAS
																															14=POS PER GARDNERELLA V.	14=POS PER GARDNERELLA V.	14=CIPROFLOXACINA														14=POS PER GARDNERELLA V.
																															15=POS PER CANDIDA	15=POS PER CANDIDA	15 = cloramfenicolo ovuli														15=POS PER CANDIDA
																															18= serratia Marcescens	16=POS PER ST. EPIDERMIDIS (contaminato)	16 vancomicina														16=POS PER ST. EPIDERMIDIS (contaminato)
																																17 = MORGANELLA MORGANII	17= ceftazidime
																																	18 = gentamicina
																															fabio.gurgone@gmail.com
[truncated: 20 more columns]
